# Supplementary material
Source: PubMed Central journal article supplement (PMC9675396)
Supplement: NIHMS1849008-supplement-Supplementary_Material.pdf [file NIHMS1849008-supplement-Supplementary_Material.pdf]

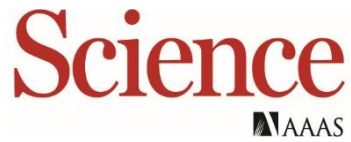

## Supplementary Materials for

### **Ancestry-inclusive dog genomics challenges popular breed stereotypes**

Kathleen Morrill *et al.*

Corresponding authors: Kathleen Morrill, [kathleen.morrill@umassmed.edu](mailto:kathleen.morrill@umassmed.edu); Elinor K. Karlsson, [elinor.karlsson@umassmed.edu](mailto:elinor.karlsson@umassmed.edu)

*Science* **376**, eabk0639 (2022)  
DOI: [10.1126/science.abk0639](https://doi.org/10.1126/science.abk0639)

#### **The PDF file includes:**

Materials and Methods  
Supplementary Text  
Figs. S1 to S34  
Tables S1 to S15  
References

#### **Other Supplementary Material for this manuscript includes the following:**

MDAR Reproducibility Checklist  
Data S1 to S20

## Table of contents

|                                                                                   |           |
|-----------------------------------------------------------------------------------|-----------|
| <b>Materials and Methods</b>                                                      | <b>3</b>  |
| <i>Enrollment</i>                                                                 | 3         |
| <i>Survey collection</i>                                                          | 3         |
| <i>Phenotypes derived from survey data</i>                                        | 4         |
| <i>Birth dates and age</i>                                                        | 4         |
| <i>Sex and sterilization status</i>                                               | 5         |
| <i>Validation of size phenotypes</i>                                              | 5         |
| <i>Validation of behavioral questions</i>                                         | 5         |
| <i>Exploratory factor analysis</i>                                                | 6         |
| <i>Sample collection</i>                                                          | 7         |
| <i>Reference genome assembly</i>                                                  | 7         |
| <i>Whole genome sequencing and joint variant calling</i>                          | 7         |
| <i>Unique and shared genetic variants</i>                                         | 8         |
| <i>Cumulative variant discovery</i>                                               | 8         |
| <i>Linkage disequilibrium</i>                                                     | 8         |
| <i>Runs of homozygosity in mutts, breeds, and village dogs</i>                    | 9         |
| <i>Low-pass sequencing with imputation</i>                                        | 9         |
| <i>Genotyping arrays</i>                                                          | 9         |
| <i>Imputation performance and genotype concordance</i>                            | 10        |
| <i>Merging and filtering</i>                                                      | 10        |
| <i>Homozygosity and inbreeding</i>                                                | 10        |
| <i>Kinship and relatedness</i>                                                    | 11        |
| <i>Breed name standardization</i>                                                 | 11        |
| <i>Breed standards, stereotypes, and popularity</i>                               | 11        |
| <i>Breed reference panel</i>                                                      | 11        |
| <i>Admixture simulations</i>                                                      | 12        |
| <i>Global ancestry inference</i>                                                  | 12        |
| <i>Breed set assignments</i>                                                      | 13        |
| <i>SNP-based heritability estimates</i>                                           | 13        |
| <i>Analysis of variance</i>                                                       | 14        |
| <i>Predictive value of breed, age, and size</i>                                   | 14        |
| <i>Interactive dashboard</i>                                                      | 14        |
| <i>Population Peculiarity Scoring (PPS)</i>                                       | 15        |
| <i>MuttMix survey</i>                                                             | 16        |
| <i>Linear mixed-effects regression models (LMERs)</i>                             | 17        |
| <i>Map of genes and open chromatin regions</i>                                    | 18        |
| <i>Genome wide association studies (GWAS) using mixed linear models</i>           | 19        |
| <i>Size prediction model</i>                                                      | 20        |
| <i>Gene sets enrichment analysis</i>                                              | 21        |
| <i>Genetic differentiation of breeds</i>                                          | 22        |
| <b>Supplementary Text</b>                                                         | <b>22</b> |
| <i>Marketing of DNA tests for breed ancestry</i>                                  | 22        |
| <i>Overview of sample sizes and inclusion/exclusion criteria for all analyses</i> | 23        |
| <b>Figures S1 to S34</b>                                                          | <b>26</b> |
| <b>Tables S1 to S15</b>                                                           | <b>72</b> |
| <b>Captions for databases S1 to S20</b>                                           | <b>95</b> |

## Materials and Methods

### Enrollment

Upon enrollment in Darwin's Ark (<https://darwinsark.org>), owners were asked to provide consent for participation and information about their dog's approximate birth date, sex and spay/neuter status, suspected or known breed(s), purebred registration, and/or photograph. We assigned dogs to nine major regions of the contiguous United States based on participant zip code, and defined as urban, suburban, and rural by the U.S. Census Bureau Decennial Census of 2010 ([www.census.gov](http://www.census.gov)) based on population density. We limited our analyses to data obtained until November 15th, 2019 ("data freeze" date). Dogs were prioritized for DNA sequencing by completeness of surveys, enrollment date, and distribution of survey responses.

### Survey collection

This manuscript includes data from the initial 11 behavioral surveys added to the Darwin's Ark project (ten questions each) (see **Data and materials availability**), and one survey about physical characteristics (eight questions), for a total of 118 questions (table S1) (the Darwin's Ark site currently includes 22 surveys with 8-10 questions each). The surveys were offered to owners in a static order, two at a time, on the owner's main account page (dubbed "My Laboratory"), although participants could also opt to answer them in any order by selecting "View All". Participants can opt to retake surveys, and both the original and retake responses are stored. For all analyses described here, only the original answer is used.

When survey questions are offered to owners, the text of the question is automatically updated for their dog. The variable text is capitalized when questions are described in our data files. For example, the size question, "When DOG is standing next to someone of average height, how high are HIS shoulders?" would be modified to replace DOG with the dog's name, and HIS with the appropriately gendered pronouns based on the owner's report of the dog's sex. We include the dog's name in every survey question, and pronouns as needed. This personalization ensures that owners of multiple enrolled dogs answer the question for the correct dog.

All 110 behavioral questions used a 5-point Likert scale: (1) 81 questions had options of strongly agree, agree, neither agree nor disagree, disagree, or strongly disagree; (2) 29 had options of never, rarely, sometimes, often, or always. Responses saved were codified as values {0,1,2,3,4}.

We sourced 79 behavioral questions from published and validated canine behavioral and health surveys: (a) Dog Personality Questionnaire (DPQ / DPQL; 45 questions) (37); (b) Canine Health-related Quality of Life Survey (CHQLS; 11 questions) (36); (c) Dog Impulsivity Assessment Scale (DIAS; 18 questions, including one also in DPQ) (34); (d) Canine Cognitive Dysfunction Rating scale (CCDR; 6 questions) (35).

We also included 31 new behavior questions and eight about breed-defining aesthetic traits (table S1). We developed the new behavior questions with input from animal behavior professionals associated with the International Association of Animal

Behavior Consultants. Our goal was to identify behaviors that were both heritable and easy for owners to identify, and thus well suited for a community science behavioral genetics project. We first collated a list of 46 possible question topics based on the professionals' initial suggestions, and then asked them score each topic on eight criteria, along a 5 pt scale: (1) incidence in pet dog population (rare to common); (2) how easily behavior is observed by owners (hard to easy); (3) whether the behavior was quantitative or binary; (4) whether environment was likely to have a major affect (likely to unlikely); (5) how malleable the behavior is (prone to resistant); (6) whether the owner was likely assign a value judgment to the behavior, and thus to try and train or untrain it (Biased to Neutral 1-5); (7) whether the prevalence of behavior tended to differ between breeds, suggesting heritability (low to high); (8) whether spay/neuter status would have a strong effect (strong to weak). From this, we identified 31 questions that scored at least moderately highly on all criteria, and were not included in existing surveys. Our subsequent heritability analysis showed a disproportionately high number of the new questions in the top quantile of heritability (12 out of 31, or 39%;  $p=0.04$  on 1-sample proportions test without continuity correction).

We also included a survey with eight questions about physical characteristics, and these had more variable options, including one allowed for more than one answer to be selected (Q#122, "What color is DOG? Select all that apply.", with eight options) (table S1). Ticking coat pattern phenotypes were validated in dogs with photos through manual examination. Another four asked owners to select an answer based on an accompanying graphic showing a range of responses (fig. S3). When physical trait questions were analyzed as quantitative traits in subsequent analyses, answers of "I'm not sure", "I don't know", "Not sure" and, for question #125, "Surgically cropped ears", were set to missing (NA).

#### Phenotypes derived from survey data

Phenotypes were primarily defined directly as behavioral factor scores, responses to behavioral questions, and responses to physical trait questions. For quantitative analyses, scores were normalized by calculating the standard score; normalized scores are included in the shared survey data files (see **Data and materials availability**).

#### Birth dates and age

All responses to survey questions were timestamped in POSIX time format. Prior to July 3rd, 2018, age and birth dates for enrollment were collected as free response entries. In order to standardize these as birth dates in international format (YYYY-MM-DD) for estimation of age, the following steps were executed using a combination of functions from the R packages ``data.table``, ``stringr``, ``anytime``, and ``lubridate``:

1. For dogs with a parsable birth date, directly convert to YYYY-MM-DD.
2. For dogs with a year and month, assign birth date YYYY-MM-01.
3. For dogs with a year only, assign birth date YYYY-01-01.
4. For dogs with no parsable birth date but age given in years and/or months, parse into duration and subtract from date of earliest survey to estimate birth date.
5. After each of the above steps:
  - a. Set all birth dates before January 1st, 1980 to NA

- b. Set all birth dates postdating survey response dates to NA
6. The remainder with age or birth date entries were parsed by hand, if an interpretable free response was given by the owner.
7. Otherwise, the birth date was rendered NA.

#### Sex and sterilization status

Half of dogs in our cohort (50.6%) were female, and 89.8% were spayed or neutered, higher than the ~70% reported in the most recent American Veterinary Medical Association demographic sourcebook (18). Sterilization rates for mutts in our data were 1.26x higher than purebred dogs, close to the 1.19x reported elsewhere (108). Sterilization status did not substantially change the effect of sex estimated for survey responses. The analysis of variance effect (ANOVA ges) of sex on behavioral survey responses remained constant across intact and sterilized dogs ( $R_{\text{pearson}}=0.997$ ,  $p=4.04 \times 10^{-142}$ ,  $N(\text{intact})=1,049$ ,  $N(\text{sterilized})=13,278$ ). In the final ANOVA analysis, we used four discrete sex categories: female (intact); female (sterilized); male (intact); male (sterilized).

#### Validation of size phenotypes

We validated the owner's responses to question #121, "When DOG is standing next to someone of average height, how high are HIS shoulders?" (see *Survey collection*) using both individual size measurements (done by both owner and non-owner), and using breed-average heights (data S1). **Validation set #1:** 337 dogs in which owners were provided with a measuring tape by mail and instructed to measure the height from their dog's shoulder to the ground (fig. S2B,C). **Validation set #2:** 38 dogs recruited during the 2017 Somerville Dog Festival in Somerville, MA. Owners were asked to complete the Darwin's Ark surveys, and responses were compared to the height to withers measurement done at the event by Darwin's Ark staff members (fig. S2D). **Validation set #3:** For 2,025 purebred dogs from breeds with average heights given in (109), we compared owner reported size to the average heights for their breed (fig. S2E). Pearson's correlation was calculated for each validation set using ``cor.test()`` in R package ``stats`` (version 4.1.1).

#### Validation of behavioral questions

We validated a subset of behavioral questions derived from published questionnaires performed as expected by comparing question-question correlations reported by the The Dog Personality Questionnaire (DPQ) (37) to our survey data. The original DPQ reported question-question correlations across 2,556 dogs (Study 3). The DPQ used a 7-point Likert scale keyed from "Strongly Disagree" to "Strongly Agree", though a subset of questions had responses reverse-keyed. The Darwin's Ark implementation of 48 DPQ items used a 5-point Likert scale keyed from "Strongly Agree" to "Strongly Disagree" (reverse direction, no re-keying of responses). We matched question numbers from the original DPQ (Appendix G) to question numbers from Darwin's Ark surveys and extracted the matrix of question-question correlations from the original DPQ (from Appendices E and F). We reversed original DPQ correlations ( $r = x-1$ ) for question pairs for which one question was indicated as re-keyed. For the same 48 questions sourced from the DPQ in Darwin's Ark across 10,253 dogs, we obtained the question-question

correlation matrix after normalization. We converted correlations to correlation distances ( $d = 1 - |r|$ ) and performed a Mantel's test between the original DPQ matrix and the Darwin's Ark DPQ matrix of correlation distances using *R* package `'ade4'` with 100,000 replicates and found a Mantel's *R* of 0.9466711 ( $p = 1 \times 10^{-7}$ ). We were not able to do a similar analysis of the other questionnaires used to source questions, as the published data did not include question-question correlations.

We also validated the subset of the questions from two other studies shown to correlate with age. For all questions, we also see an age correlation in Darwin's Ark. Two questionnaires included age-related questions: six questions sourced or paraphrased from questions in the Canine Cognitive Dysfunction Rating (CCDR) scale (110) (table S11) and 11 questions from the Canine Health-related Quality of Life Survey (CHQLS) (36) (table S12). In total, 14 questions were assessed (three questions overlap between the surveys). The PPS scores for all 14 questions are significantly correlated with age, with an average Pearson correlation of 0.889 (SD:0.121; range:0.630-0.99), compared to 0.661 (SD:0.308; range=0.0375-0.994) for the other 96 behavioral questions. The age correlations for these 14 questions are significantly higher than for other behavioral questions (one-sided t-test;  $t=5.06$ ;  $p=4.0 \times 10^{-6}$ ;  $df = 43.7$ ). The direction and magnitude of the change matched the previously published results.

#### Exploratory factor analysis

We performed exploratory factor analysis using the *R* package `'nFactors'` (111) on the behavioral survey questions using 10,253 dogs with answers for all 110 behavioral questions. All survey responses were first normalized to a 0-6 range using the *R* function `normalize (method="standardize")`. The number of factors to extract was estimated from several heuristic methods, namely Horn's Parallel Analysis ( $n = 20$ ), Optimal Coordinates ( $n = 20$ ), and Acceleration Factor ( $n = 2$ ), and the optimal factor number of 20 was selected. After excluding questions with low pattern or structure loadings ( $< \pm 0.3$ ), 19 factors were generated. A varimax orthogonal rotation was applied to generate a structure matrix with factor loadings for each question. The first 8 factors explained a cumulative 24.26% of variance (table S3), and were selected for additional analysis (fig. S4A,B). The remaining factors were discarded. An additional 6,269 dogs with less than 20% missing data had factor scores generated by filling missing data with randomly sampled values. The age of each dog for each factor was calculated as the mean age at survey response to questions included in that factor. Factor scores for 16,077 dogs enrolled before the data freeze date were retained.

We assigned names, adjectives to describe low and high scores, and short descriptions based on the questions captured by each factor. Factor 1 ("Human Sociability"), which captured questions about social interactions with people, explained 3.60% of variance. Factor 2 ("Arousal Level") included questions about a dog's reaction to excitement and explained another 4.06% of variance. Factor 3 ("Toy-directed Motor Patterns") included questions about engaging with toys and objects, which may represent underlying differences in canine motor patterns. Factor 4 ("Biddability") represented ease of training and amenability to trained behaviors. Factor 5 ("Agonistic Threshold") describes the conditions and contexts in which a dog may apply agonistic behavior.

Factor 6 (“Dog Sociability”) highlighted dog-directed social interactions. Factor 7 (“Environmental Engagement”) covers questions about a dog’s responsiveness to their surroundings. Factor 8 (“Proximity Seeking”) describes behaviors aimed at human contact and proximity. See table S4 for a breakdown of these factors.

#### Sample collection

We sent owners saliva collection kits (DNA Genotek PG-100 saliva swabs) to sample their dogs, and received and stored a total of 6,909 saliva samples. We preferentially selected dogs for sequencing based on survey completeness and enrollment date, as well as including dogs from several underrepresented breeds to expand the breed calling panel to include the 100 most common breeds in the U.S. Of 1,715 samples submitted for low-coverage DNA sequencing, 159 samples (7.4% of 2,155 dogs included in the genetic data set) had sequencing funded by owner donations to the Darwin’s Ark Foundation, a 501(c)(3) non-profit organization (82-3942341).

#### Reference genome assembly

For all genetic analyses, we use the CanFam3.1 reference genome assembly (NCBI accession GCF\_000000145.2). Chromosome Y was excluded because of the lack of a high quality assembly. For imputed data, chromosome X was excluded because of the potential for its smaller population size (~75% that of autosomes) to impact both imputation and selection analyses.

#### Whole genome sequencing and joint variant calling

We performed high-coverage whole genome sequencing (WGS) at an average 45.82x (SD: 9.76x) of 27 putatively mixed-breed dogs and completed the first genetic analysis of this population, dubbed the Mendel’s Mutts cohort (data S2). We performed joint variant calling on 676 whole genomes of dogs, wolves, and other canids, including 22 of the 27 mutts, from publicly available sequencing data as well as sequencing data we released under BioProject PRJNA683923. All steps of variant calling were performed using the Genome Analysis Toolkit (GATK3, nightly version from June 24th, 2016). First, GATK Base Quality Score Recalibration (BQSR) ran with standard arguments and specified, known canid variants comprising 19,112,082 distinct single-nucleotide polymorphic sites compiled from the Dog Genome SNP Database (DoGSD), Broad Institute (BICF), and Axiom. Second, gVCFs were generated using GATK HaplotypeCaller. Two genotype quality bands were set with upper bounds of 20 and 100 (-GQB 20 -GQB 100). Paths with fewer than 2 supporting kmers were pruned (-minPruning 2). Since we were unsure if any PCR free samples were included, we set the PCR indel model to none (-pcrModel NONE). GATK GenotypeGVCFs performed joint variant calling of all samples together to produce a single VCF. The SNPs and indels were filtered separately and subsequently recombined. The SNPs were filtered using the following parameters: "QD < 2.0 || FS > 60.0 || MQ < 40.0 || MQRankSum < -12.5 || ReadPosRankSum < -8.0". Indel filtering used the following parameters: "QD < 2.0 || FS > 200.0 || InbreedingCoeff < -0.8 || SOR > 10.0 || ReadPosRankSum < -20.0". After joint calling, we removed samples that did not meet a minimum coverage of 10x and 0.8 calling rate. We split multiallelic sites into biallelic records and normalized and left-

aligned insertions / deletions using the *BCFtools* norm function with the CanFam3.1 reference FASTA. We then performed haplotype phasing with *Beagle* (v5).

The final VCF, referred to as the Broad-UMass Canid Variants (available at <https://data.broadinstitute.org/DogData/>), contained 46,134,885 anchored variant records, with 34,191,821 SNPs and 11,943,064 insertions / deletions for 540 dogs of known breed ancestry distributed among ~133 breeds, 28 dogs of mixed breed ancestry (22 of which come from the deeply sequenced Mendel's Mutts cohort described below), 12 dogs of unknown ancestry, 62 worldwide indigenous or village dogs, 33 wolves, and 1 coyote. See data S4 for samples included in the variant call file. The other 5 mutts in the Mendel's Mutts cohort underwent calling for the same set of variants in the Broad-UMass VCF using HaplotypeCaller from GATK3 in genotyping mode 'GENOTYPE\_GIVEN\_ALLELES'.

#### Unique and shared genetic variants

We selected 22,139,829 biallelic SNPs from autosomes and chrX with allele count  $\geq 1$  across all 27 mutts and 530 breed whole genomes representing 128 breeds; of these, 375,474 (1.7%) were unique to mutts and not observed in any sampled breeds; 11,599,379 (52.4%) were shared between mutts and breeds; and 4,577,549 (20.7%) were unique to individual breeds, among which each breed had, on average,  $35,762 \pm 68,719$  unique SNPs. Another 5,587,427 (25.2%) SNPs were shared across 1+ breeds and unobserved in the mutts. To assess the frequencies of population-specific SNPs, we randomly sampled  $n=10$  dogs from mutts and each of 13 breeds.

#### Cumulative variant discovery

We compared the rate of variant discovery by whole genome sequencing of individual purebred versus mutt dogs, using a randomly chosen chromosome (chr13) as a proxy for the whole genome. From among the 557 total dogs for which 30x WGS data were available, we considered three cohorts: one random dog per breed ( $N=128$  possible dogs), mutts from Mendel's Mutts ( $N=27$  dogs), and, separately, dogs of each of the four breeds for which WGS data were available from  $>27$  individuals: golden retriever ( $N=36$ ), Yorkshire terrier ( $N=56$ ), Labrador retriever ( $N=31$ ), and Leonberger ( $N=38$ ). We computed the cumulative distribution of the fraction of the 619,031 chr13 variants discovered using all 557 dogs that were discovered using from one to ten dogs randomly chosen and ordered from within each cohort. We computed 95% CI from the distribution of values from random reorderings within each cohort.

#### Linkage disequilibrium

Analysis of linkage disequilibrium was done with *PLINK* v1.90b6.9. For each population in the Broad-UMass Canid Variants VCF, 25 dogs were chosen at random from all dogs in the population. We tested seven populations: (1) mixed breed dogs (Mendel's Mutts); (2) four breeds (golden retriever, Labrador retriever, Leonberger, and Yorkshire terrier); (3) village dogs; (4) wolves. We included mixed breed dogs and golden retrievers with WGS coverage  $> 30x$ ; for other populations, coverage was  $>15x$ . We first filtered for autosomal, bi-allelic variants, and then selected 20,000 random SNPs. For each population, we assessed the extent of LD by measuring  $r^2$  between each

random variant and all variants within 100kb. We assessed tagging of variant sets by measuring  $r^2$  between each random variant and variant sites included on genotyping arrays or in the low-pass sequencing GWAS dataset (171,882 for the Illumina HD, 1,011,992 for the Axiom, and 10,355,966 for low pass sequencing). Within each population, we analyzed all SNPs with MAF > 0.025 (table S13).

#### Runs of homozygosity in mutts, breeds, and village dogs

We compared the lengths of detected runs of homozygosity in mutts, dog breeds, and village dogs using whole genome sequencing data for dogs in the Broad-UMass Canid Variants set (58,308,734 biallelic SNPs) and Mendel's Mutts cohort (56,797,766 biallelic SNPs). The settings used to detect ROH in the WGS data were as follows: minimum run length of 100kb (--homozyg-kb 100) and minimum SNP count of 100 SNPs (--homozyg-snp 100), at a density of 1kb per SNP (--homozyg-density 1), with no two SNPs more than 500kb apart (--homozyg-gap 500), and no heterozygous genotypes tolerated (--homozyg-window-het 0) (112). The remaining options given by the default settings implemented in *PLINK* v1.90b6.21 (19 Oct 2020). We then randomly sampled  $n=464$  runs, the mean number of ROH detected in each mutt, from the pool of ROH detected in mutts, purebred dogs, and village dogs, resampling  $N=100$  times.

#### Low-pass sequencing with imputation

1,715 dogs enrolled in Darwin's Ark were sequenced at coverages of 0.5x to 1.1x depth on the Gencove sequencing platform. Sequencing reads were processed into imputed autosomal variant calls through Gencove's *loimpute* software (46) using the copying model described in Li and Stephens, 2003 (113), and an imputation reference panel containing publicly available whole genome sequence data (mean coverage 22.9x (SD: 14.2x)) for 435 canids and representing 287 dogs of known pure breed ancestry, 6 dogs of unknown ancestry, 100 worldwide indigenous or village dogs, 36 wolves, and 6 other wild canids, VCF provided by Elaine Ostrander of the National Human Genome Research Institute (all accessions in data S4). This generated 46,349,043 unfiltered call site records -- 32,438,672 SNPs and 13,910,371 indels -- mapping at a density 19.8 (SD: 6.9) variants of per kb. We used the impute genotype probability (GP) scores per genotype per call site per dog for filtering purposes. Filtered at GP >70%, each dog averaged 32,213,747 (SD: 141,060) SNPs and 13,603,537 (SD: 63,729) indels, including 98% of common variants (minor allele frequency > 1% in dogs with high-coverage WGS data). This data was merged and filtered according to the procedures listed below. See data S4 for samples in the imputation reference panel.

#### Genotyping arrays

440 dogs underwent genotyping on the Axiom Canine Genotyping Array Set A & B for 1,268,920 variant call sites (1,267,416 SNPs and 1,504 indels) before we adopted the low pass sequencing approach described above. Variant call data for these samples were subsequently imputed with *loimpute* against the same panel described above, also resulting in 46,349,043 unfiltered call sites with GP scores. Filtered at GP >70%, each dog averaged 32,006,290 (SD: 157,307) SNP and 13,497,132 (SD: 50,619) indels. This data was merged and filtered according to the procedures listed below.

### Imputation performance and genotype concordance

We used two approaches to compare the performance of low-pass sequencing plus imputation to that of genotyping arrays in admixed dogs: (1) by running low coverage ( $1.0\times \pm 0.6\times$ ) re-sequencing and genotyping arrays on mutts with WGS data and (2) by down-sampling WGS data. For the truth set of genotypes, we selected SNPs at MAF  $>2\%$  in 676 dogs and observed at least once in the 27 dogs from the Mendel's Mutts cohort. The sample genotype concordance between unimputed and imputed genotypes from genotyping arrays (9 dogs, 10 arrays) or imputed genotypes from low-pass sequencing (11 dogs, 14 sequencing runs) or downsampling (5 dogs) and whole genome sequencing data was evaluated using the *BCFtools* stats function.

Low-pass sequencing plus imputation provided a higher density of variant calls ( $19.8 \pm 6.9$  variants per kb,  $\sim 40\times$  denser than the Axiom array). We found concordance between low-pass and WGS of  $98.3 \pm 0.7\%$  ( $n=14$  runs;  $\sim 7.7$  million SNPs of MAF  $>2\%$  across 676 dogs), similar but slightly lower than the Axiom array ( $99.3\% \pm 0.1\%$ ;  $n=10$  arrays; 0.83 million SNPs), but better than imputed array calls ( $97.3 \pm 0.3\%$ ; 7.6 million SNPs), with a lower discordance for imputing heterozygous genotypes (1.09% vs. 1.66%).

### Merging and filtering

Prior to merging, samples processed by low-pass sequencing or genotyping arrays with imputation were filtered to remove genotypes with genotype probability below 70% (*BCFtools* `-e 'MAX(GP[*])<0.7'`). Subsequently, VCFs were merged (*BCFtools*) and converted to a *PLINK* data set. SNPs below a minor allele frequency of 2% and missing in over 20% of individuals were filtered out (*PLINK* `--maf 0.02 --geno 0.20`). Only biallelic SNPs with extreme deviation from Hardy-Weinberg equilibrium, given  $p$ -values below  $1\times 10^{-20}$  in the exact test with mid- $p$  adjustment and at observed/expected heterozygosity ratios under 0.25 or above 1.0, were excluded. After filtering data, 8,518,951 SNPs and 2,155 dogs remained with a total genotyping rate of 97.5%. Owner-reported sexes were encoded in the sample information file, confirmed by relative X-chromosome coverage for sequencing data (*SAMtools* `idxstats`) and the autosomal genotypes of X for genotyping data; in total, 1,084 males and 1,071 females. Six dogs flagged as unusual in their ratio of X chromosome coverage to autosomal coverage, and two of which came from dogs of the same household but could not be confirmed as sample mix ups. Variant IDs were assigned to include chromosome, position, reference allele, and alternate allele.

### Homozygosity and inbreeding

We scanned for runs of homozygosity in the genetic data for the Darwin's Ark cohort. For the Darwin's Ark cohort, we scanned 32,742,462 biallelic SNP genotypes with genotype probability  $>70\%$  using *PLINK* (v.1.9) with the following settings: minimum run length of 500kb (`--homozyg-kb 500`) and minimum SNP count of 100 SNPs (`--homozyg-snp 100`), at a density of 1kb per SNP (`--homozyg-density 1`), with no two SNPs more than 500kb apart (`--homozyg-gap 500`), and only 1 heterozygous genotypes tolerated per window (`--homozyg-window-het 0`) (112), performing scans without LD-based pruning (114). We then calculated the autosomal ROH-estimated

coefficient of inbreeding ( $F_{ROH}$ ) from the total ROH segment length divided by the total SNP-covered length across autosomes where ROH detection was possible (115, 116).

#### Kinship and relatedness

We measured kinship  $k$  between pairs of individuals using the KING-robust kinship estimator (117) on the GWAS cohort ( $N=2,097$  with any phenotype data; 2,197,656 pairs). The majority (99%) of pairs were unrelated ( $k<0$ ), and the average kinship score was  $-0.232 \pm SD:0.298$  (fig. S32). Only 28 pairs of dogs (0.0017%; 46 unique dogs) exceeded kinship of  $k=0.2$  (just under half-siblings).

#### Breed name standardization

Owner-reported breed names were standardized to unify those referring to the same breed and to correct misspellings. In addition to analysis as separate breed populations, breeds were assigned higher level groupings to check whether ignoring certain features that may not necessarily distinguish dogs into separate breeds (e.g., 'wirehaired dachshund' and 'longhaired dachshund'; various sizes of poodle) impacted the relationship between breed and survey data.

#### Breed standards, stereotypes, and popularity

The breed standard values for six physical traits (body size, ear shape, number of coat colors, white spotting, coat length, and coat type) were obtained from the American Kennel Club (53) or, for the non-AKC breeds, breed-specific clubs (see **Data and materials availability**). We collected three-word stereotypes from the American Kennel Club breed resources at [www.akc.org/dog-breeds](http://www.akc.org/dog-breeds) (52) and assigned breeds to breed groups based on information from the AKC official breed standards (53). The following sets of descriptors were treated as the same stereotypes: (A) {bright, clever, intelligent, smart, very smart}, (2) {devoted, loyal}, and (3) {energetic, exuberant, lively, peppy}. The breed group "non-sporting" was excluded because it potentially encompasses a broad spectrum of working functions (it is defined as "A diverse group of multifunctional dogs not generally regarded to be game hunters." (53)). We collated scores for each breed on ten behavioral characteristics from the "At a Glance" tables of the *Encyclopedia of Dog Breeds* (19). We used the mean number of American Kennel Club (AKC) registrations reported between 2000 and 2015 as a proxy for breed popularity in the United States (39).

#### Breed reference panel

We selected 871 purebred dogs representing 89 breeds with published genotypes for 185,805 SNPs from the Illumina CanineHD array (118). Owners submitted data for 12 purebred English shepherds with 214,220 SNPs genotyped on a custom high-density Illumina marker platform. Illumina CanineHD array data for 17 Golden Retrievers and 11 Leonbergers, for which we also have 30x whole genome sequencing data, were imputed to test the genotype concordance of imputed Illumina genotyping calls. We subsequently imputed genotypes for 32,438,672 SNPs from these arrays. An additional 109 dogs representing 43 breeds were genotyped at 1,011,254 SNPs on the Axiom Canine Genotyping Array Set A & B and imputed up to 32,438,672 SNPs. Among dogs enrolled in Darwin's Ark, 115 registered purebred dog samples from 54 breeds had low-pass sequencing data considered for inclusion. A total of 380 purebred dog samples spanning

74 breeds with whole genome sequencing calls were considered for inclusion in the breed reference panel. Among these, 194 overlapped with samples in the imputation panel.

We performed nearest neighbor checks using *PLINK* and for most breeds, found that the 3 genetic nearest neighbors for each dog were of the same breed. We identified 14 dogs with nearest neighbors from an additional breed, including 8 American Pit Bull Terriers nearby Staffordshire Bull Terriers. Three samples of Greyhound were discovered to be duplicates.

For each of these 101 breeds, 12 dogs were selected to be included in the breed reference panel, prioritized by raw data density and genetic diversity within the breed.

We retained SNPs which were genotyped in over 80% of dogs and at a minor allele frequency of at least 5% across dogs. These 7,065,140 SNPs shared 2,528,037 positions with the recombination-based genetic map measured in free-living village dogs (119). For the remaining unshared positions, centimorgan map distance values were linearly interpolated using  $R$  `approx()`. In order to select dense ancestry-informative markers, SNPs within 5 kb of index SNPs above  $F_{ST} = 0.15$  between reference breeds and with  $r^2 > 0.9$  were clumped (as *PLINK* `--clump` considers values below threshold for indexing,  $1 - F_{ST}$  was supplied to the clumping function). The final set of local breed ancestry markers contained 2,468,442 SNPs (on average, spanning 110 SNPs per 100 kb) and 1,212 dogs (101 breeds with 12 dogs per breed) with a total genotyping rate of 99.44%, which we used to perform admixture simulations. Similarly, sparser markers for global ancestry inference were obtained by clumping with 50 kb,  $F_{ST} > 0.15$ , and  $r^2 > 0.5$ , yielding 688,060 global ancestry markers.

#### Admixture simulations

We used a Monte Carlo approach (GitHub repo: lindaboettger/ancestry\_assignment) to generate simulated admixed individuals with known ancestry per haplotype, and then compared the known breed ancestry composition with global ancestry inferred via *ADMIXTURE* (120). To simulate admixed individuals, we performed  $N = 15$  generations of admixtures according to the following procedure.  $N+1$  random individuals from different breeds were selected to contribute to the admixture. With each iteration, recombination was simulated to incorporate a new individual. Recombination events were treated as a Poisson event occurring on average once every Morgan. The above simulation was run on 10 independently drawn data sets of 6 dogs per reference breed to create 1,000 admixed individuals of known ancestry. Genotype data from each set of simulated individuals was merged with the remaining 6 dogs per reference breed and filtered for SNPs in the global breed ancestry panel. We inferred global breed ancestry for simulated individuals using the supervised mode of *ADMIXTURE* (random seed = 43) supplied with reference population assignments. We correctly call breeds comprising  $>5\%$  of simulated ancestry  $>90\%$  of the time, and inferred ancestry correlates with true ancestry out to 12 generations of admixture ( $R_{\text{pearson}}=0.94$ ;  $p=2.2 \times 10^{-16}$ ).

#### Global ancestry inference

We performed unsupervised admixture analysis for 1,073,779 LD-pruned (50 kb and  $r^2 > 0.5$ ) biallelic SNPs genotyped in the Darwin's Ark genetic data set, using 23,613 SNPs on chromosome 38 for 5-fold cross-validation of  $K = \{1, 2, 3, 4, 5, 6, 7, 8, 9, 10, 10, 15, 20, 25, 50, 75, 100, 150, 200\}$  clusters to identify  $K$  between 50 and 100 as the optimal number of clusters for the Darwin's Ark genetic cohort (fig. S6). For the supervised admixture analysis, genotype data from all query dogs was merged with all reference breed data and filtered for SNPs in the global breed ancestry panel. Global ancestry from the 101 reference breeds were inferred using the supervised mode of *ADMIXTURE* (random seed = 43) supplied with reference population assignments. Population weights under 1% were discarded from individual ancestries.

#### Breed set assignments

We considered two scenarios in which a dog might present as purebred: (i) the dog was assigned a single owner-reported breed and (ii) the dog was assigned a single owner-reported breed and registered purebred status. Other dogs with no or two breeds reported were presumed to be non-purebred. For breeds included in the breed reference panel, we determined the rate at which owners correctly identified the predominant breed ancestry of their dog and the relationship between owner-reported breed and percent top breed (table S6). We assessed accuracy for the 880 dogs with only one reported breed, as well as for a subset of 304 dogs described as registered purebred and the remaining 1,186 presumably non-purebred dogs. Global ancestry inference assigned at least 85% of ancestry to a single breed in most (89.7%) registered purebred dogs, and therefore any dog with 85% or more breed ancestry was considered confirmed as purebreds by sequencing. Likewise, dogs with under 45% breed ancestry not matching their owner's report and not reported as a breed we cannot detect were considered mutts.

We defined three breed sets: (1) *confirmed purebred dogs* were either described as registered purebred by the owner, or confirmed by sequencing to have 85% or more ancestry from a single breed (3,637 dogs); (2) *candidate purebred dogs* included all confirmed purebred dogs and dogs with owner-reported ancestry from one breed not in disagreement with genetic breed ancestry, if available (9,009 dogs); (3) *mutts* were all other dogs including any dogs with <45% genetic breed ancestry in discordance with owner reported ancestry (9,367 dogs). Among 217 dogs with disagreement between owner reported breed and genetically inferred ancestry, 89 were reported as breeds absent from our reference panel and 90 were re-classified as mutts. Extrapolating from our analysis of dogs with genetic data, we expect that 89.7% of registered purebred and 58.2% of dogs with owner-reported ancestry from one breed would, if sequenced, have >85% ancestry called from their owner-defined breed. This is higher than the 3% expected by random chance from the mean probability of an owner guessing the breed correctly, for all dogs with breed confirmed by sequencing, given the assumption that owners guess breeds at rate corresponding to breed population frequency.

#### SNP-based heritability estimates

We used the Genome-wide Complex Trait Analysis (GCTA, version 1.92.3 beta 3) (56) software tool to calculate LD scores in 250kb regions using a block size of 10,000kb with an overlap of 5,000kb between blocks. In GCTA, we generated a genetic

relationship matrix (GRM) for the data set of 2,155 dogs, as well as multiple GRMs calculated from SNPs stratified into LD score quartiles (121). We used restricted maximum likelihood (REML) analysis for all factor and question scores and 14 physical traits using the GRM for all SNPs to obtain estimates of  $h^2_{\text{SNP}}$  for the sample set of all dogs. We calculated the LD-stratified estimates of  $h^2_{\text{SNP}}$  for the same traits except when more than half of the variance components were constrained.

We also computed the first 10 principal components from the GRM of all SNPs using GCTA and performed heritability analyses in unrelated dogs (no kinship > 0.2) using the LD-stratified GRM(s) plus the first 10 PC eigenvectors as quantitative covariates. Heritabilities estimated in this manner had nearly perfect positive correlation with those estimated without PC covariates ( $R_{\text{pearson}}=0.974$ ;  $p=1.1 \times 10^{-58}$ ) and an average fold change of  $0.08 \pm \text{SD}:0.43$  with nearly perfect overlap of confidence intervals except for Q64 Circles before pooping. Additionally, we performed heritability analysis in unrelated, highly admixed mutts having no breed ancestry detected over 45%. Unsurprisingly (given the much smaller sample size) these correlated less tightly with estimates on the full set of dogs ( $R_{\text{pearson}}=0.44$ ,  $p=0.0004$ ), with an average fold change of  $0.53 \pm \text{SD}:1.24$ , but the confidence intervals for most traits (92%) overlapped.

#### Analysis of variance

To assess how much of the variance in traits is explained by age, sex, size and breed, we ran an analysis of variance (ANOVA) 1-tailed analysis with all dogs > 1 year of age with age, sex, size, and breed information, using the `anova_test` function in R package `'rstatix'` 0.7.0, in R version 4.1.1. We tested both the candidate purebred and confirmed purebred classifications and included all breeds with  $\geq 5$  dogs. For the candidate dataset, we had 121 breeds and, on average,  $5968 \pm 332$  dogs per question/factor, and for the confirmed dataset, 78 breeds and  $2251 \pm 119$  dogs per question/factor. We used 2 different models to test how much of the variance in normalized factor and question scores was explained by age, sex, size and breed. For question 121 (the size question), which is the source of the size phenotypes, we used a model that excluded size: [value ~ breed + sex + age]. For all other questions we used [value ~ breed + sex + age + size]. We corrected for multiple testing using Benjamini-Hochberg procedure. To assess whether fur length explains any variance in Q21 (focus in distracting situations), we used the same procedure with the model [value ~ fur length + breed].

#### Predictive value of breed, age, and size

We calculated the improvement in prediction of behavioral traits afforded by information on the breed, age, and size of a given dog. To do so, we used a relative risk framework, asking, for example, by what fold information on any of these features could aid a prospective dog owner in identifying an individual dog with specified individual or combinations of behavioral traits, relative to a dog selected at random.

#### Interactive dashboard

We developed an interactive website for the public that illustrates the prevalence of particular traits in each breed. One version of the site shows the results for all eight behavioral factors, and the other, the results for the most heritable questions: Q17 H; Q54

(DOG retrieves objects); Q60 (DOG avoids getting wet); Q121 (When DOG is next to someone how high are HIS shoulders); Q123 (How much white fur does DOG have); Q124 (Is DOG's tail curly); Q125 (What is DOG's ear shape); Q127 (How long is DOG's fur on HIS back and sides). We grouped dogs in each breed into three groups based on their scores: “any” (all dogs); “negative” (dogs in the lower 25% quantile bound for all dogs; “positive” (dogs in the upper 25% quantile. We then empirically measured the frequency of all possible combinations of responses in each breed. We included both candidate and confirmed purebred dogs to maximize the number of breeds (minimum number of dogs / breed = 500). Input files for the website are included in data release (see **Data and materials availability**).

### Population Peculiarity Scoring (PPS)

We used permutation testing to test whether populations of dogs, as defined by breed or age, differed significantly in their survey responses from randomly sampled groups on any question or factor. All dogs with any survey responses were included. We used *R* version 4.0 and custom scripts (see **Data and materials availability**). For each permutation, for a given sample size *N* (table S14), we calculated the mean (the observed test statistic) for each question/factor for *N* dogs sampled from among dogs of each type. For each permutation, we also calculated the mean for a random sampling of size *N* from the full dataset (the permuted test statistics). We counted how often the observed test statistics for each population were higher than the permuted test statistics.

We ran a total of 500,000 permutations and summed the counts. We calculated the one-tailed empirical *p*-value as the fraction of random samples where the permuted statistic is as large or larger than as the observed test statistic, and converted (1-*p*) into a Z-score, using the standard *R* function `qnorm()`, that matched the direction of the original survey score. We calculated 2-tailed *p*-values corrected for multiple testing by counting how often each observed test statistic exceeded the maximum of all permuted statistics (i.e., over all questions or factors), or was less than the minimum, for each of the replicates (122). This max(T) permutation approach preserves the correlational structure between questions, and thus is more appropriate than a Bonferroni correction, which assumes all tests are independent. When calculating permutation *p*-values, we added a 1 to the numerator and denominator to account for misestimation of the *p*-value (123).

We assessed whether the number of dogs available for sampling influenced the PPS results and found a small but discernible effect in the candidate purebred analysis. For the candidate purebred dogs, we set the minimum # dogs required to 25, matching the size of each sampling. Thus, for some breeds, each “random sampling” included the same dogs. While this allowed us to produce scores for many more breeds (up to 62, compared to maximum of 44 if the minimum is 50), breeds with smaller numbers of dogs available for sampling tended to have slightly more extreme z scores. In breeds with fewer than 50 dogs,  $3.4 \pm 1.9\%$  of traits have significant PPS scores, compared to  $1.8 \pm 1.3\%$  ( $p_{\text{test}} = 0.00059$ ) for breeds with more dogs. Number of dogs available for sampling is weakly inversely correlated with absolute z score = -0.14 ( $p = 2.4 \times 10^{-35}$ ;  $N = 7,482$ ). We note that the correlation between number of dogs available for sampling and larger PPS z scores would have the effect of making breeds look more differentiated, rather than less,

and thus the effect of sample size is unlikely to alter our conclusion that the behavioral differentiation between breeds is subtle.

We quantified the effect using an analysis of variance (data S9). The magnitudes but not the directions of the permutation results were affected by the use of less stringent candidate purebred breed labels. The permutation z scores for candidate breeds were strongly correlated with scores for confirmed breeds (for factors, Pearson correlation = 0.959,  $p = 5.95 \times 10^{-18}$ ; for questions, Pearson correlation = 0.934,  $p = 2.3 \times 10^{-256}$ ). On average, the z scores from the confirmed purebred sets are  $0.82 \pm 0.61$  larger (in either direction) than the candidate purebred z scores (fig. S13).

We used the PPS results for candidate purebred dogs to assess the validity of breed stereotypes determined from three different sources (see *Breed standards, stereotypes, and popularity* section). For stereotype groups (descriptive words and historic working roles), we used the *t test* function in the *R* package *rstatix* version 0.7.0 (*R* version 4.1.1) to test the mean difference in PPS z scores between breeds in the group and not in the group. We excluded groups with fewer than 3 breeds from analysis. For quantitative stereotypes, we measured the spearman correlation between the PPS z scores and the stereotype score using the *cor()* function in the *R* package *stats* version 4.1.1. (*R* version 4.1.1). For both, we used the Benjamini-Hochberg procedure to correct for multiple testing.

#### MuttMix survey

To assess perceptions of breed ancestry in mixed-breed dogs by non-owner observers, we designed a survey hosted at [www.MuttMix.org](http://www.MuttMix.org) in which participants guess the three breeds detected at the largest percentage in each dog. The survey consisted of 30 mixed-breed dogs with ancestry assignments and one undeclared purebred dog (fig. S33). Owners of the 31 survey dogs were asked to provide a portrait and full body image, as well as a short video clip of the dog while in motion. In addition to the visual aids, owners indicated their dog's size relative to an average person via a visual graphic and noted other physical descriptions such as coat texture, markings or any concealed traits. The images and information provided by owners was consolidated and created into the MuttMix survey, where participants could guess the top three breeds.

Participants indicated whether they belong to the general public or are a dog professional and/or breeder. Participants were provided with 59 breed options to select as well as a “no choice” option for the third breed slot. Dogs were displayed in random order to participants. Participants were permitted to exit the survey at any time, return later, or leave the survey incomplete, but could not skip dogs. The survey launched on April 16th, 2018 and closed on June 16th, 2018, collecting responses from 26,639 people over a two month period. Survey data was compared to genetic breed ancestry, with any breed call below 5% removed; only breeds offered as survey options were examined.

To calculate the average total percentage of ancestry guessed correctly, we first calculated the percentage guessed correctly by each user for each dog individually by

summing the real percent ancestry attributed to their three breed guesses. We then calculated the mean of all these values.

To assess the accuracy of user guesses of breed ancestry for MuttMix dogs, we first counted the number of breed guesses for a given dog that were among the top three breeds detected by our breed ancestry inference for that dog (or in the top two, if only two breeds comprised >5% ancestry). We find that the rate at which MuttMix users guessed a given breed ancestry is strongly correlated to the popularity of that breed (fig. S20), with no significant correlation to the position of a given breed in the guess dropdown menu. The expected rate of accurate guesses was determined using the overall population percent ancestry assigned to the breed in the “Darwin’s Ark: Full Genetic Set” dataset (fig. S20). We calculated how often we expect to see each possible combination of breed guesses (N=32,509 for guesses for all 3 breeds; N=1,711 for guesses with just 2 breeds) by random chance if the guess rate for each breed is the overall population percent ancestry (table S2). For each dog, we then classified each set of breed guesses as 0 breeds correct, 1 breeds correct, 2 breeds correct or 3 breeds correct, and summed these to get the expected rate of guesses with 1+ breeds correct, 2+ breeds correct and 3 breeds correct. We then calculated the observed rate of guesses with 1+ breeds correct, 2+ breeds correct and 3 breeds correct for each dog, and then calculated the ratio of the observed rate to the expected rate (and did the same for guesses of just 2 breeds). We measured the significance of the difference between observed and expected correct guesses using the *chisq.test* function in the R package ‘stats’ version 4.1.1 (R version 4.1.1), and applied Benjamini-Hochberg correction (table S15).

To assess the importance of individual physical traits in participants’ breed choices, we compiled binary phenotypes for each of the above traits for each survey dog (see **Data and materials availability** for data files) and constructed a decision stump (a one-level decision tree) to assess how presence or absence of a given trait in a mutt impacted entropy among MuttMix guesses of the presence of a given breed ancestry. In particular, for each breed ancestry option, we calculated how well mutt phenotype for each of eight different traits (height, leg length, ear type, coat type, coat length, coat furnishings, white spotting, pigmentation) distinguished participant guesses of presence versus absence of that ancestry. For all breeds and all traits, we applied a leave-one-out analysis, omitting guesses for each mutt in series, to assess the impact of guesses for that mutt on entropy reduction. To calculate significance, we randomized trait assignments across mutts, then asked whether entropy reductions given true traits were greater than those expected from randomly assigned traits.

#### Linear mixed-effects regression models (LMERs)

We constructed linear mixed effects regression (LME) models using the R package ‘lme4qtl’ (124) (extending upon the package ‘lme4’ (125)) (see **Data and materials availability** for script file) to measure the relationship of genetic breed ancestry with behavior question responses, normalized behavioral factor scores, and physical traits. Dogs with >45% ancestry from any one breed were excluded to eschew bias from recent breed admixture and purebred dogs. We included only breeds with a standard deviation  $\geq 5\%$  ancestry across dogs carrying that breed. Question and factor scores were treated as

the independent variable. Breed ancestry from each of the remaining 68 breeds were scaled and treated as fixed effects. Three age brackets were considered as random effects: 2 years and under, between 2 and 12 years, and 12 years and older. The covariance matrix for genetic relationships between individual dogs was produced from the genetic relationship matrix (GRM) (see *SNP-based heritability estimates*). As the GRM was not positive definite, we generated a close positive definite version of the covariance matrix using the *R* package `'psych'` function `cor.smooth()` to provide the random effects of relatedness. A total of 1,002 dogs were included.

For each factor, we built a model with restricted maximum likelihood (REML) to obtain unbiased estimates, standard deviations, and Wald statistics (*t.val*) for the fixed effects of breed on factor score. We performed analysis-of-variance on each factor model to obtain the breed F-statistics. We also constructed each factor model using maximum likelihood (ML) with and without each breed, and performed an analysis of variance to obtain the likelihood ratio for each breed. We report *p*-values for the likelihood tests between the ML models, but not for REML models in which the derivation of *p*-values is not appropriate (126).

We obtained the proportion of variance explained by the fixed effects (breed ancestries) as the marginal Nakagawa's  $R^2$  for each factor modeled with and without restricted maximum likelihood (127) (data S14). The conditional Nakagawa's  $R^2$ , which is the variance explained by the random effects, which are the age bracket and kinship covariance matrix, and fixed effects, which are the breed ancestries, could not be ascertained for all factors due to singularity in some models from the random effects structure being too complex. The source of structure complexity derived from the correlation between relatedness and breed ancestry, and upon removing the random effects of relatedness, only one factor model (factor 5) was singular.

#### Map of genes and open chromatin regions

We matched dog genes to human homologs with Ensembl gene annotation, GRCh38 (version 104.38) and CanFam3 (version 104.31), which gave us a set of 16,329 human gene-dog gene pairs for gene annotation.

For functional annotation of coding and non-coding regions, we derived 179,541 representative open chromatin regions (rOCRs) from 24 ATAC-seq datasets downloaded from BarkBase portal (<http://www.barkbase.org/>) (102). ATAC-seq datasets are processed using the standard ENCODE ATAC-seq pipeline (GitHub repo: ENCODE-DCC/atac-seq-pipeline). In short, trimmed FASTQ reads were aligned to the canine reference genome canFam3 using Bowtie2 (128). SAMTools and picard-tools were used for post-alignment filtering. MACS2 (129) and IDR (<https://sites.google.com/site/anshulkundaje/projects/idr>) were used for peak calling and filtering.

We used all samples with an IDR FRiP score greater than 0.05 (N=22). ATAC-seq IDR peaks were filtered based on signal (CPKM >10 percentile of all qualified samples), length (>150bp) and FDR (<10<sup>-5</sup>). We also included peaks from a skeletal muscle and a

occipital cortex sample with a more stringent FDR threshold ( $<10^{-10}$ ) for better tissue diversity. A previously described (101) scheme was used to cluster ATAC-seq IDR peaks across samples, and the peak with the highest signal within each cluster was selected as the representative open chromatin region (rOCR) of the cluster.

#### Genome wide association studies (GWAS) using mixed linear models

We performed genome-wide mixed linear model-based associations on our Darwin's Ark cohort genetic data set (see **Data and materials availability**) using the "leave-one-chromosome-out" approach (MLMA-LOCO) implemented in GCTA (version 1.92.3 beta 3) by calculating multiple GRMs so that the model will exclude the random effects from the chromosome of each candidate SNP (fixed effect). Included were categorical covariates for sex and data type (genotyping or low-pass sequencing), as well as quantitative covariates for height and age for non-morphological traits. We used the human thresholds for genome-wide significance ( $p=5 \times 10^{-8}$ ) and suggestive associations ( $p=1 \times 10^{-6}$ ) owing to the similarity in linkage block length between humans and diverse dogs (1, 76).

To define regions of association, SNPs in linkage disequilibrium ( $r^2>0.2$  and  $r^2>0.5$ ) and within range (250 kb) of associated index SNPs were clumped and annotated via *PLINK* --clump, referencing the gene map described above, and reported results in data S16. We also performed clumping for SNPs in linkage at  $r^2>0.8$  within 250kb to compare the sizes of mapped regions (clumped for  $r^2>0.8$  within 1Mb) with osteosarcoma-associated regions found by within-breed studies (83) in greyhounds (22, 22, 96, 90, 372, 82, 182, 72, 32, 198, 52, 105, 1304, and 72 kb), Rottweilers (1208, 330, 18, 19, 21, 487, 131, 16, 20, 26, 1988, 509, 54, 108, and 21 kb), and Irish wolfhounds (746, 1588, 1382, and 737 kb). We summarized the mean, median, and 25% and 75% quantiles for these osteosarcoma-associated regions and our suggestive ( $p=1 \times 10^{-6}$ ) associated regions for physical traits and behavioral traits, and did not summarize any single-SNP associations that had no SNPs in linkage. We found that our regions extend to a median 5.6kb (Q25-75%=2.0-14kb, mean 16.8kb) around suggestive behavioral loci and 5.7kb at physical trait loci (1.4-22kb, mean 26.2kb), and that the intra-breed associations for osteosarcoma mapped at median ranges of 86kb (Q25-75%=57-162kb) in greyhounds, 54kb (21-409kb) in rottweilers and 1Mb (743kb-1.4Mb) in Irish wolfhounds.

The genomic inflation factors at 50th percentile for each study were calculated using the Python package *'scipy'*. Genomic inflation factor  $\lambda = \text{np.nanmedian}(\text{chdtri}(1, 1 - p\_array)/\text{chdtri}(1, 1 - 0.5))$ , where *p\_array* is the array of GWAS *p*-values.

To assess how much phenotypic variance was explained by associated regions, we derived genetic relationship matrices for the set of SNPs clumped for suggestive association ( $p=1 \times 10^{-6}$ ) with each trait and the set of all other SNPs, and estimated the partitioned heritability to measure the proportion of total heritability unattributed by discovered associations.

Just as with the heritability estimates, we also ran mixed linear model-based associations fitting the first 10 principal component eigenvectors as covariates and

excluding 46 related individuals to achieve added control over population structure. Overall, we found small shifts in the top associated loci in this context. Out of 588 associations (1,388 SNPs of  $p < 1 \times 10^{-6}$ ) detected in the original studies for behavioral question and factor scores, 71/109 SNPs (65.1%) were still significant ( $p < 5 \times 10^{-8}$ ) and 1,145/1,388 SNPs (82.5%) remained suggestive ( $p < 1 \times 10^{-6}$ ). We report in data S16 when any associated locus did not replicate in this context ( $p > 1 \times 10^{-6}$ ).

In the main text, we present the association results without PCs fitted as it is not clear that including PCs is more accurate and doing so may constitute an over-correction. The mixed linear model-based association (MLMA) analysis already controls for population stratification and cryptic relatedness as well or better than the corrections offered by principal components regression (130,131). Currently, PC-based approaches are used when MLMA is not computationally feasible (132). Principal component regression can be regarded as an approximation of a linear mixed model and may largely duplicate corrections already incorporated into the analysis (133). Furthermore, unlike using kinship, selecting the number of PCs to include is subjective and could thereby bias results (134).

#### Size prediction model

We used responses to question 121, “When DOG is standing next to someone of average height, how high are HIS shoulders?” with the answer options of ankle high or shorter (“0”, 3% of dogs), calf-high (“1”, 30%), knee-high (“2”, 40%), thigh-high (“3”, 24%), or hip-high or higher (“4”, 3%), as phenotypes for building predictive models for body size.

A set of 1,730 adult dogs over 18 months old from the Darwin’s Ark cohort was used as the training and testing set. To assess the power of the prediction model, we did ten-fold cross validation in which we split the data into 10 folds. At each round, 9 folds of dogs were taken as the training set, and the rest were taken as the testing set. The validation set includes a cohort of dogs recruited from the 2017 Somerville Dog Festival in Somerville, MA, with height to withers in inches measured at the event and a cohort of dogs in which owners were instructed to measure the height from their dog’s shoulder to the ground (see *Validation of size phenotypes*). In total, 95 dogs were included in the validation set in addition to the training and testing set. We converted these measurements to the height question Likert scale by linear interpolation where {ankle-high: 0 = 4 in, calf-high: 1 = 10 in, knee-high: 2 = 18 in, thigh-high: 3 = 25 in, hip-high: 4 = 35 in from floor} according to body measurements of a 5’4” female human.

At each round, we performed a genome-wide association study on the training set, chose the predicted SNPs based on their strength of association, and built a random forest regression model using the selected SNPs. Once the model was built, we assessed prediction accuracy using the testing set to get the prediction accuracy and mean squared error. The final prediction accuracy and mean squared error were averaged across the ten testing sets. We iterated through different  $p$ -value cutoffs, from  $1 \times 10^{-8}$  to  $1 \times 10^{-3}$ , when selecting predicted SNPs and chose the cutoff with the best performance on the testing set. We built the model with the *R* package ‘*randomForest*’ and selected a  $p$ -value cutoff ( $1 \times 10^{-5}$ ) and *mtry* and *ntree* parameters (576 and 500, respectively, determined by

iteration) to achieve the best model performance. We built a single model with 1,730 dogs and 2,733 SNPs and validated this model using our validation set of 95 dogs independent from the 1,730 adult dogs described above as the training and testing sets.

Our random forest regression model predicted the size to be numeric and we then rounded the decimal numbers to integers to match the survey measurement from 0 to 4. Besides building models based on GWAS-selected SNPs, we built models based on randomly selected SNPs as a control. We followed the same pipeline by splitting the data into ten folds. At each round, we randomly selected a matched number of SNPs to each  $p$ -value cutoff and built models on this. Prediction accuracy and mean squared error were calculated the same way described above.

#### Gene sets enrichment analysis

To assess the enrichment of sets of functionally related genes, we applied MAGMA (version 1.09) (91) on the GWAS summary statistics for 136 traits, including 14 physical traits, 114 behavioral questions, and 8 behavioral factors. MAGMA calculated gene-wide  $p$ -values by combining the  $p$ -values of all SNPs inside genes while accounting for gene size, number of SNPs in a gene, and LD. Using gene-based  $p$ -values, it tested for enrichment of association signals in genes belonging to the same set.

Gene sets were compiled from three main sources. First, curated neuropsychiatric genes. The autism spectrum disorder (ASD) gene set included 820 genes from the SFARI database which centers on genes implicated in autism susceptibility (88). The obsessive-compulsive disorder (OCD) gene set comprised 62 manually curated genes from OCDB, a database collecting genes, miRNAs and drugs for OCD (87). The schizophrenia (SCZ) gene set combined genes from two studies, the PGC2 GWAS in 2014 (89) and the UK CLOZUK GWAS in 2018 (90), which gave us a total of 371 genes. Second, to test whether dog size associated loci are enriched in GWAS for dog non-physical traits, we compiled a set of dog size-associated regions based on our size GWAS, the final set contains 75 regions with 4.6Mb in total. Third, top genes expressed in GTEx tissues (85). We compiled a GTEx gene set by choosing the top 100 expressed genes in 25 tissues and 13 brain subregions. For arteries, brain, cervix, colon, esophagus, heart, kidney, and skin that were sequenced at subregion level in GTEx, we merged the subregions into single tissue by taking the average as the expression level for each gene, then chose the top 100 genes. We reported raw  $p$ -values from MAGMA for each GWAS-gene set pair, as well as gene-wide  $p$ -values for significant enrichment (data S17).

#### Genetic differentiation of breeds

We defined a set of 27,674,130 SNPs genotyped in at least 80% of dogs and 50% of wolves. Samples from Darwin's Ark were assigned either to a breed population determined by ancestry inference ( $\geq 85\%$  breed) or labeled as 'other\_dog'. All available sequencing and imputed array data collected from purebred samples were assigned to their respective populations (data S4). We calculated genome-wide normalized population branch statistics (PBS, implemented in the Python package 'scikit-allele') using the Hudson estimator of fixation ( $F_{ST}$ ) for each breed ( $N \geq 12$  dogs) relative to dogs overall and wolves in sliding windows of 100kb by 10kb containing at least 10 SNPs (92, 135, 136). Across all windows, the genome-wide empirical  $p$ -values based on rank

relative to other windows  $((r+1)/(n+1))$  were calculated for all test statistics (122). A summary of the per-breed population branch statistic is in data S18.

For each trait-associated locus ( $p < 1 \times 10^{-6}$ ) from our genome-wide association studies, we permuted the region of combined overlapping LD-based clumps  $\sim 100,000$  times on the same chromosome using BEDTools *shuffle* function, mapped with BEDTools *map* the max(PBS) for each real locus against the distribution of permuted loci for each breed (data S19), and generated z scores. We divided locus tests into physical trait, behavioral question, and behavioral factor associations, and performed a one-tailed Student's t-test for whether the observed max(PBS) in associated loci exceeded that which we expect by random chance, and corrected for multiple testing using the Benjamini-Hochberg procedure (data S20).

We also tested whether the allele frequencies at the most associated SNPs tended to differ more in breeds than at SNPs sampled at random across the whole genome, as might be expected if traits were breed-differentiated (fig. S34). For each SNP, we calculated the max  $F_{ST}$  observed between one of the top ten breeds and the full dog population. We measured whether SNPs associated with behavioral traits and physical traits tended to have higher max  $F_{ST}$  than 29,903 randomly sampled SNPs using a one-sided t-test (*R* package *'stats'* version 4.1.1). For physical traits, the maximum  $F_{ST}$  observed for the top SNP in each locus (1mb) was slightly higher than for random SNPs (mean = 0.150 vs. 0.145; t-test  $p_{1-sided} = 0.026$ ) but this was not true at behavioral trait loci (mean = 0.142 vs. 0.145; t-test  $p_{1-sided} = 0.95$ ). For physical traits, the most strongly associated loci ( $p < 1 \times 10^{-12}$ ) tended to have higher breed  $F_{ST}$ s, consistent with breed differentiation (mean = 0.33 vs. 0.145; t-test  $p_{1-sided} = 0.0023$ ).

## Supplementary Text

### Marketing of DNA tests for breed ancestry

To determine whether breed testing was being marketed as a behavioral predictor, we searched the most popular genetic testing services and media articles for references to determining behavior, personality or trainability from a DNA test and found several examples:

#### A. Wisdom Panel:

“Consider learning more about their breed background with a Wisdom Panel™ DNA test. The insights you'll gain will allow you to tailor training and care to your dog's unique needs and preferences—helping you build your special bond.”

Source: Why dogs have favorite people (and how to make sure your pup picks you).

[https://web.archive.org/web/20210705161645if\\_/https://www.wisdompanel.com/en-us/blog/why-dogs-choose-favorite-people](https://web.archive.org/web/20210705161645if_/https://www.wisdompanel.com/en-us/blog/why-dogs-choose-favorite-people) (2021).

#### B. Amazon (marketing for Embark):

“Seeing the breeds your dog inherited will help you understand their personality along with what keeps them happy. Do they need a lot of exercise? Are they food-motivated? Do they like a good brain tease? Adapt your care routine based on their breed results.”

Source: Embark | Dog DNA Test | Breed & Health Kit | Breed Identification & Canine Genetic Health

Screening. <https://web.archive.org/web/20210705162556/https://www.amazon.com/dp/B01EINBA76>

C. Orivet Genetic Petcare:

“Collect your own Dog's DNA with a simple cheek swab. Orivet will compare your dog's DNA to hundreds of genetic markers of the most common known breeds to uncover ... Insights into Your Dog's Personality and Behaviour”

Source: Orivet Genetics.

<https://web.archive.org/web/20210122163410/https://www.orivet.com/store/canine-mixed-breed-screen/dog-breed-identification-test>.

D. DNA My Dog:

“DNA My Dog's simple cheek swab DNA test lets you learn the breeds in your dog and gain insight into the unique genetic background of your dog including the history of their breed, personality traits, exercise levels, and so much more!”

Source: DNA My Dog: Fast, easy and completely painless.

<https://web.archive.org/web/20210503213607/https://dnamydog.com/>.

E. VCA Pet Hospitals:

“Every purebred has certain established physical and personality traits that provide owners with an idea of the type of pet they are getting. Knowing the breeds that go into a mix can help the owners make better guesses about the size, temperament, energy levels, and exercise requirements their unique pet may have.”

Source: Genetic (DNA) Testing.

<https://web.archive.org/web/20200926224943/https://vcahospitals.com/know-your-pet/gene>

Overview of sample sizes and inclusion/exclusion criteria for all analyses

The following describe the source of each data set and samples, the inclusion and exclusion criteria, and maximum final sample size for all analyses. Several analyses vary in sample size depending on how many dogs have survey responses for a given trait.

| <b>Data Set</b>                                   | <b>Criteria</b>                                                                                               | <b>Sample Size</b> | <b>In Figure 1F</b>        |
|---------------------------------------------------|---------------------------------------------------------------------------------------------------------------|--------------------|----------------------------|
| Darwin's Ark:<br>Full Survey Set                  | Enrolled prior to November 15, 2019                                                                           | 18,385 dogs        | surveyed                   |
| Darwin's Ark: Survey<br>Set with Covariates       | Dogs in “Darwin's Ark: Full Survey Set”<br>phenotyped for age, sex, and height                                | 14,327             | sex, age, and<br>size info |
| Phenotype Validation:<br>Concordance with DPQ     | Owner completed all survey questions<br>derived from published Dog Personality<br>Questionnaire               | 10,253 dogs        |                            |
| Phenotype Validation:<br>Owner-measured<br>Height | Owner completed a size measurement<br>worksheet and responded to size survey<br>question                      | 337 dogs           |                            |
| Phenotype Validation:<br>Staff-measured Height    | Dog was measured at in-person event                                                                           | 38 dogs            |                            |
| Phenotype Validation:<br>Breed-average Height     | Owner reported dog to be a purebred of a<br>breed with average heights reported by<br>kennel club (90 breeds) | 2,025 dogs         |                            |

|                                            |                                                                                                                                                       |                                                             |                 |
|--------------------------------------------|-------------------------------------------------------------------------------------------------------------------------------------------------------|-------------------------------------------------------------|-----------------|
| Exploratory Factor Analysis: Discovery Set | Owner answered the first 110 survey questions                                                                                                         | 10,253 dogs                                                 |                 |
| Exploratory Factor Analysis: Scored Set    | Discovery set and any dog with responses to >80% of first 110 questions                                                                               | 16,522 dogs                                                 |                 |
| Mendel's Mutts                             | Dogs of unknown breed ancestry that underwent high coverage, whole genome sequencing                                                                  | 27 dogs                                                     |                 |
| Darwin's Ark: Full Genetic Set             | Dogs genotyped or sequenced prior to November 15, 2019                                                                                                | 2,155 dogs                                                  | genetic data    |
| Darwin's Ark: Genotyped Set                | Dogs genotyped on the Axiom Canine Genotyping Array Set A & B prior to adoption of low-pass sequencing approach                                       | 440 dogs                                                    |                 |
| Darwin's Ark: Low-pass Set                 | Dogs with low coverage genome sequencing on Gencove platform                                                                                          | 1,715 dogs                                                  |                 |
| Heritability Analysis                      | In "Darwin's Ark: Full Genetic Set" and in "Darwin's Ark: Survey Set with Covariates", and phenotyped for trait                                       | varies by trait, at most 1,967 dogs                         |                 |
| Breed Classification: Confirmed Purebred   | Either described as registered purebred by the owner, or confirmed by sequencing to have 85% or more ancestry from a single breed                     | 3,637 dogs                                                  | confirmed breed |
| Breed Classification: Candidate Purebred   | All confirmed purebred dogs ("Breed Classification: Confirmed Purebred") as well as dogs with owner-reported ancestry from one breed                  | 9,009 dogs                                                  | candidate breed |
| Breed Classification: Mutt                 | All dogs not classified as either confirmed or candidate purebred.                                                                                    | 9,376 dogs                                                  | mutt            |
| Breed Classification: Highly Admixed Mutt  | All dogs in "Darwin's Ark: Full Genetic Set" with <45% ancestry from any single breed in admixture analysis.                                          | 1,071 dogs                                                  |                 |
| Analysis of Variance                       | In "Breed Classification: Candidate and Confirmed Purebred" and in "Darwin's Ark: Survey Set with Covariates" and in "Darwin's Ark: Full Genetic Set" | 6,797 dogs                                                  | ANOVA pool      |
| Analysis of Variance: Confirmed Set        | In "Breed Classification: Confirmed Purebred" and in "Darwin's Ark: Survey Set with Covariates". Phenotyped for trait in question.                    | varies by trait, on average 2,251±119 dogs across 78 breeds |                 |

|                                                      |                                                                                                                                                                                           |                                                              |           |
|------------------------------------------------------|-------------------------------------------------------------------------------------------------------------------------------------------------------------------------------------------|--------------------------------------------------------------|-----------|
| Analysis of Variance: Candidate Set                  | In “Breed Classification: Candidate and Confirmed Purebred” and in “Darwin’s Ark: Survey Set with Covariates”. Phenotyped for trait in question.                                          | varies by trait, on average 5,968±332 dogs across 121 breeds |           |
| Relative Risk Analysis                               | In “Breed Classification: Candidate and Confirmed Purebred” and phenotyped for trait in question.                                                                                         | varies, at most 266 dogs for a breed x factor pair           |           |
| Population Peculiarity Scoring                       | All dogs in “Darwin’s Ark: Full Survey Set”. Groupings described in methods.                                                                                                              | 18,385 dogs                                                  | PPS pool  |
| LMER Analysis                                        | Dogs in “Darwin’s Ark: Survey Set with Covariates”, “Exploratory Factor Analysis: Scored Set”, and in “Breed Classification: Highly Admixed Mutt”                                         | 1,002 dogs                                                   | LMER pool |
| MuttMix Survey: Dogs                                 | Dogs in “Darwin’s Ark: Low-pass Set” or “Mendel’s Mutts”. Owners did not know their dog’s ancestry and submitted photos and videos.                                                       | 31 dogs                                                      |           |
| MuttMix Survey: Participants                         | All participants                                                                                                                                                                          | 26,639 people                                                |           |
| Genome-wide Association Analysis: All Dogs Set       | In “Darwin’s Ark: Full Genetic Set” and in “Darwin’s Ark: Survey Set with Covariates”. Phenotyped for the trait in question.                                                              | varies by trait, at most 1,967 dogs                          | GWAS pool |
| Genome-wide Association Analysis: Highly Admixed Set | In “Breed Classification: Highly Admixed Mutt” and in “Darwin’s Ark: Survey Set with Covariates”. Phenotyped for the trait in question.                                                   | varies by trait, at most 1,071 dogs                          |           |
| Size Prediction Models: Training and Testing Set     | In “Darwin’s Ark: Full Genetic Set” and phenotyped for height. Dogs younger than 18 months were excluded.                                                                                 | 1,730 dogs                                                   |           |
| Size Prediction Models: Validation set:              | In “Darwin’s Ark: Full Genetic Set” and either "Phenotype Validation: Owner-measured Height" or "Phenotype Validation: Staff-measured Height". Dogs younger than 18 months were excluded. | 95 dogs                                                      |           |

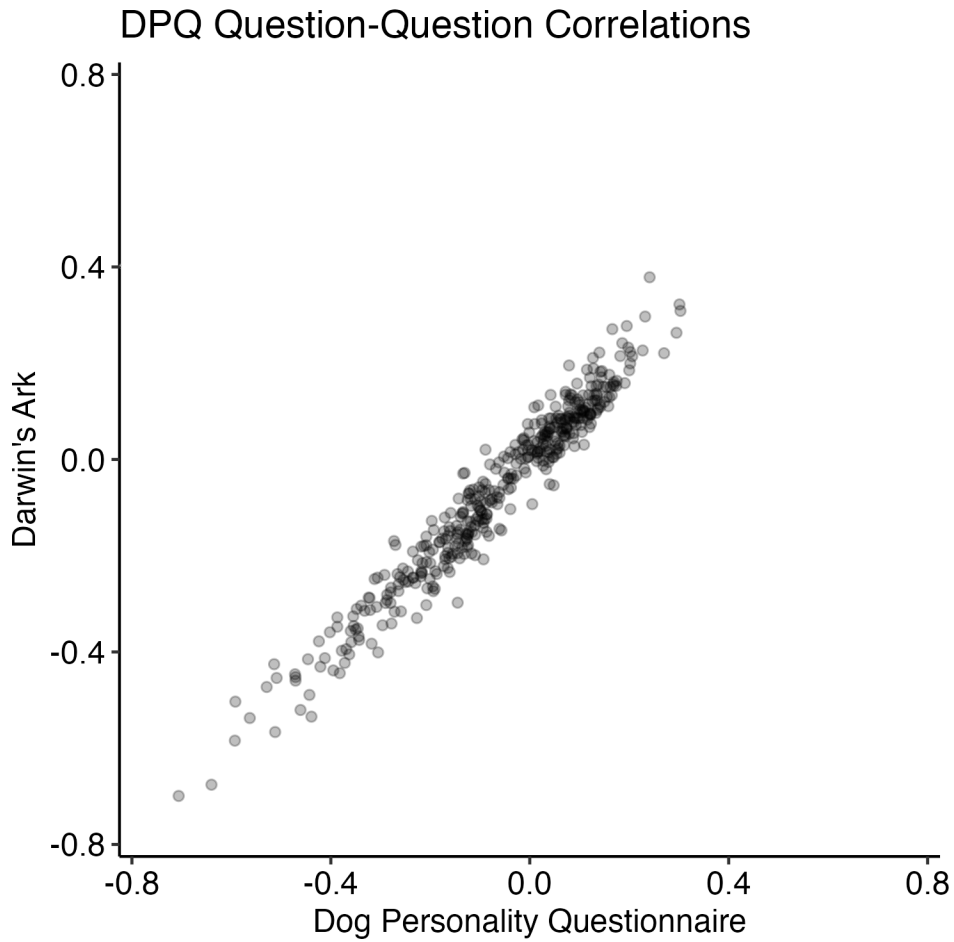

**Fig. S1. Concordance between original Dog Personality Questionnaire (DPQ) and Darwin's Ark implementation of DPQ items.** The Dog Personality Questionnaire (DPQ) published question x question correlation data from 2,556 dogs for 48 questions also included in Darwin's Ark (37). We extracted the correlation distances ( $d = 1 - |r|$ ) for responses from 10,254 dogs in Darwin's Ark and performed a Mantel's test between the DPQ and the Darwin's Ark correlation distances using *R* package `ade4` with 100,000 replicates. The correlation was nearly perfect (Mantel's correlation=0.95;  $p = 1 \times 10^{-7}$ ).

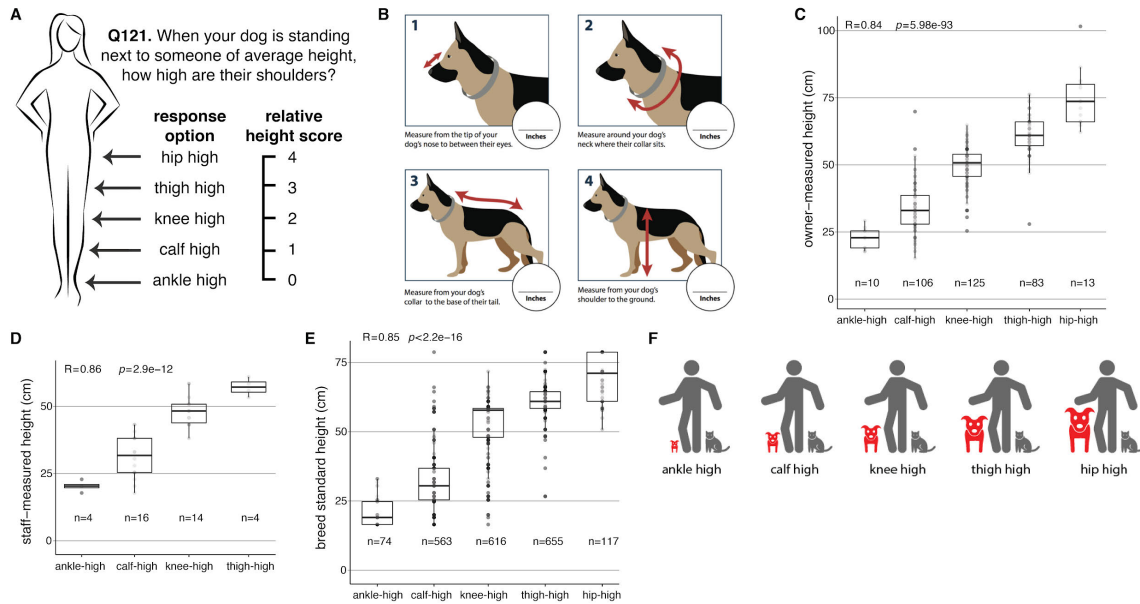

**Fig. S2. Validation of surveyed size phenotypes against real measurements and reference data.** (A) Darwin's Ark question 121 asks owners to select their dog's shoulder height relative to an average person on a five-step scale, with the options from "ankle-high or shorter" to "hip-high or higher". The survey response is converted into a relative height score ranging from 0 to 4. (B) For a subset of dogs, we asked owners to measure their dogs using a measuring tape and worksheet we provided. Panel 4 (height-to-withers) is the measurement coarsely captured by question 121. (C) Owner-measured height-to-withers is strongly correlated with owner responses on question 121 ( $N=337$  dogs;  $R_{\text{pearson}}=0.84$ ;  $t=28.885$ ,  $df=335$ ,  $p=5.98 \times 10^{-93}$ ). (D) Staff-measured height-to-withers for 38 dogs (collected at the Somerville Dog Festival in 2017) is strongly correlated with owner responses on question 121 ( $N=38$  dogs;  $R_{\text{pearson}}=0.86$ ;  $t=10.284$ ,  $df=36$ ,  $p=2.9 \times 10^{-12}$ ). (E) Breed average height, as defined in the AKC breed standard, is strongly correlated with owner responses on question 121 for purebred dogs ( $N=2,025$ ;  $R_{\text{pearson}}=0.85$ ;  $t=71.268$ ,  $df=2,023$ ,  $p<2.2 \times 10^{-16}$ ). (F) For the 31 dogs in MuttMix, participants were given each dog's size on the Q121 scale, as illustrated using the graphic shown.

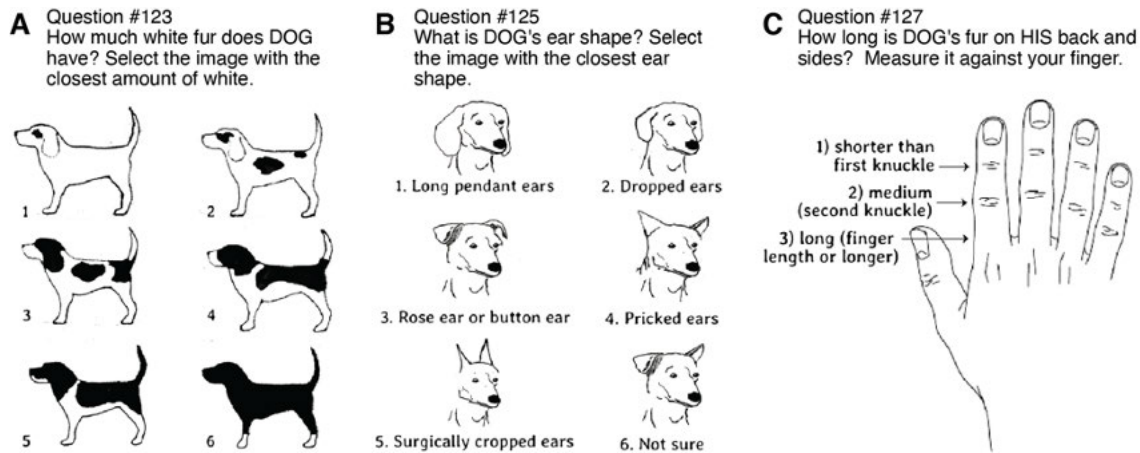

**Fig. S3. For three physical trait questions other than size (table S1), owners were asked to choose from a range of possible options shown in an accompanying image.** Questions were designed to be as easy to answer as possible. **(A)** For question 123 (white coat color), options range from all white to all black. Images were sourced from (137). **(B)** For question 125 (ear shape), options range from long and dropped to pricked. Two responses (surgically cropped ears and not sure) were excluded from subsequent analyses. **(C)** For fur length, owners are asked to respond using an easy-to-access measuring tool - their own finger. One other physical trait had multiple options but did not have an accompanying image. For coat color (not shown) owners chose one or more options from a list of colors including: (1) white; (2) red (from pale peach to dark red or liver colored); (3) yellow (from pale cream to orange, gold, fawn, or wheaten); (4) gray (slate, blue gray, charcoal, or silver); (5) chocolate brown; (6) pure black; (7) merle; (8) brindle.

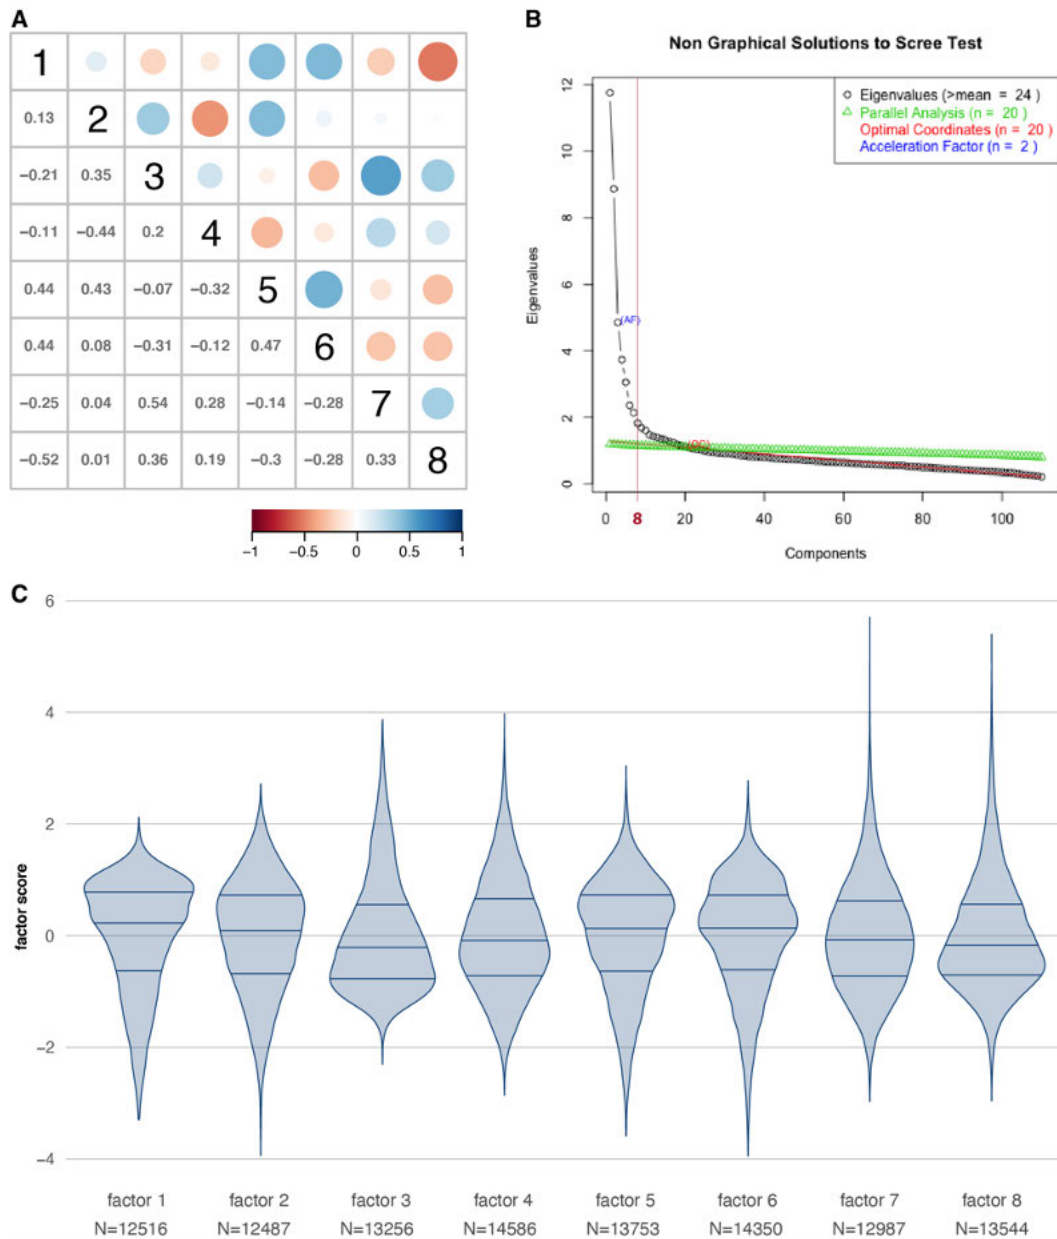

**Fig. S4. Exploratory factor analysis.** To reduce the dimensionality of the survey data, and identify underlying associations between questions, we performed exploratory factor analysis on 1,127,830 total survey responses from 110 questions for 10,253 dogs. **(A)** Between-factor correlations show most are only weakly or moderately correlated. Factor numbers are listed along the diagonal, and Pearson's  $r$  values below the diagonal. **(B)** Scree plot for survey data used to predict optimal number of factors; test algorithms include eigenvalues, parallel analysis, optimal coordinates, and acceleration factor. The first 8 factors explained a cumulative 24.26% of variance. **(C)** Distribution of factor scores for each factor in Darwin's Ark: Full Survey Set, with the three horizontal lines marking quantiles 0.25, 0.5 and 0.75.

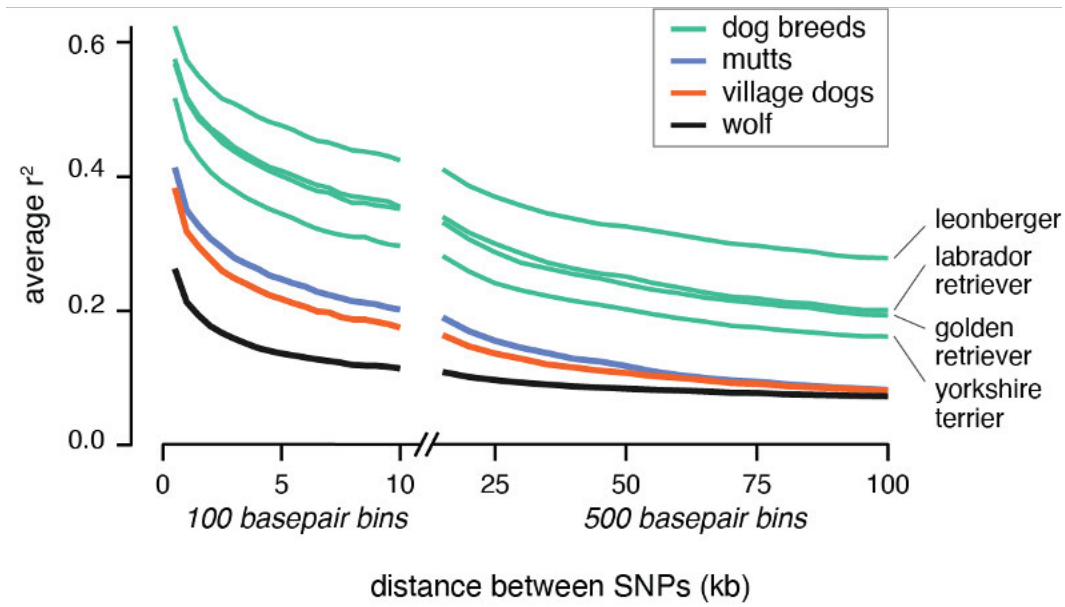

**Fig. S5. Decay of linkage disequilibrium (LD) in dog populations with different histories and in wolves.** LD is shorter in mutts (blue) than in dog breeds (green) but slightly longer than in outbred village dogs (red) and substantially longer than in wolves (black). For each population, 25 dogs were chosen at random from all dogs/wolves in the population. We assessed the extent of LD by measuring  $r^2$  between each of 20,000 randomly selected SNP and all variants with minor allele frequency  $> 0.025$  within 100kb of the index SNP.

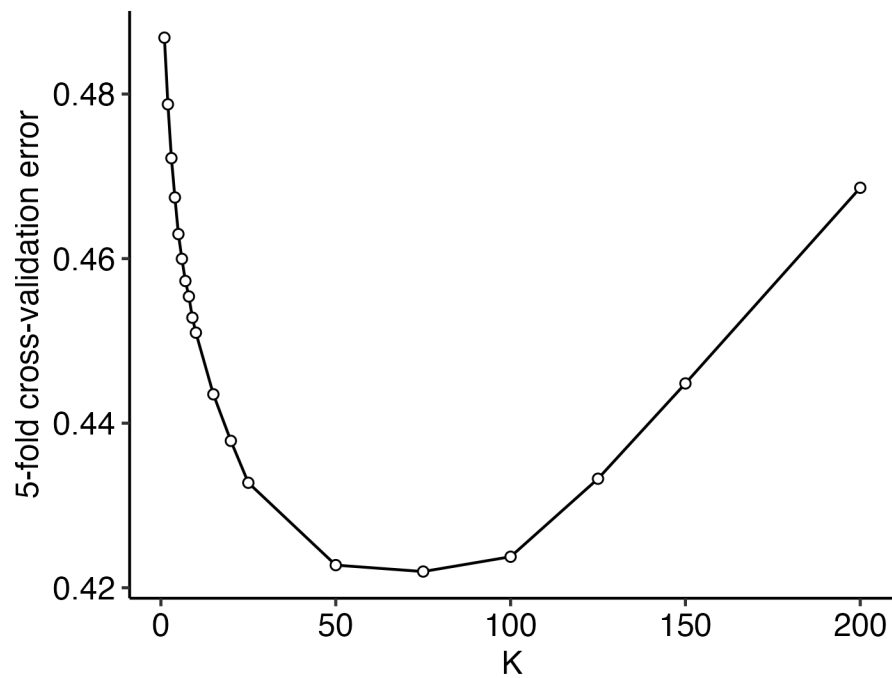

unsupervised ADMIXTURE analysis on chromosome 38  
with LD-based pruning (50kb,  $r^2 > 0.5$ )

**Fig. S6. Cross-validation of unsupervised admixture analysis in the Darwin's Ark cohort (N=2,155).** We tested a wide range of cluster numbers ( $K$ ) and achieved the lowest 5-fold cross validation error between  $K= 50$  and 100.

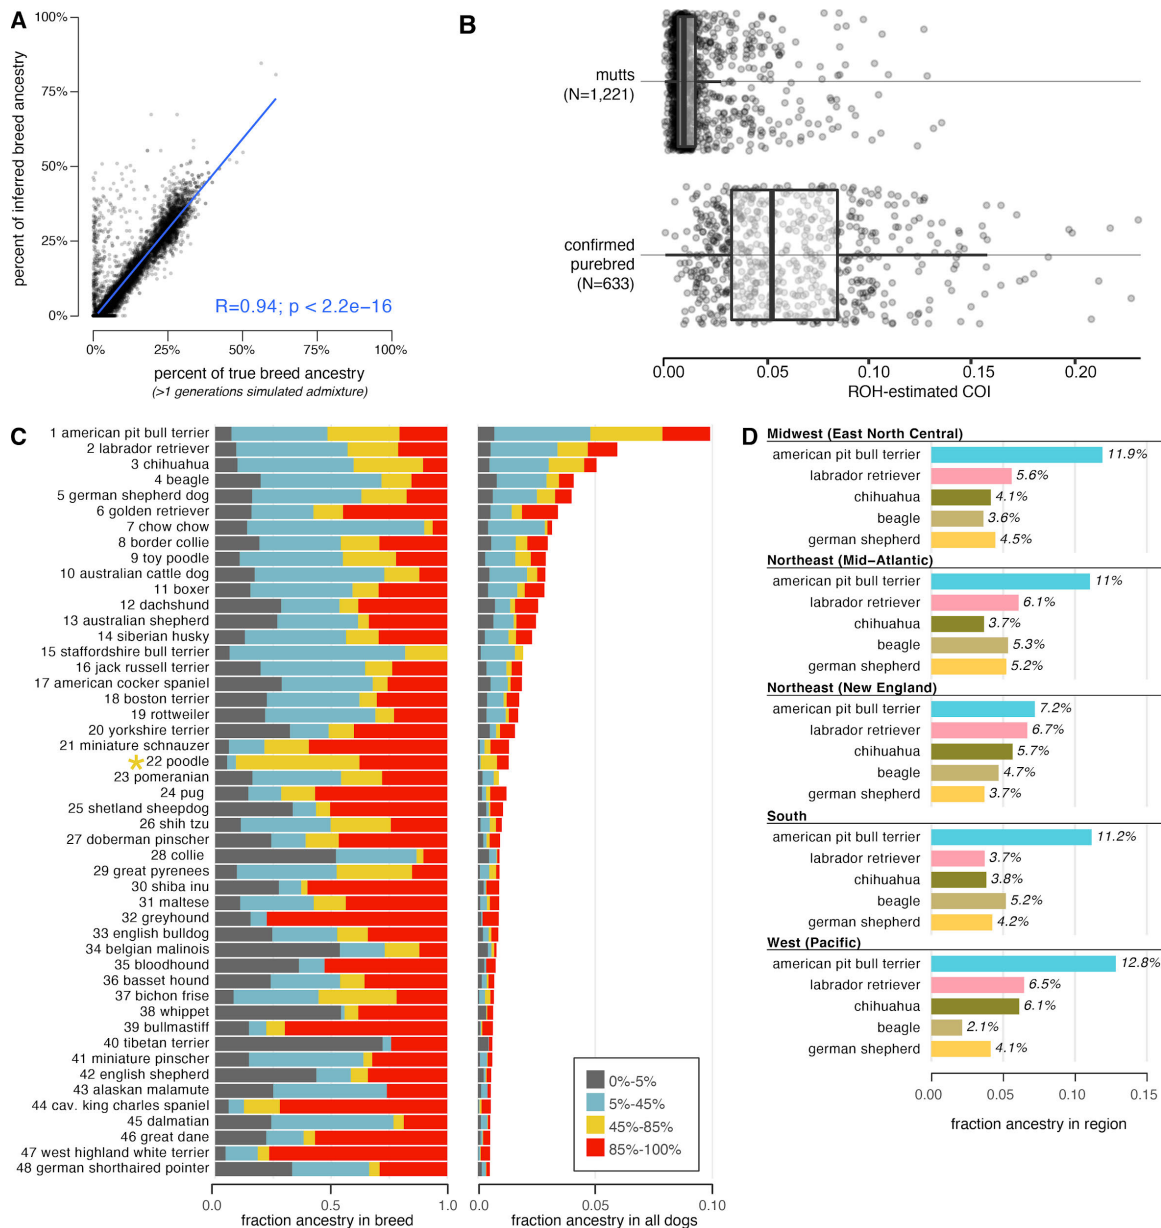

**Fig. S7. Breed ancestry in mutts in the Darwin's Ark cohort.** (A) Our breed calling pipeline accurately measures breed ancestry in simulated mixed breed dogs, with inferred ancestry strongly correlated with the known (simulated) breed ancestry. (B) Coefficients of inbreeding estimated from the total length of autosomal runs of homozygosity divided by SNP-covered total chromosome length run higher in confirmed purebred dogs than in mutts ( $p_{t\text{-test}}=1.7 \times 10^{-122}$ ;  $t=28.4$ ,  $df=776.8$ ). (C) The most common ancestry across all dogs is American pit bull terrier, followed by Labrador retriever and chihuahua. The proportion of the ancestry coming from purebred dogs vs. mutts varies by breed. An exceptionally high proportion of dogs with poodle ancestry (yellow asterisks) are 45-85% poodle, a range that includes F1 poodle crosses. (D) The proportion of ancestry by breed in the dog population varies by region of the United States, possibly reflecting differences in breed popularity in the past.

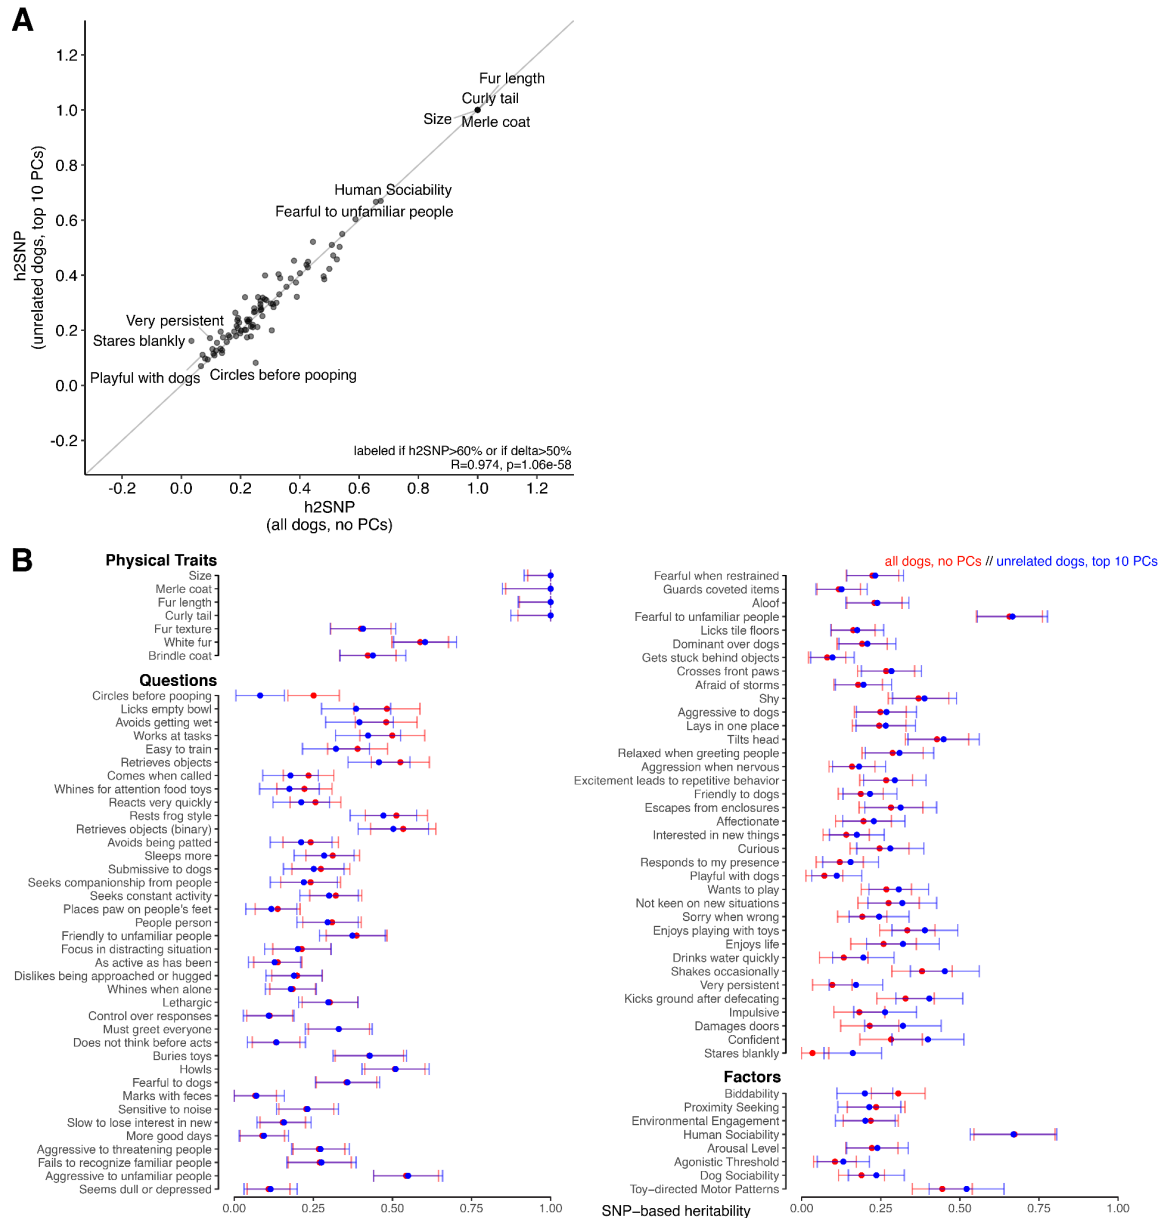

**Fig. S8. Controlling for population structure via principal component analysis does not change SNP-based heritability estimates.** We estimated heritability with standard errors using restricted maximum likelihood with LD score correction in two models: (1) all dogs with no principal component covariates (red) and (2) all dogs except 46 dogs from highly related pairs of kinship  $>0.2$  with the top 10 principal components included (blue). **(A)** Heritabilities estimated by both models were highly correlated ( $R_{\text{pearson}}=0.974$ ,  $p=1.06 \times 10^{-58}$ ). **(B)** The heritability estimates for physical traits did not differ between models, and the estimates for behavioral questions and factors rarely differed. The most dramatic shifts in heritability were observed for the question “Circles before pooping” and factor 4 (biddability).

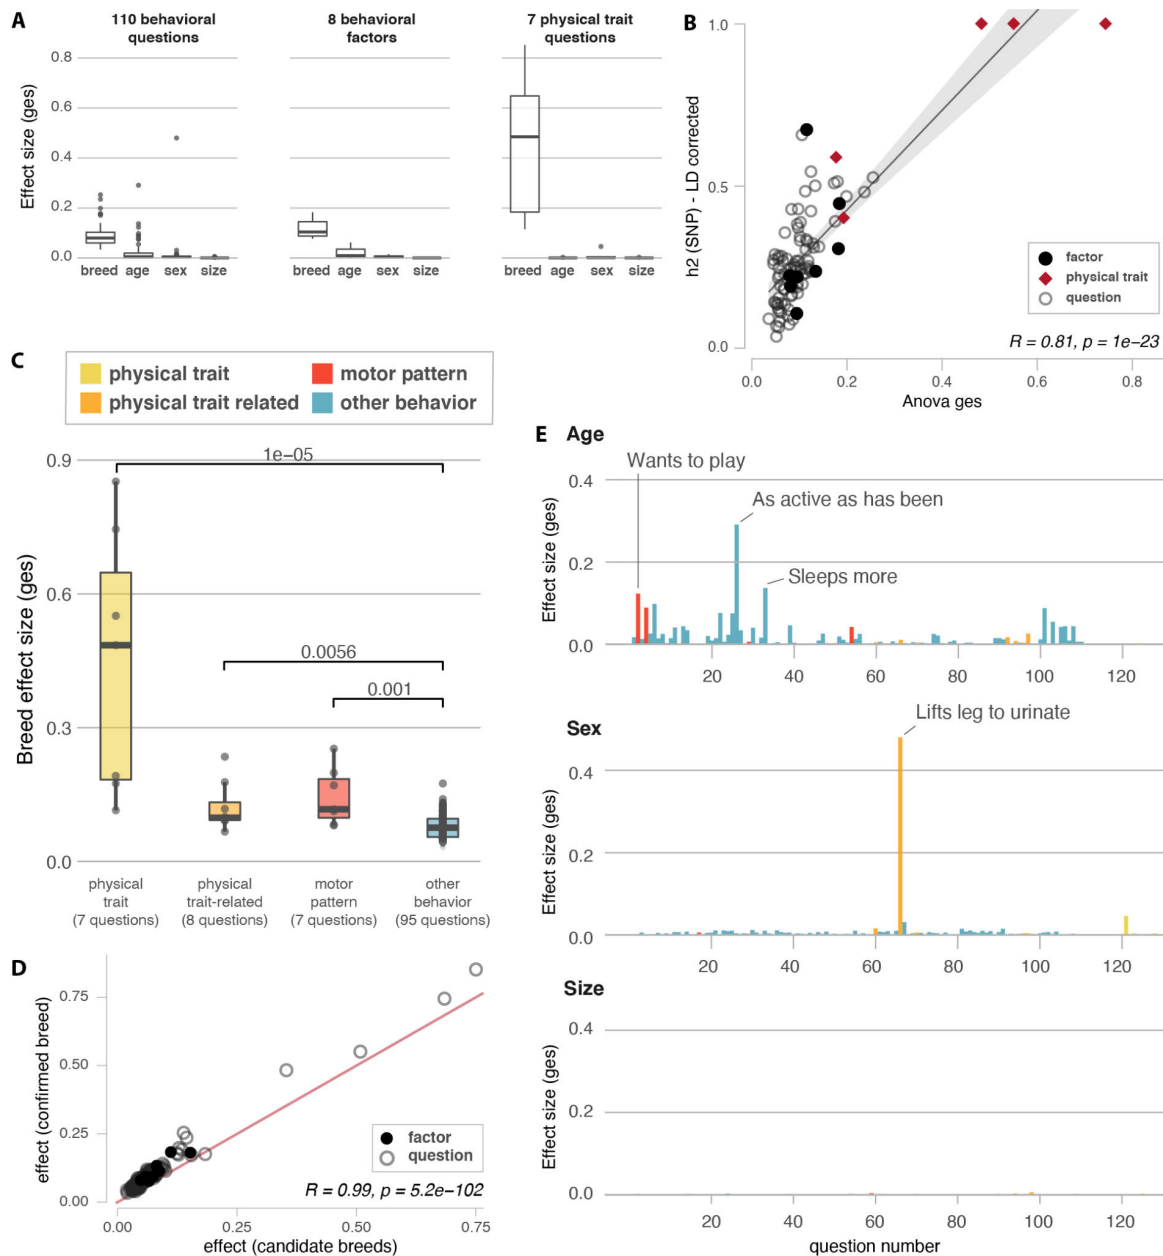

**Fig. S9. Breed explains a larger fraction of the variance in behavior phenotypes than size, sex or age.** (A) Breed has larger effect than age, sex or size, measured as generalized eta squared (ges), on both questions and factors, but the effect is still modest except for breed-defining physical traits. (B) The effect of breed is strongly correlated with the heritability of a trait in the pet dog population. (C) Breed effect sizes for physical traits, physical-trait related questions and motor patterns are significantly higher than for other behavioral questions (Wilcoxon test using alternative = "greater" with BH correction). (D) The variance explained by breed in ANOVA analysis of candidate purebred dogs (6,832 dogs in 122 breeds with  $\geq 5$  dogs/breed) is strongly correlated with results from confirmed purebred set, suggesting that the less stringent classification adequately captures the effect of breed. (E) Age has  $\text{ges} > 0.1$  (labeled peaks) for three questions, sex for one question, and size for none.

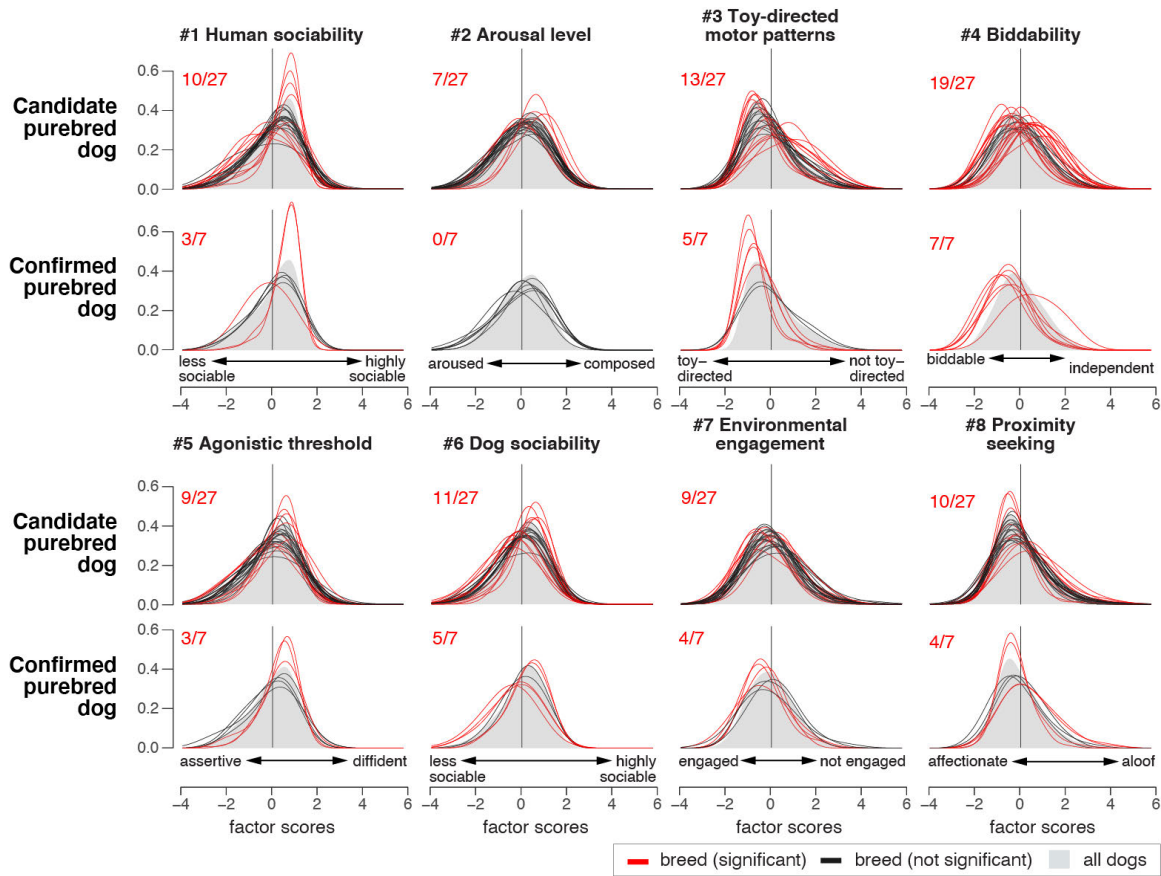

**Fig. S10. Distribution of factor scores (based on owner surveys) in breeds differ somewhat from distribution in all dogs.** For each factor, some breeds have distributions that are significantly different ( $p_{BH} < 0.05$ , red lines) from the distribution in all dogs (grey area), although most do not (black lines). Difference was measured using the Kolmogorov-Smirnov test, a nonparametric test of the equality of continuous distributions, with Benjamini-Hochberg FDR correction. Red text shows the number of breeds that are significantly different. All breeds with  $\geq 50$  dogs were included.

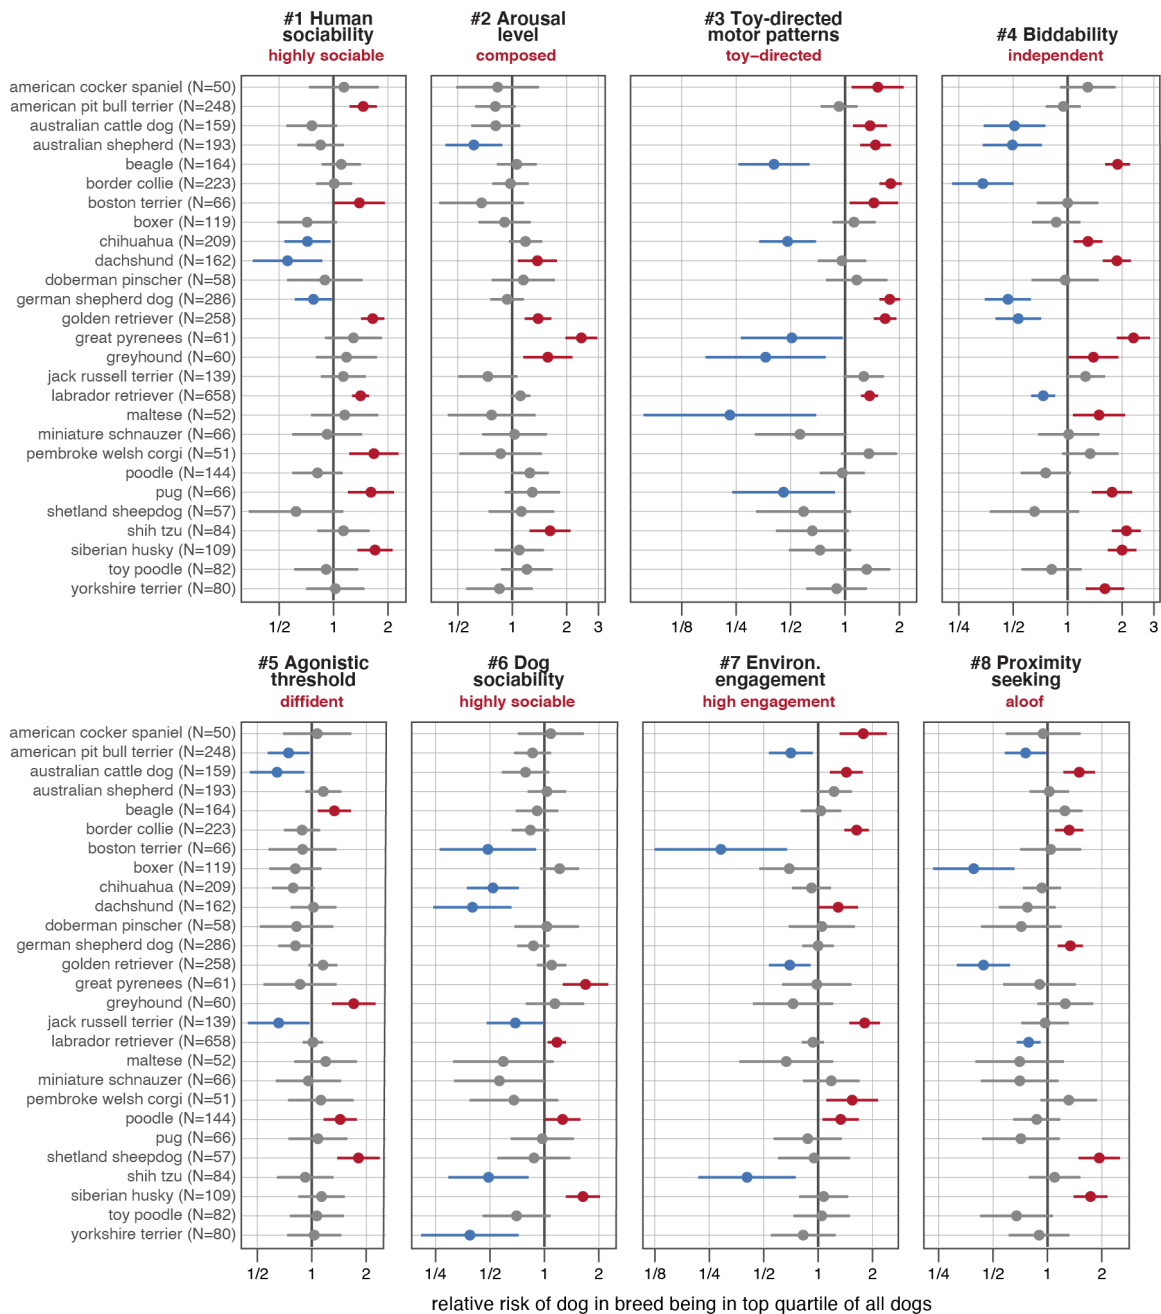

**Fig. S11. Value of breed in predicting factors scores for individual purebred dogs.** Fold difference (and 95% CI) in probability that a dog of a given breed will score in the top quartile for each factor, relative to a random dog. Red indicates fold probability significantly greater than 1; blue indicates significantly less than 1.

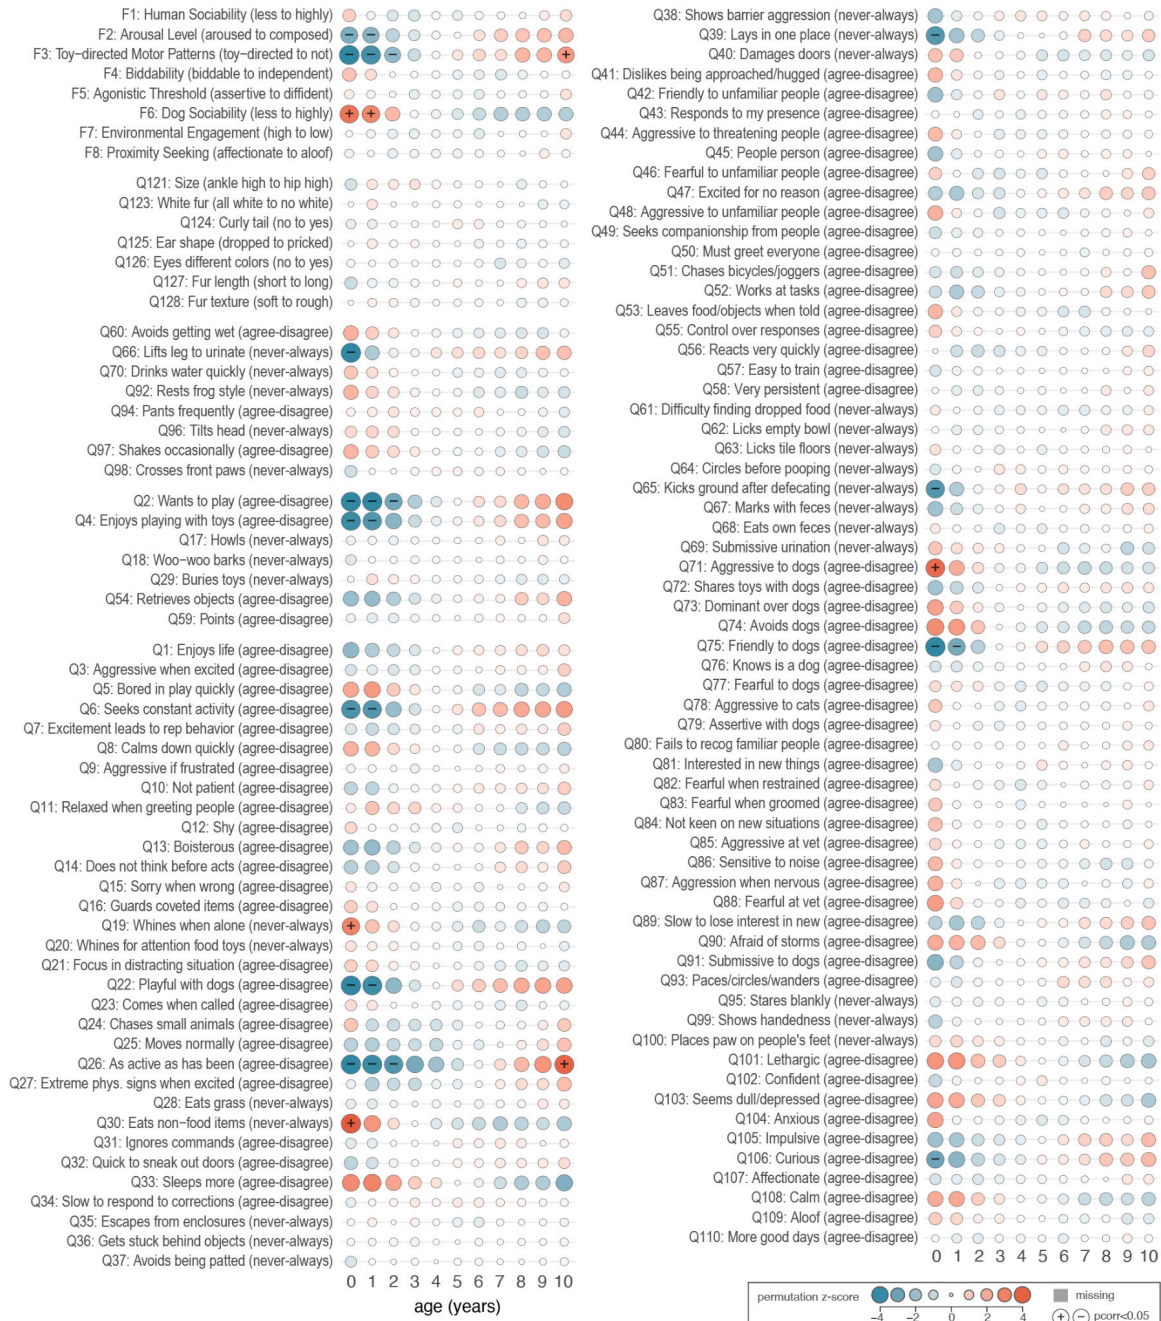

**Fig. S12. Full set of population peculiarity scores (page 1/4).** For each population tested, empirical z scores were measured over 500,000 random permutations. Circle size scales with  $\text{abs}(z)$  and color scales with  $z$ , with significant differences marked with “+” or “-”. (A) Results comparing dogs of each year of age, rounded down (such that “Y01” is dogs between 0 and 1 years of age), to randomly sampled dogs, with sample size of 100.

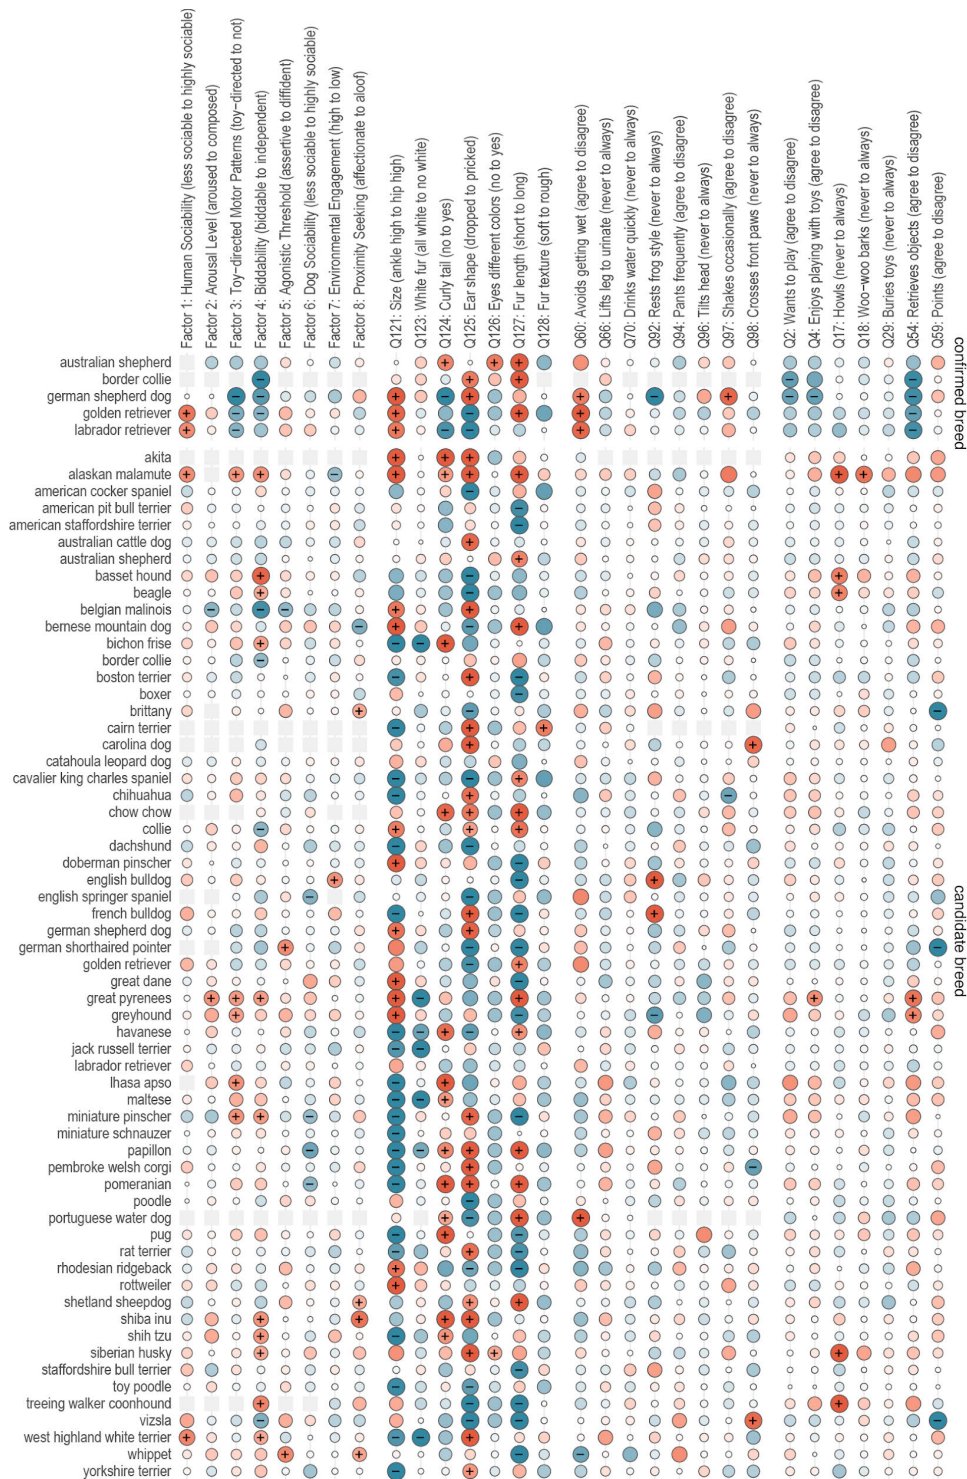

**Fig. S12. Full set of population peculiarity scores (page 2/4). (B) Results comparing dogs from each breed to randomly sampled dogs.**

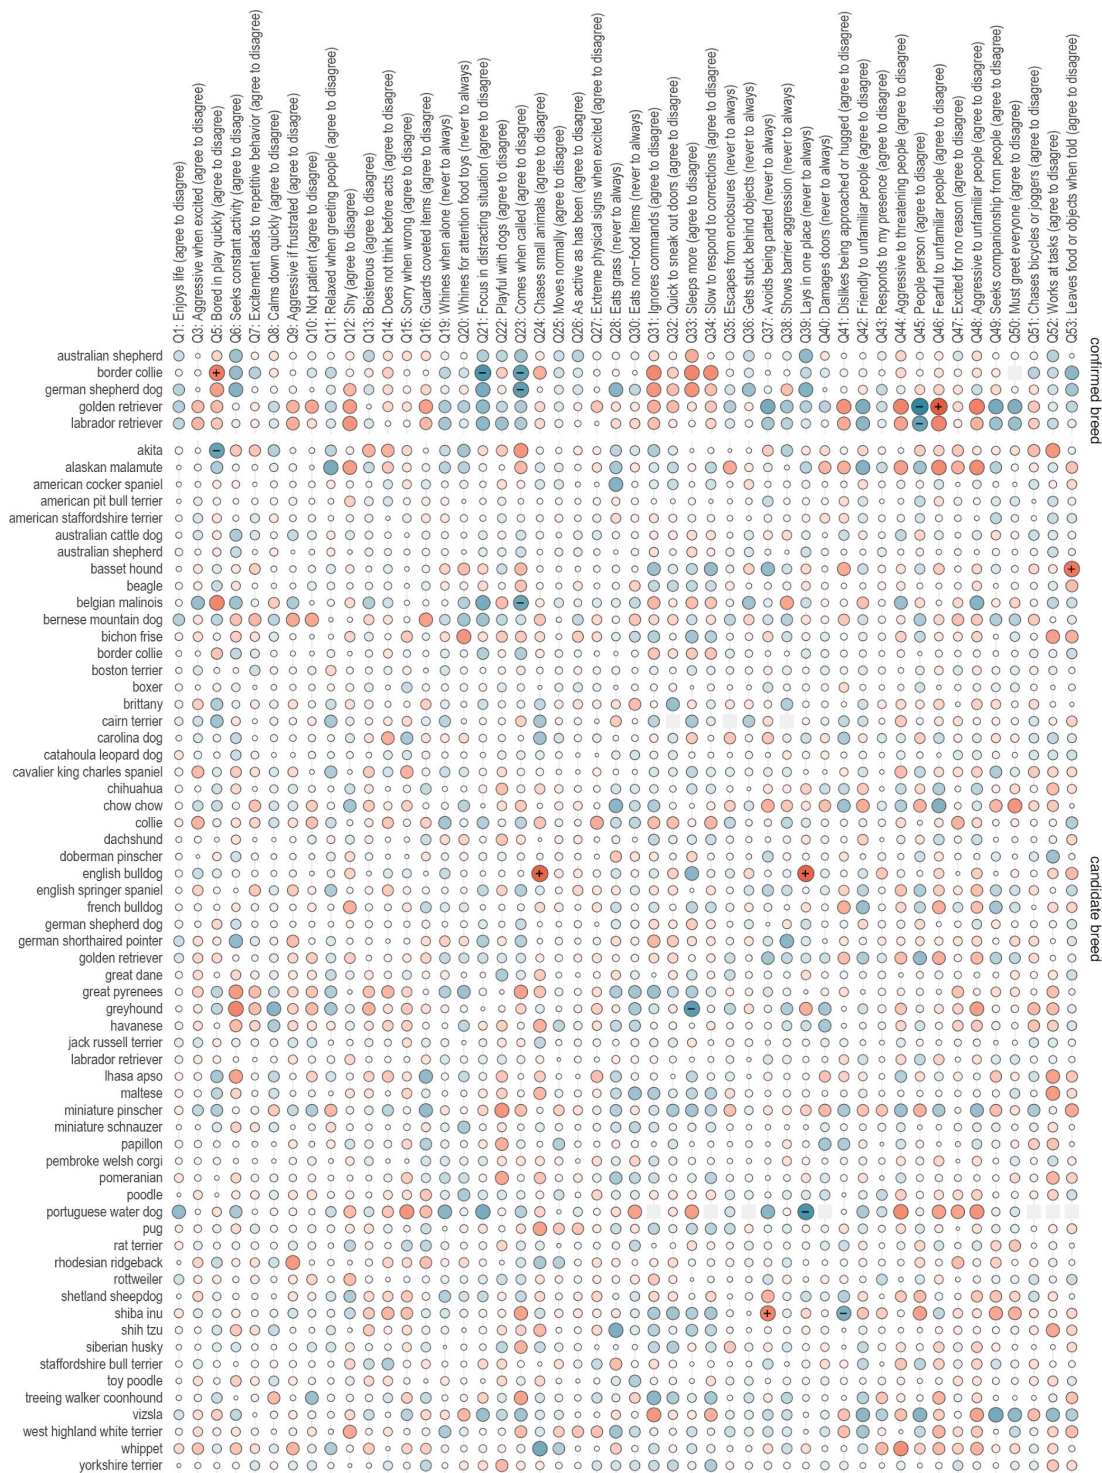

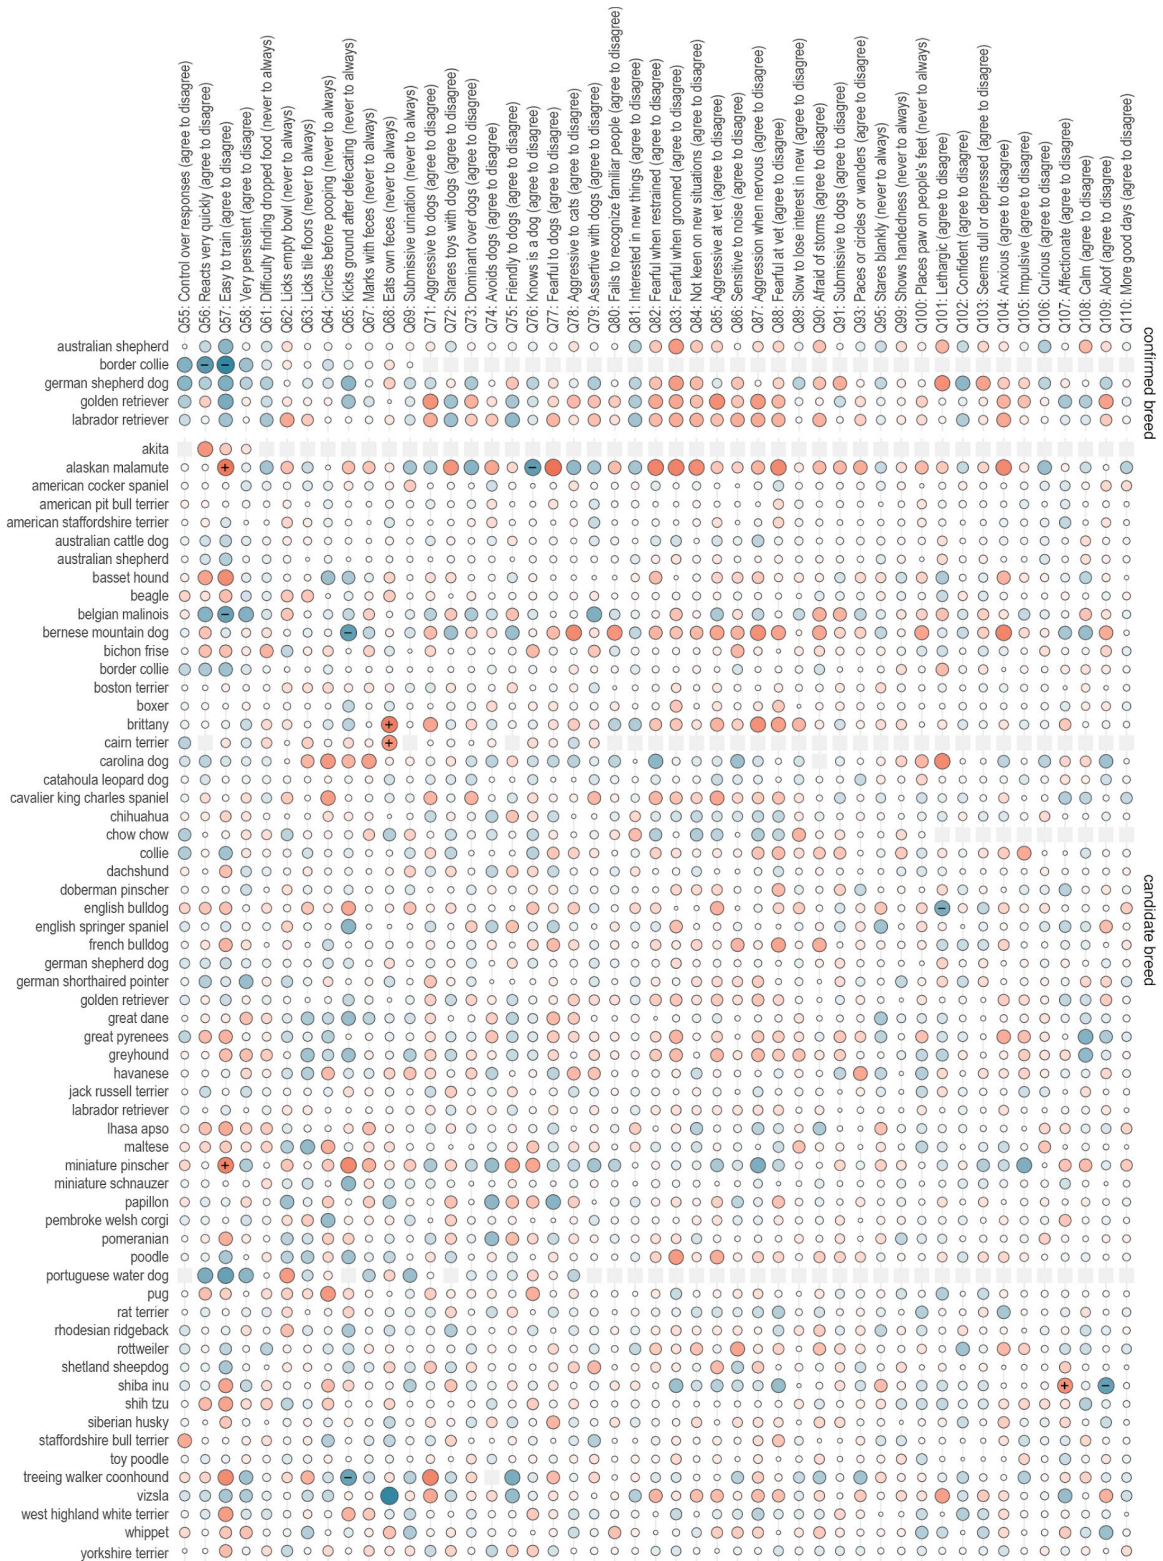

**Fig. S12. Full set of population peculiarity scores (page 4/4). (B) Results comparing dogs from each breed to randomly sampled dogs.**

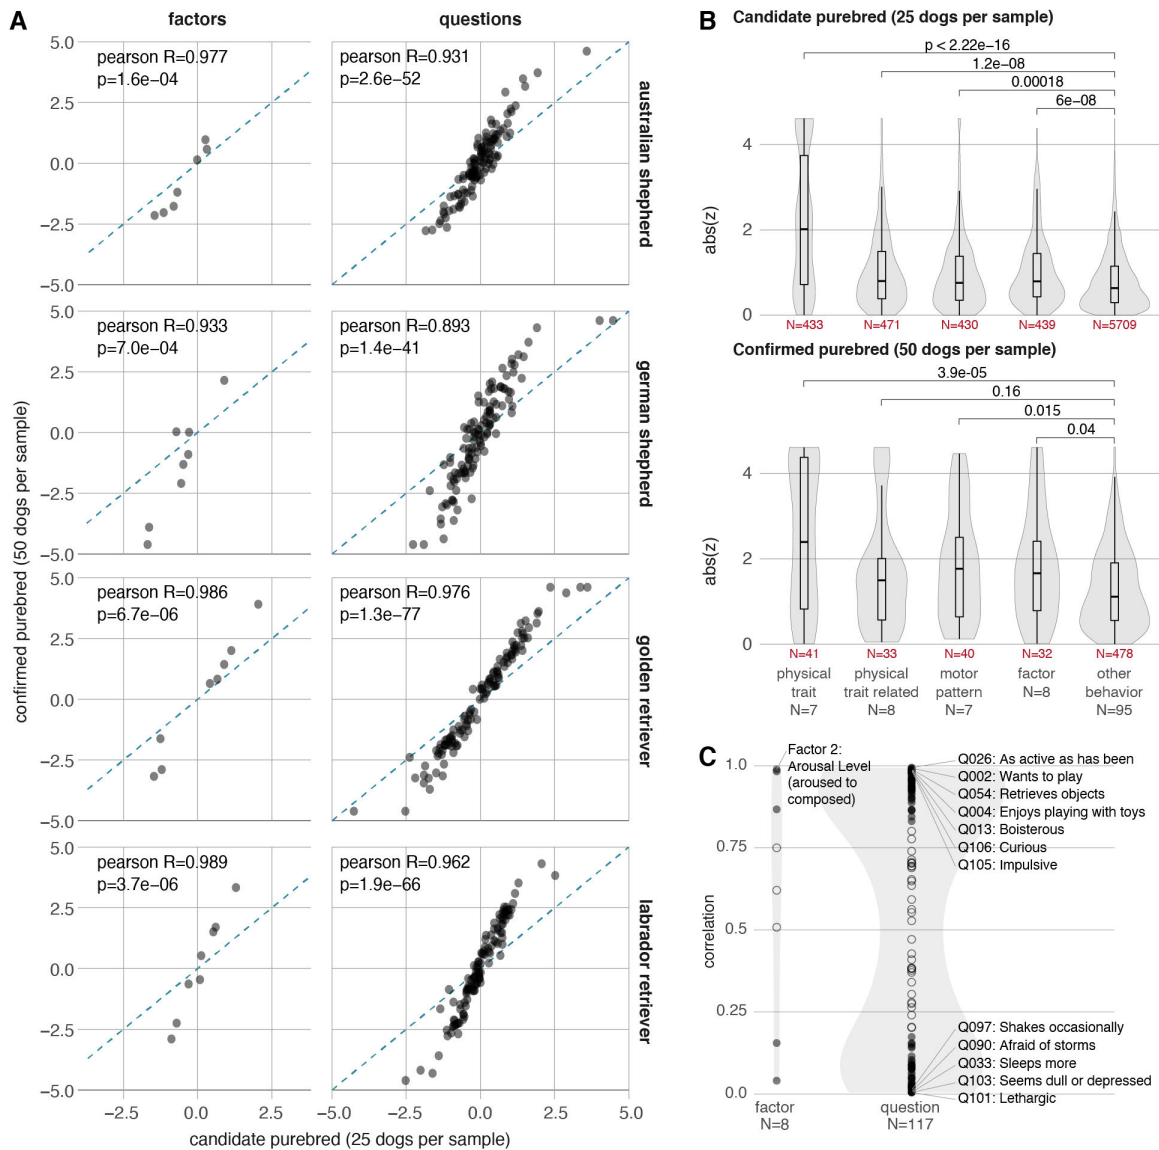

**Fig. S13. Features of Population Peculiarity Scores (PPS).** Permutation testing of breeds compared to random dogs yielded a 2-tailed z score reflecting how differentiated the breed is on each factor and question. (A) PPS z scores for candidate and confirmed purebred dogs are strongly correlated for both factors (left) and questions (right), with confirmed purebred almost always (91.4% of tests) yielding more extreme z scores (median z score change of 2.21-fold for factors and 2.15-fold for questions). Results shown for four breeds with >100 confirmed purebred dogs. (B) Comparison of absolute z scores for different question types shows breeds are most differentiated for physical traits, and that physical trait related questions, motor patterns, and factors score higher than other behavioral questions. Differences are more pronounced in the candidate purebred analysis (top), which includes up to 40 breeds per question/factor, than the confirmed purebred (bottom), with just 4-5 breeds. T-test with FDR corrected p-values (BH procedure). (C) Differentiation in dogs grouped by year of age shows scores for some questions/factors are highly correlated with age. Most correlated 10% of points are labeled.

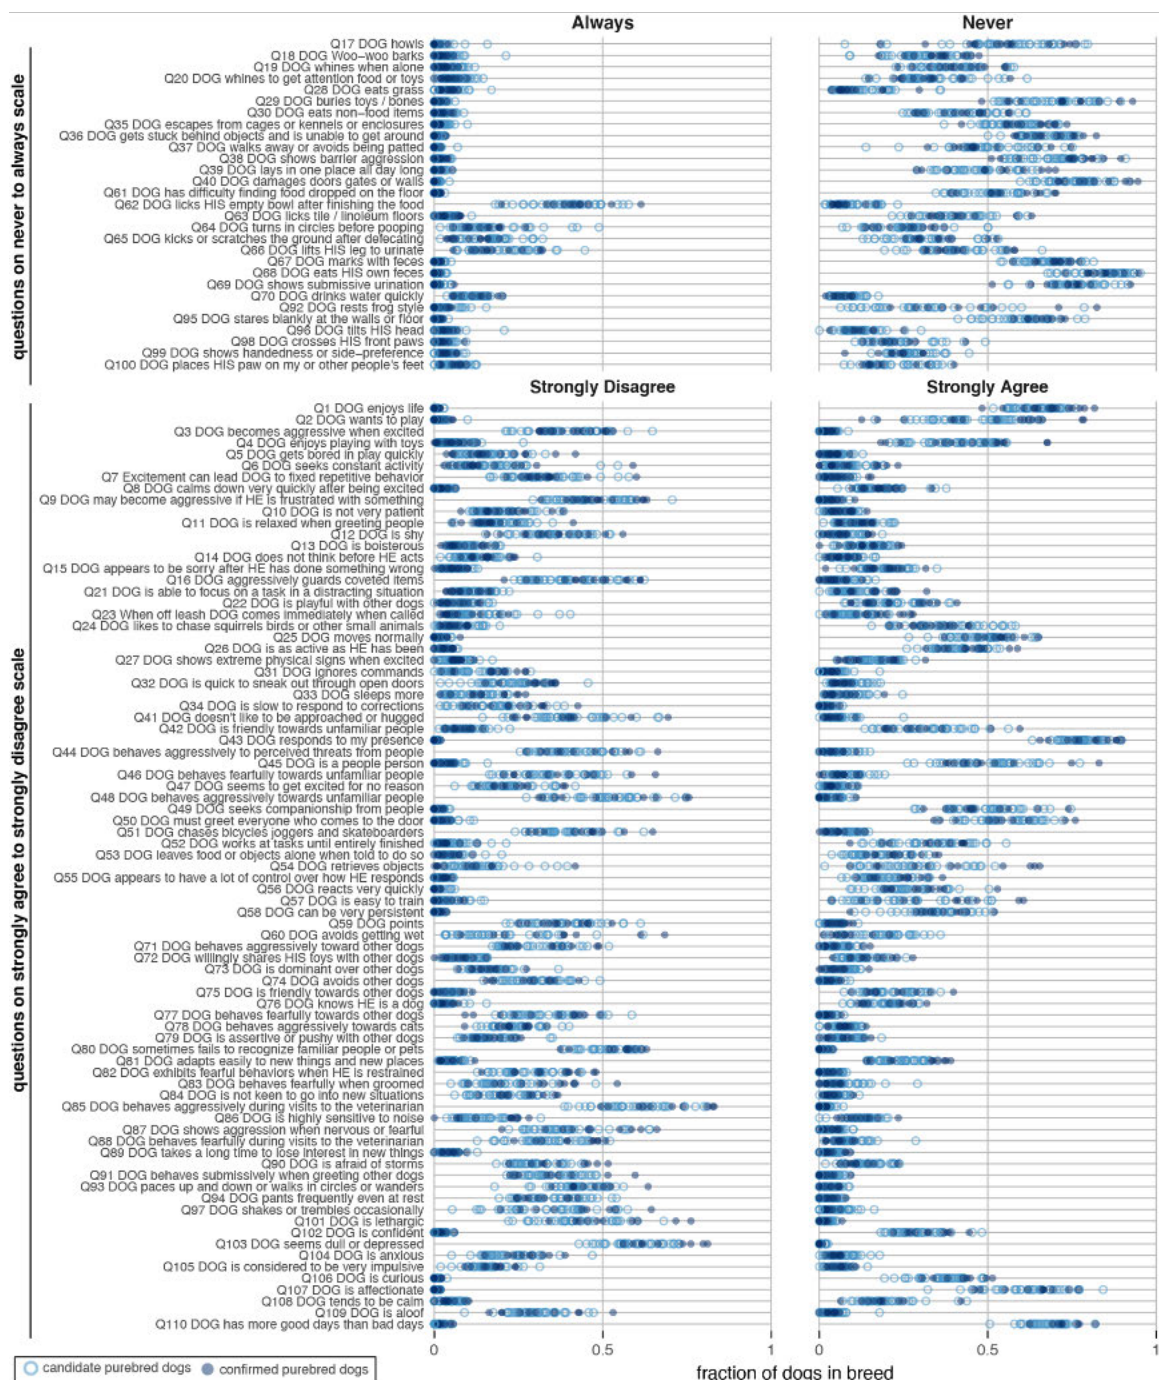

**Fig. S14. No behaviors are exclusive to a subset of breeds.** For breeds represented by  $\geq 50$  dogs (44 candidate breeds and 15 confirmed breeds), the fraction of owners choosing an answer at either end of the 5-level Likert scale (Never, Always, Strongly Agree, or Strongly Disagree) never reaches 100%.

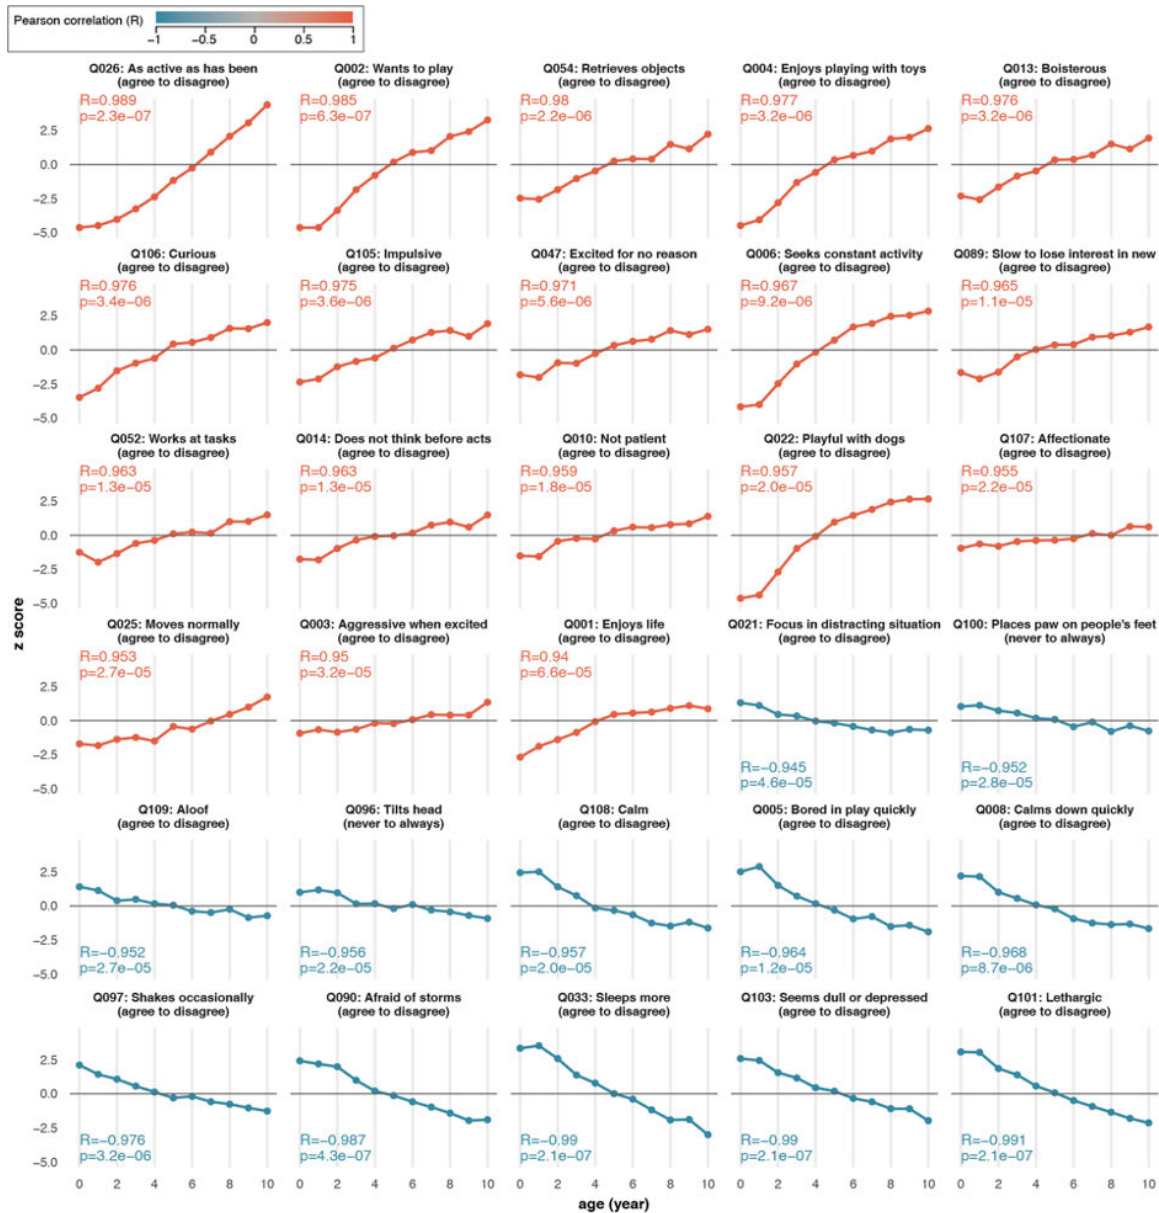

**Fig. S15. The 30 questions (representing top quartile) with responses most correlated (either negatively or positively) with year of age.** PPS z score after 500,000 permutations is on y-axis, and Pearson correlation, with FDR corrected p-values (BH procedure), is printed in the lower left or upper right of each plot. Words in parentheses show direction of score. For example, “(agree to disagree)” means low scores indicate differentiation towards “agree” and high scores indicate differentiation towards “disagree”.

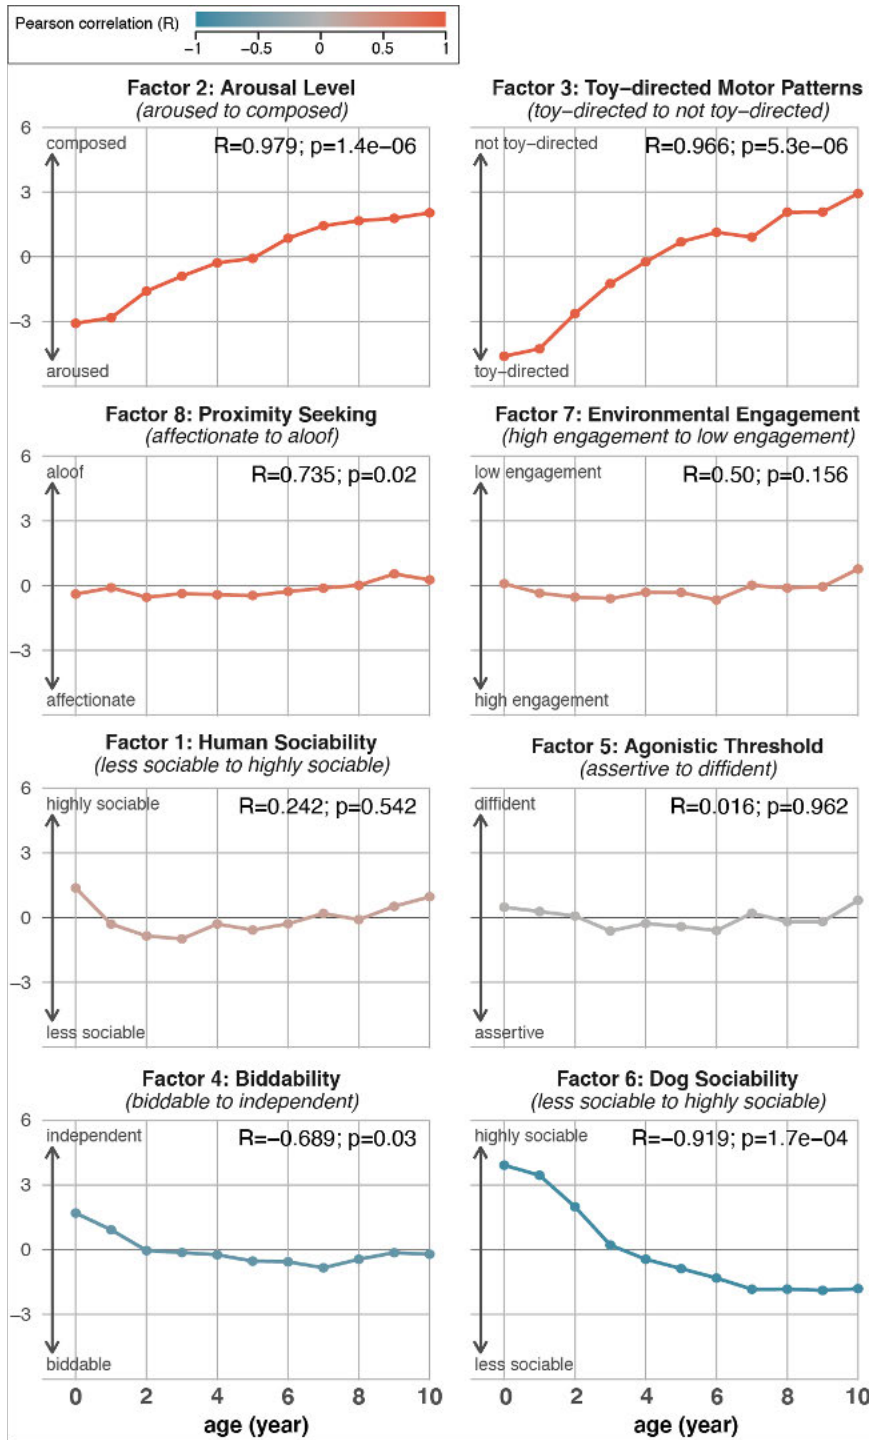

**Fig. S16. PPS correlation with year of age for all eight behavioral factors.** PPS  $z$  score after 500,000 permutations is on y-axis, and Pearson correlation, with FDR corrected  $p$ -values (BH procedure), is printed in the upper left of each plot. The direction of the differentiation is printed next to the y axis with a two-headed arrow. Six factors (all except factor 5 and factor 4) are correlated with age.

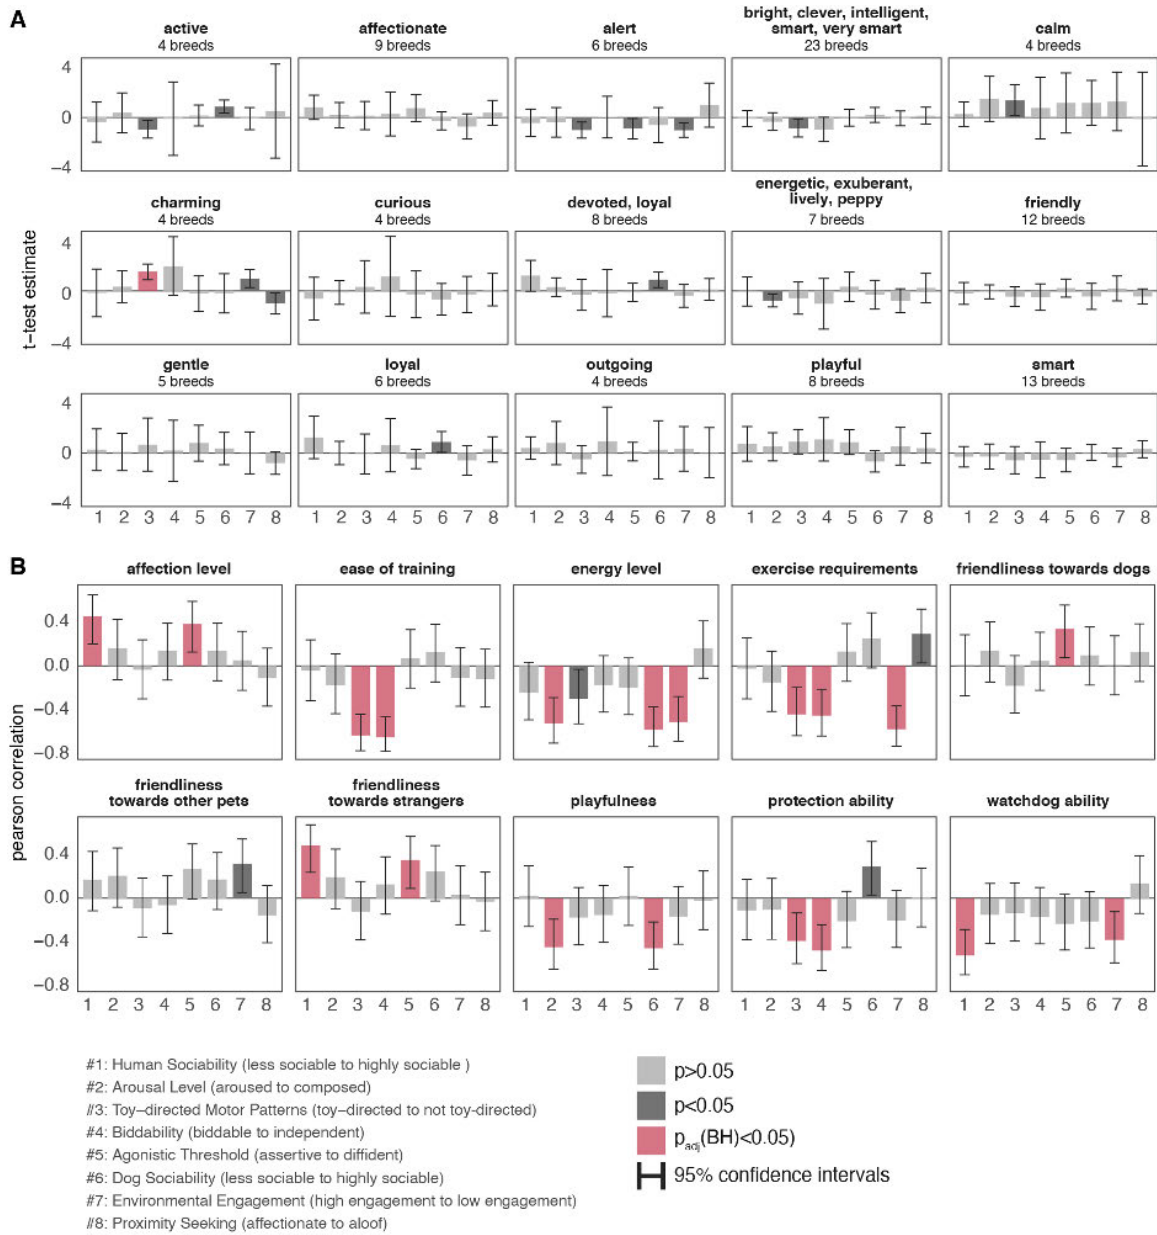

**Fig. S17. Breed stereotypes versus breed peculiarity scores.** (A) AKC's three descriptive words. Analysis of both single words and words grouped by shared meaning (all words and word groups describing  $\geq 4$  breeds included) using t-test estimates small difference in means for most words. Error bars show 95% confidence intervals around the t-test estimates. (B) Pearson correlation between behavior scores from "Encyclopedia of Dog Breeds" (19) and breed PPS.

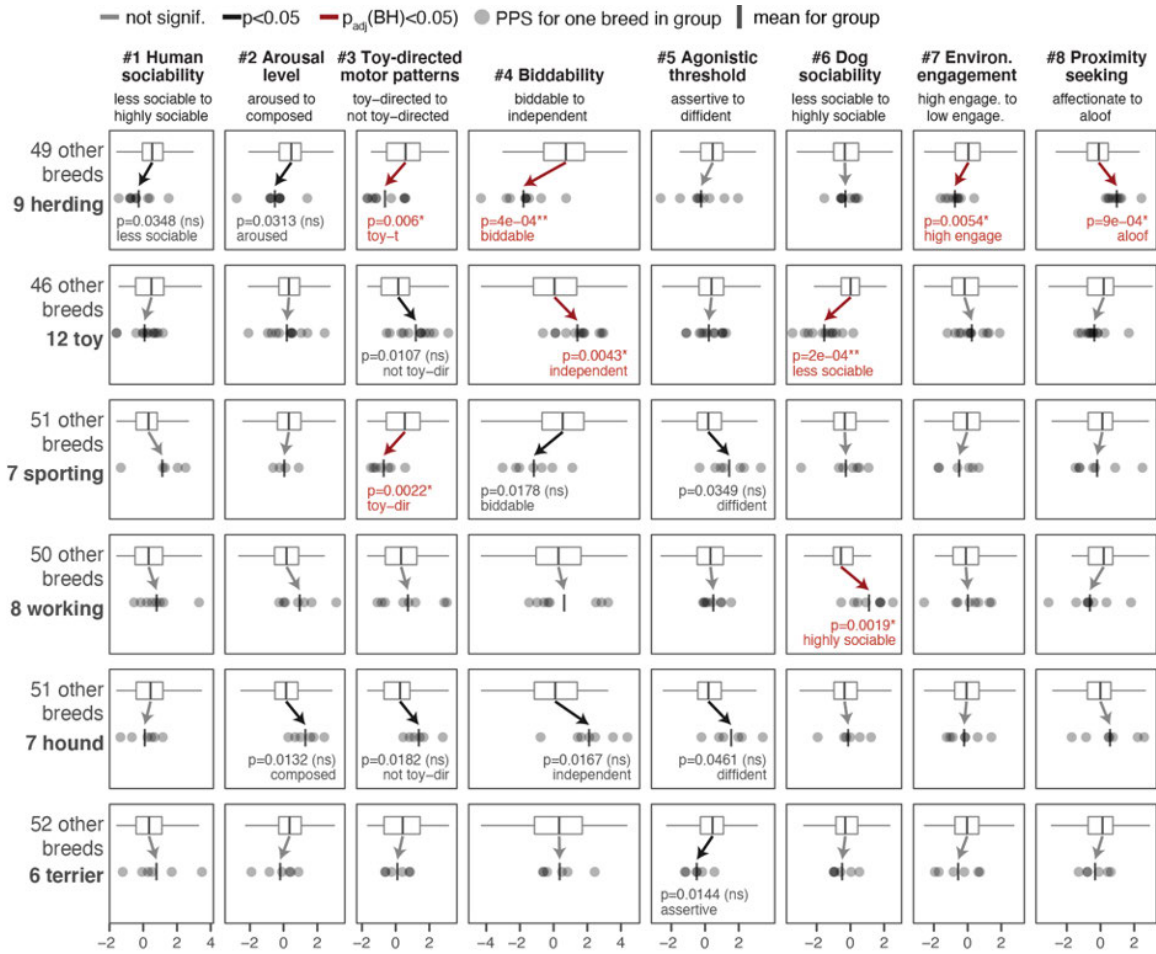

herding: australian cattle dog, australian shepherd, belgian malinois, border collie, catahoula leopard dog, collie, german shepherd dog, pembroke welsh corgi, shetland sheepdog

hound: basset hound, beagle, dachshund, greyhound, rhodesian ridgeback, treeing walker coonhound, whippet

sporting: american cocker spaniel, brittany, english springer spaniel, german shorthaired pointer, golden retriever, labrador retriever, vizsla

terrier: american staffordshire terrier, jack russell terrier, miniature schnauzer, rat terrier, staffordshire bull terrier, west highland white terrier

toy: bichon frise, cavalier king charles spaniel, chihuahua, havanese, maltese, miniature pinscher, papillon, pomeranian, pug, shih tzu, toy poodle, yorkshire terrier

working: alaskan malamute, bernese mountain dog, boxer, doberman pinscher, great dane, great pyrenees, rottweiler, siberian husky

**Fig. S18. Historic working role versus breed peculiarity scores.** This plot visualizes the difference in mean breed PPS score on each behavioral factor between breeds assigned a particular historic working role (grey filled circles) and other breeds (box plot). The arrow highlights the difference in the mean PPS score between breeds with a particular historic working role and other breeds, and is red when the shift is significant. Vertical lines are the mean for group, box encloses 25-75% quartiles (Q25-Q75), and the horizontal line extends from 1.5 interquartile range (IQR) below Q25 to 1.5 IQR above Q75 + 1.5 IQR. Darker arrows are those reaching nominal significance ( $p < 0.05$ ). Red arrows are those significant after FDR correction (BH procedure). “(ns)” are not significant after FDR correction.

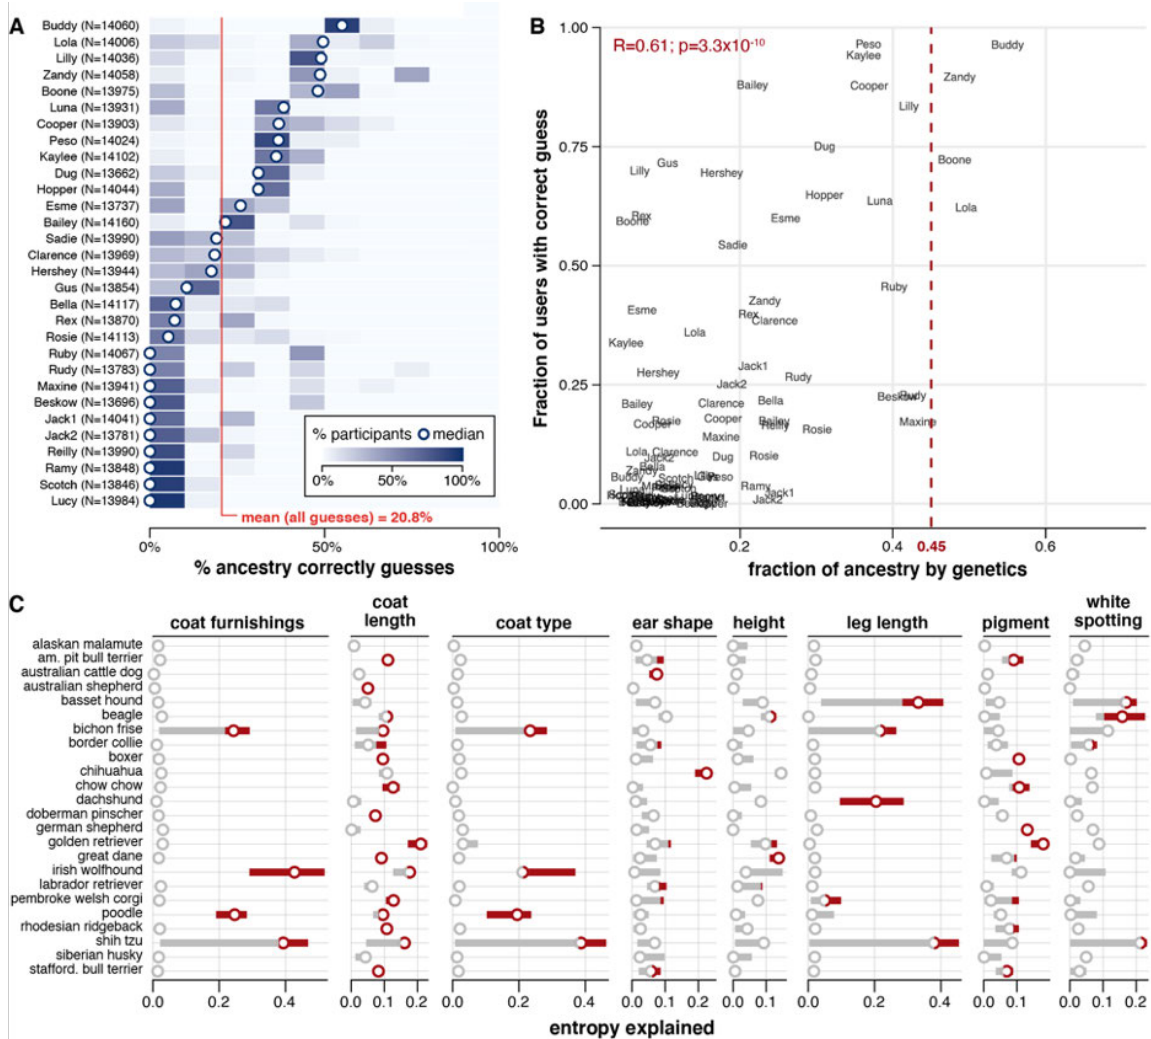

**Fig. S19. Performance of Mendel's Mutts survey participants.** (A) On average, participants correctly guessed breeds comprising a total of 20.8% of the breed ancestry in the mutts. (B) Breeds comprising a higher proportion of a mutt's ancestry are easier to guess, with all breeds > 45% guessed correctly by more than half of participants. Red text shows Pearson correlation. (C) Entropy decision stump analysis assessing what impact of presence or absence of an individual specific trait in a mutt has on probability that users would guess it to have ancestry from a given breed. Point indicates impact calculated for all 30 MuttMix mutts; bars span the range of values calculated when analysis was repeated iteratively, excluding each of the mutts in turn. Values in red indicate that a given trait significantly impacts the probability of users guessing ancestry from a given breed.

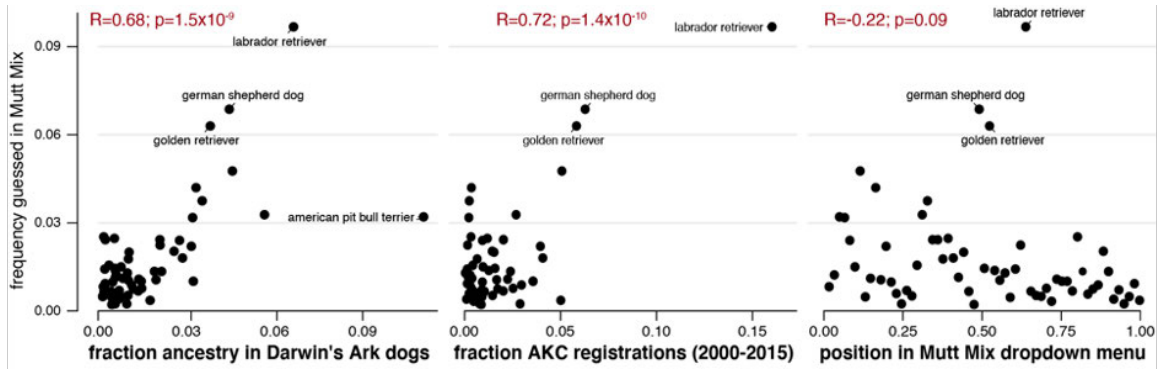

**Fig. S20. MuttMix survey participants guessed popular breeds more often.** The rate at which MuttMix users guessed a given breed ancestry is strongly correlated to the popularity of that breed, whether measured by fraction ancestry in Darwin's Ark (left) or by fraction AKC registrations (middle), and there is no significant correlation to the position of a given breed in the dropdown menu used by participants to guess breeds. Red text shows Pearson correlation.

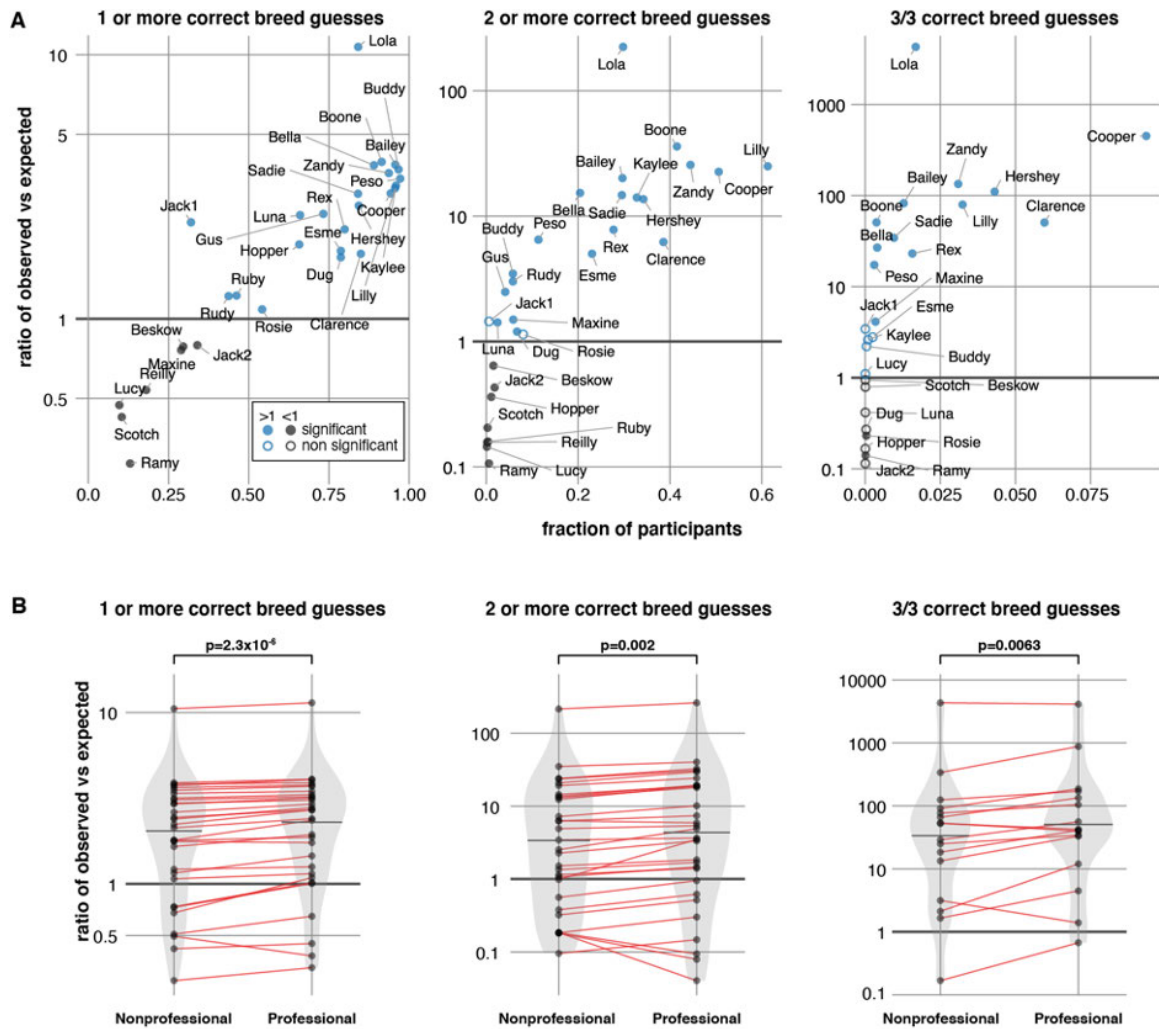

**Fig. S21. When guessing breed ancestry in mutts, people are more accurate than random chance, but still often wrong. (A)** Dogs with ancestry from more popular breeds tend to be guessed more accurately. Measuring the observed to expected ratio controls for this, and shows that people tend to be better than random chance (blue points; black is worse than random) at making 1+, 2+ and 3 correct guesses for most mutts (77%, 73% and 69% of mutts respectively), but their accuracy is still low, particularly when guessing more than one breed. Some dogs, like Cooper and Lilly, are more easily guessed than others, like Scotch. Significance was calculated using a chi-squared test to compare observed to expected. **(B)** Self-described dog professionals are slightly but significantly better than non-professionals, with higher observed/expected ratio for 1+, 2+ and 3 guesses for 93%, 87% and 75% of dogs respectively. Significance measured using paired two-sample Wilcoxon test. Horizontal black line is median, and black points are individual dogs. Red lines connect the points for the same dog. Statistical tests done using R package *stats* version 4.1.1 in R version 4.1.1.

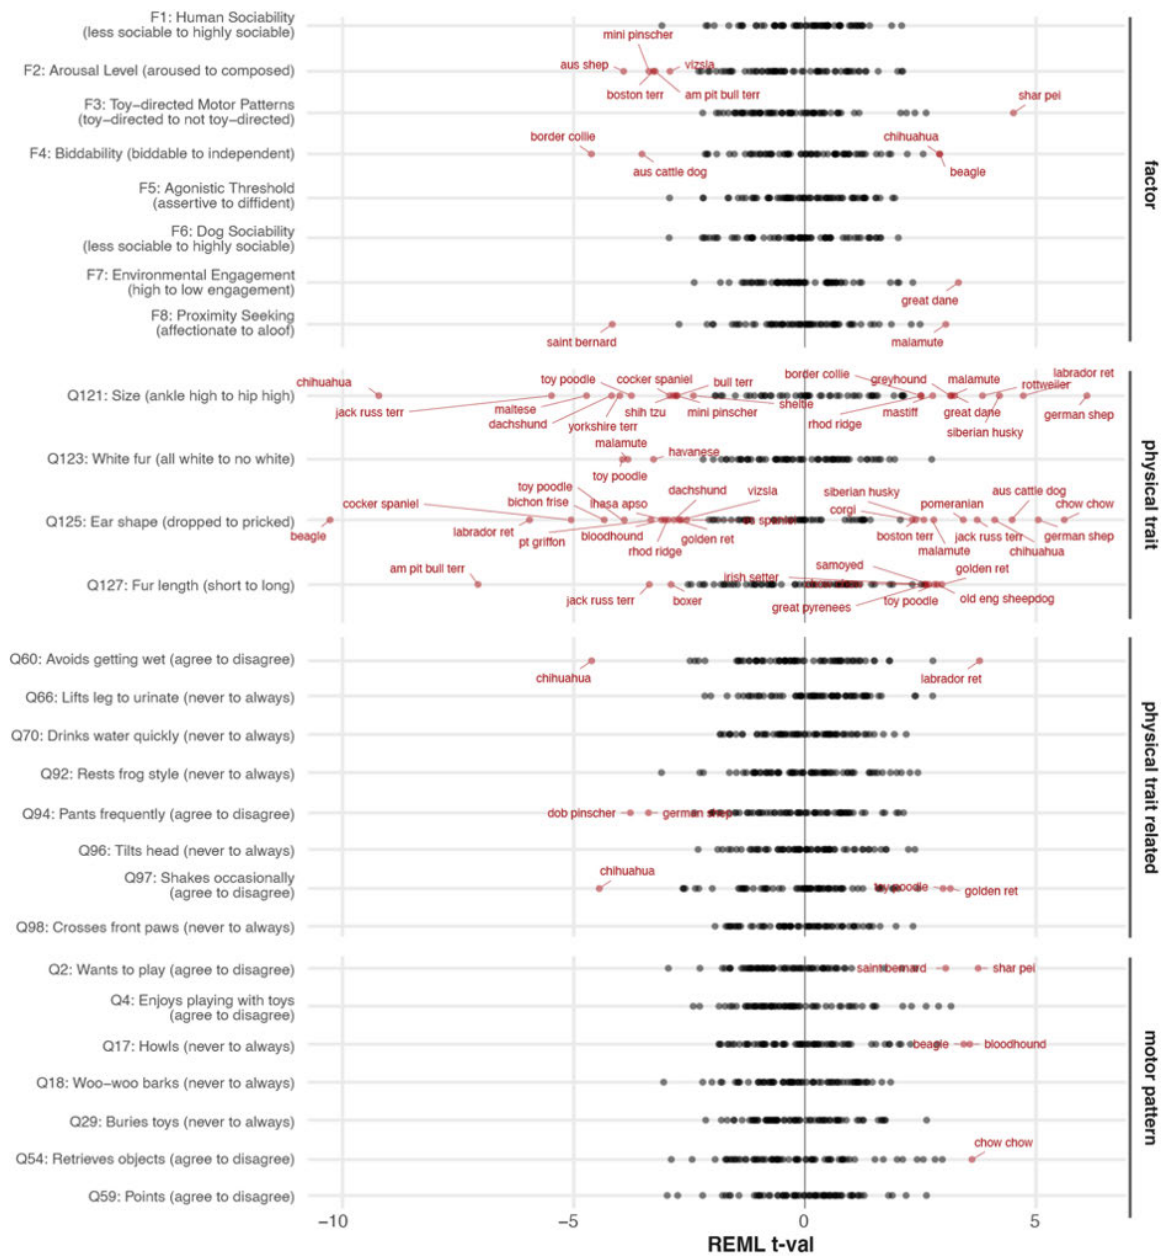

**Fig. S22. Effect of breed ancestry in mutts.** Results shown for all factors, physical traits, physical trait related behaviors, and motor patterns. Red dots (with labels) are statistically significant after FDR correction (BH procedure).

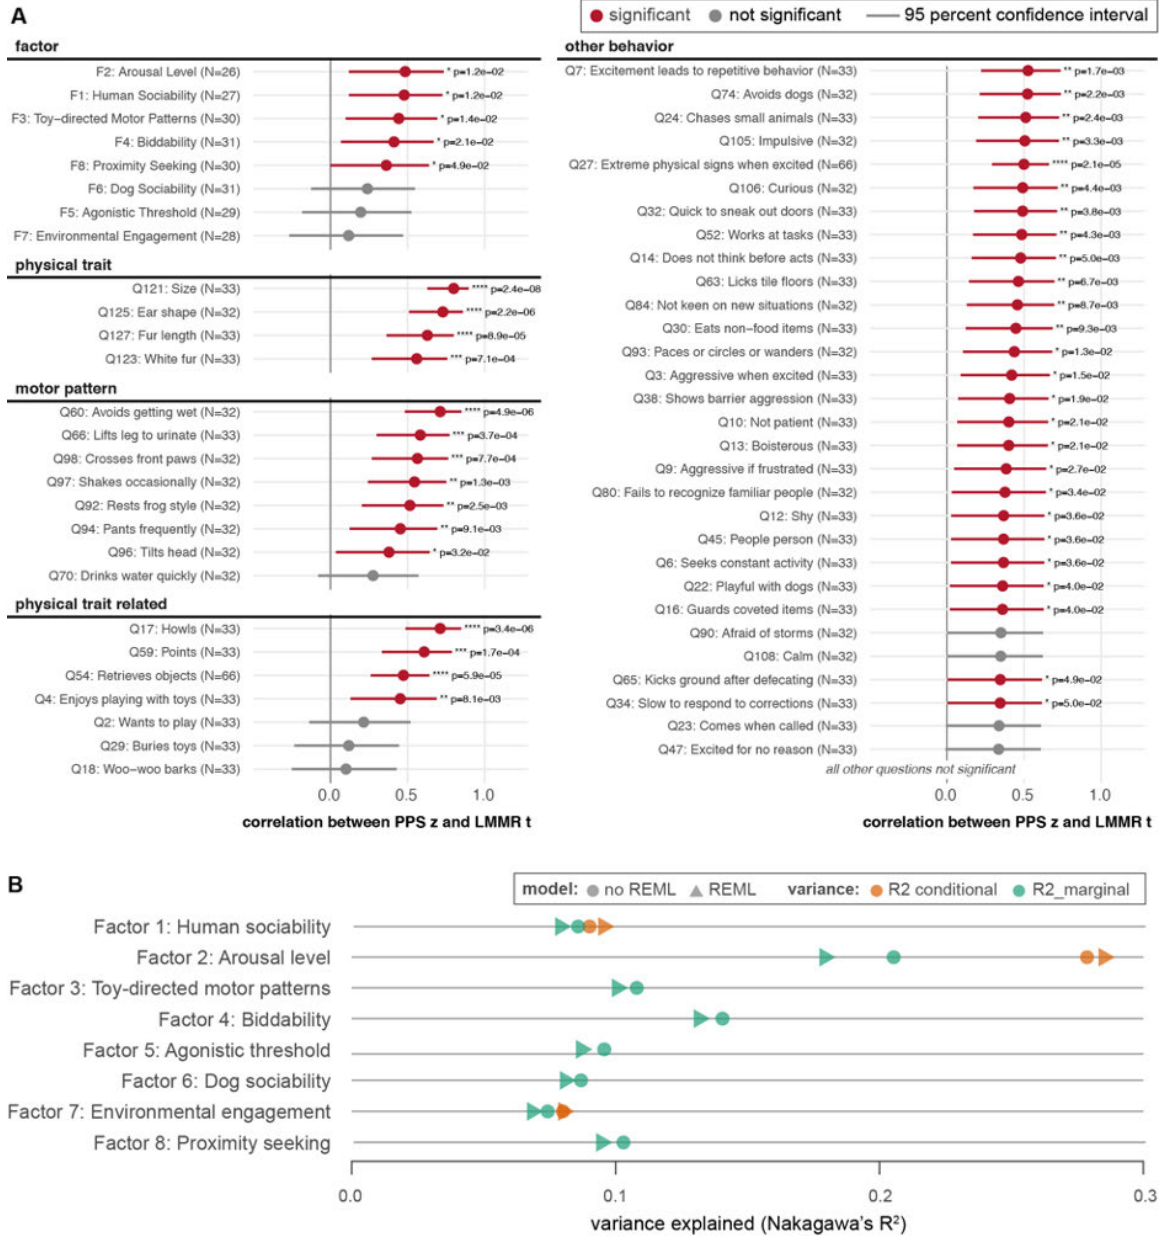

**Fig. S23. Effects of breed ancestry in perspective.** (A) Pearson correlation between effects of breed ancestry in mutts estimated by the LMER models and breed PPS in confirmed purebred dogs. Positive correlations indicate LMER is concordant with PPS. (B) Proportion of variance in factor score explained by the fixed effects of breed ancestry (the marginal  $R^2$ ), as well as variance explained by the added random effects of age group (2 years and under, adult dogs, and dogs 12 years and older) and genetic kinship (the conditional  $R^2$ ) in models not reaching singularity (tolerance =  $1 \times 10^{-5}$ ).

Comparison of survey responses from owners of purebred dogs (PPS)  
and the effect of breed in mutts (LMER)

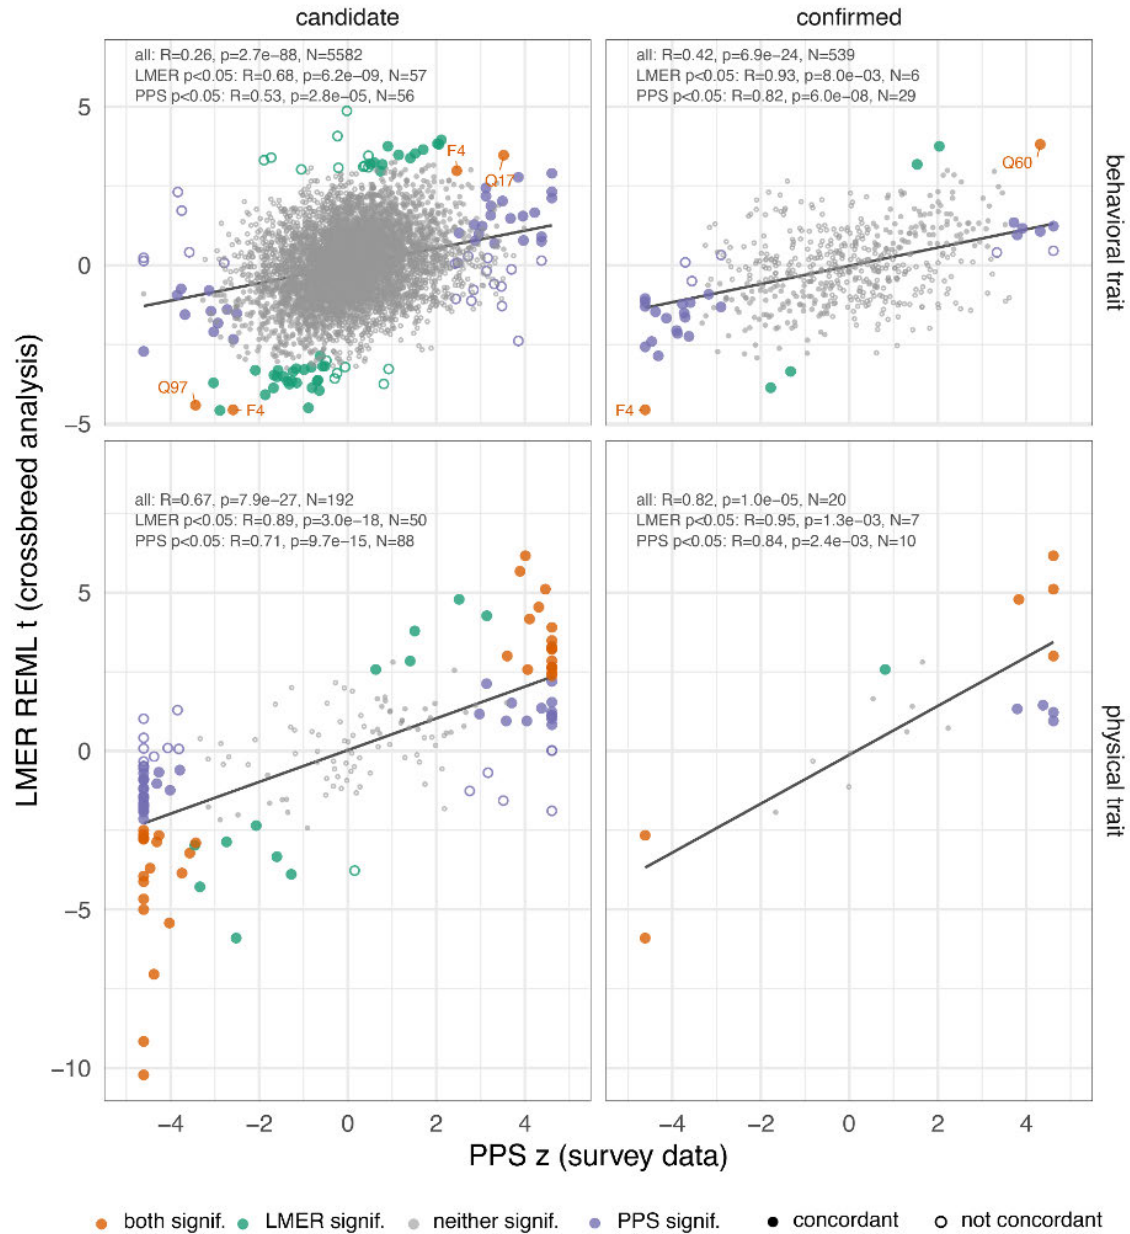

**Fig. S24. Overview of the breed effects from the ascertained ancestry of mutts (LMER analysis) versus breed effects in owner surveys of reportedly purebred dogs (PPS analysis).** Each point is a breed-trait pair. These points are solid if the directionality of the breed effect is the same in both mixed-breed and purebred dogs. Points are colored if the pair are both significant (orange), significant for breed ancestry effects (green), or significant for reported purebreds only (purple).

**A** When DOG is standing next to someone of average height, how high are HIS shoulders?

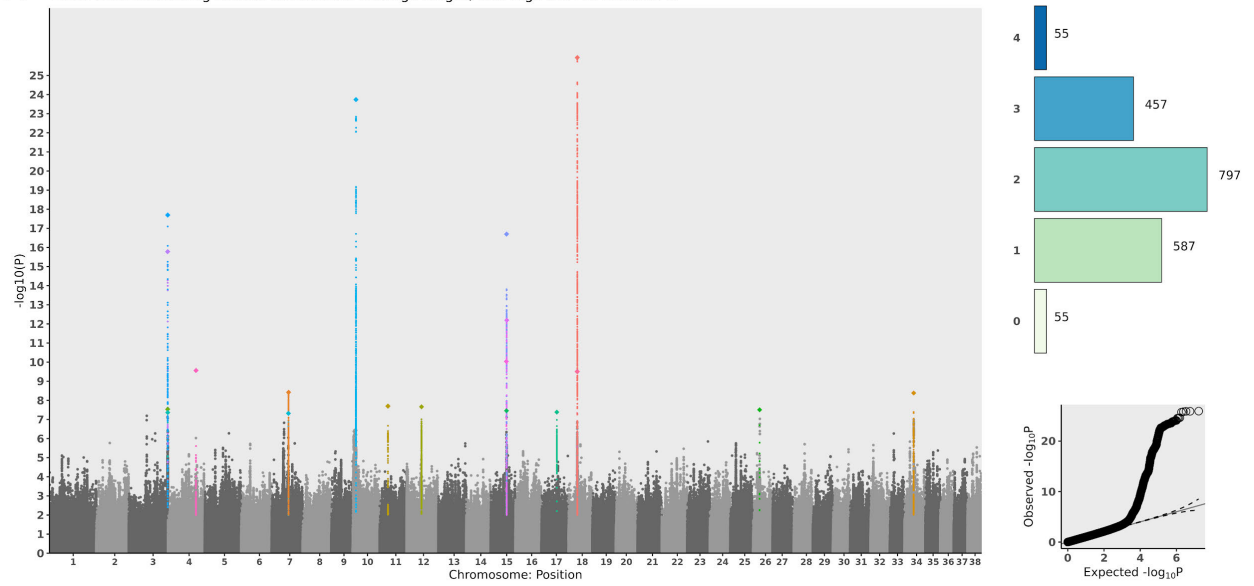

**B** When DOG is standing next to someone of average height, how high are HIS shoulders? (cases: hip high or higher, exclude: ankle-high or shorter)

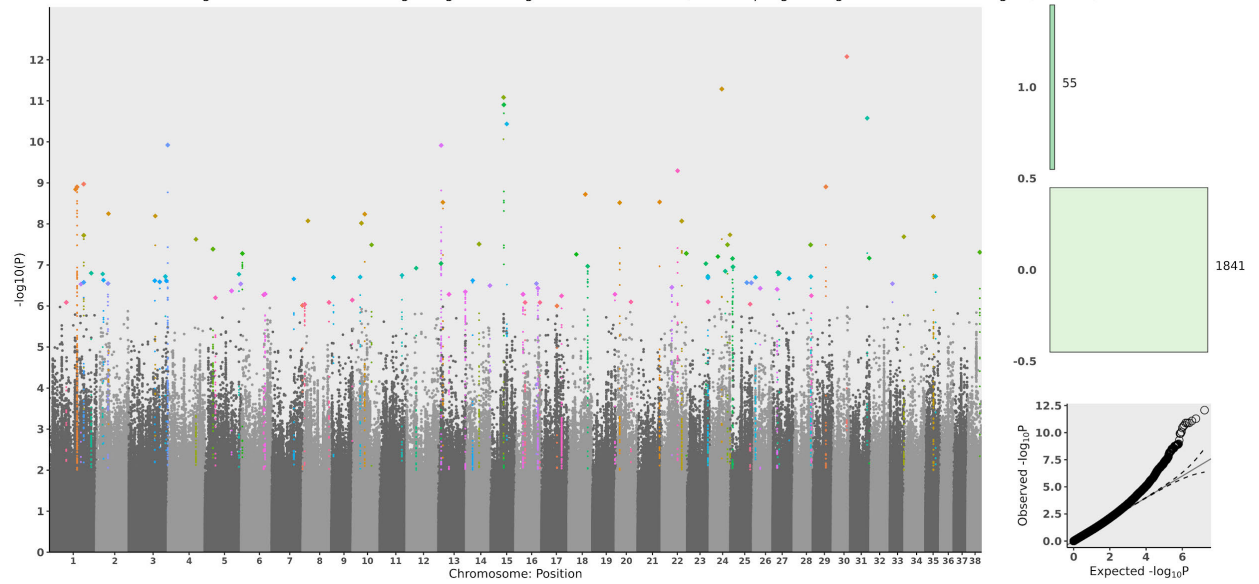

**C** When DOG is standing next to someone of average height, how high are HIS shoulders? (cases: ankle high or shorter, exclude: hip-high or taller)

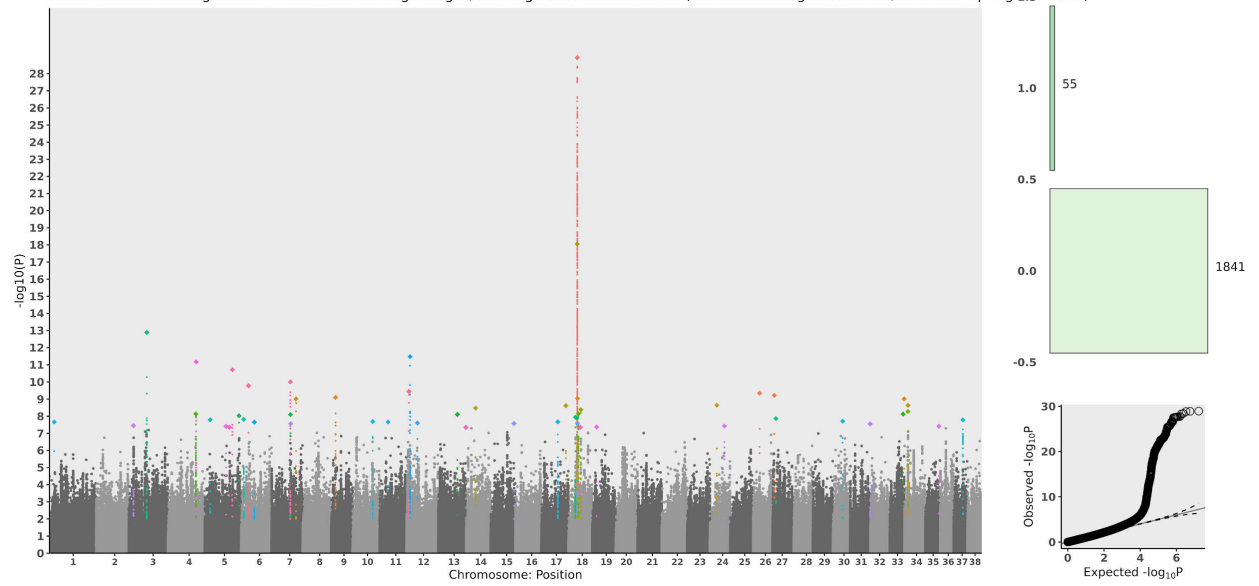

**D** How much white fur does DOG have? Select the image with the closest amount of white.

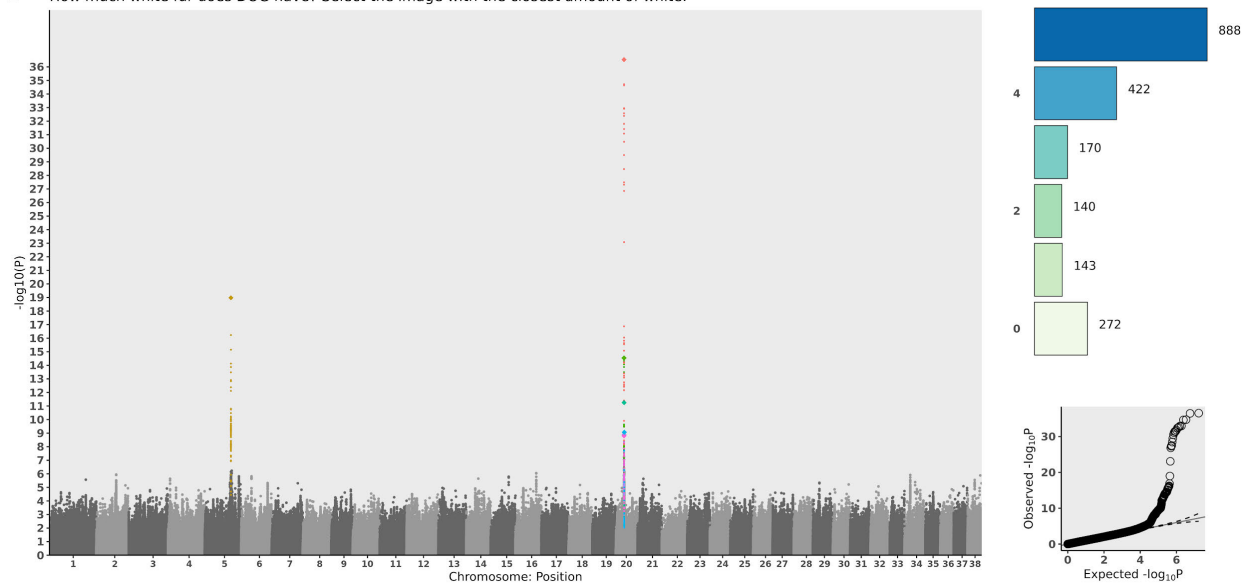

**E** How long is DOG's fur on HIS back and sides? Measure it against your finger.

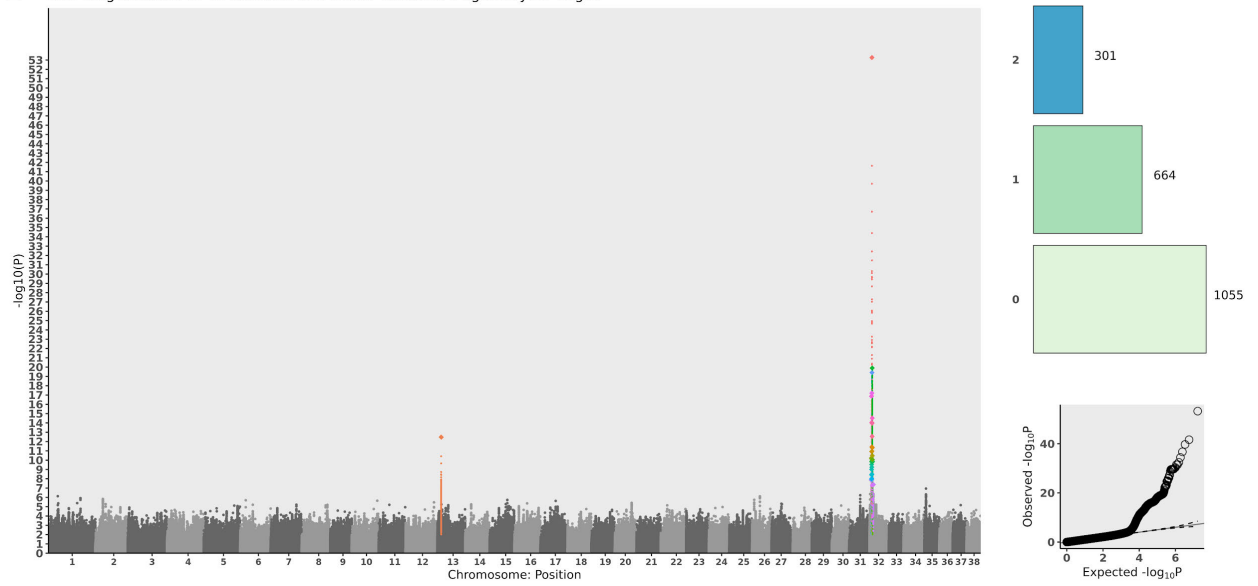

**F** Does DOG have soft fur or rough and bristly fur?

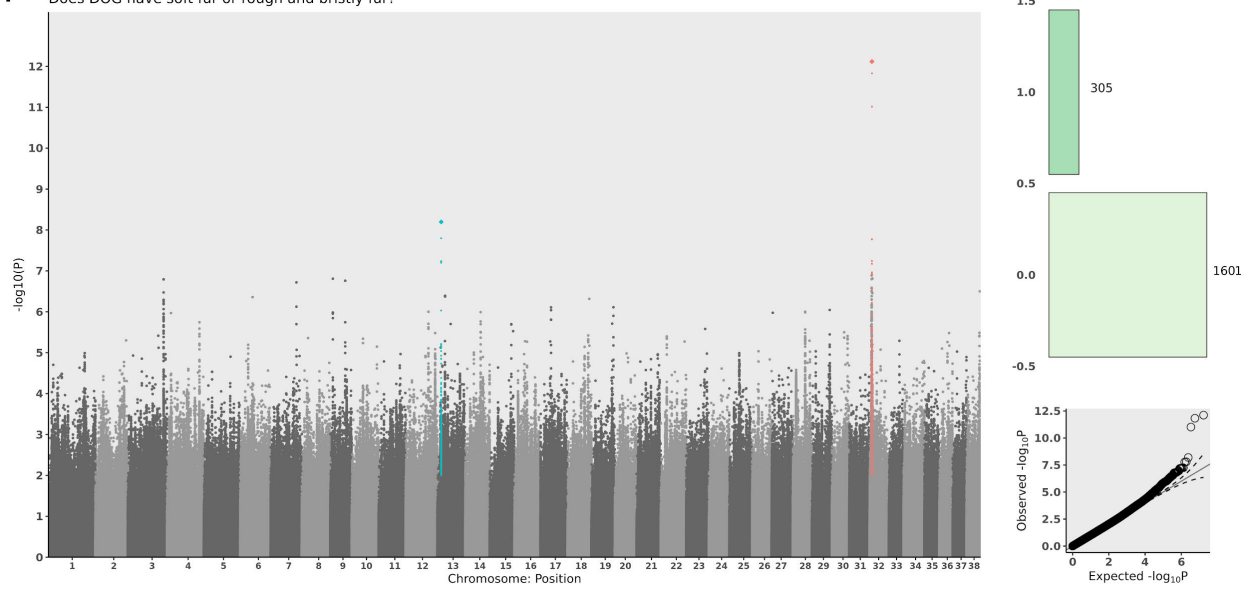

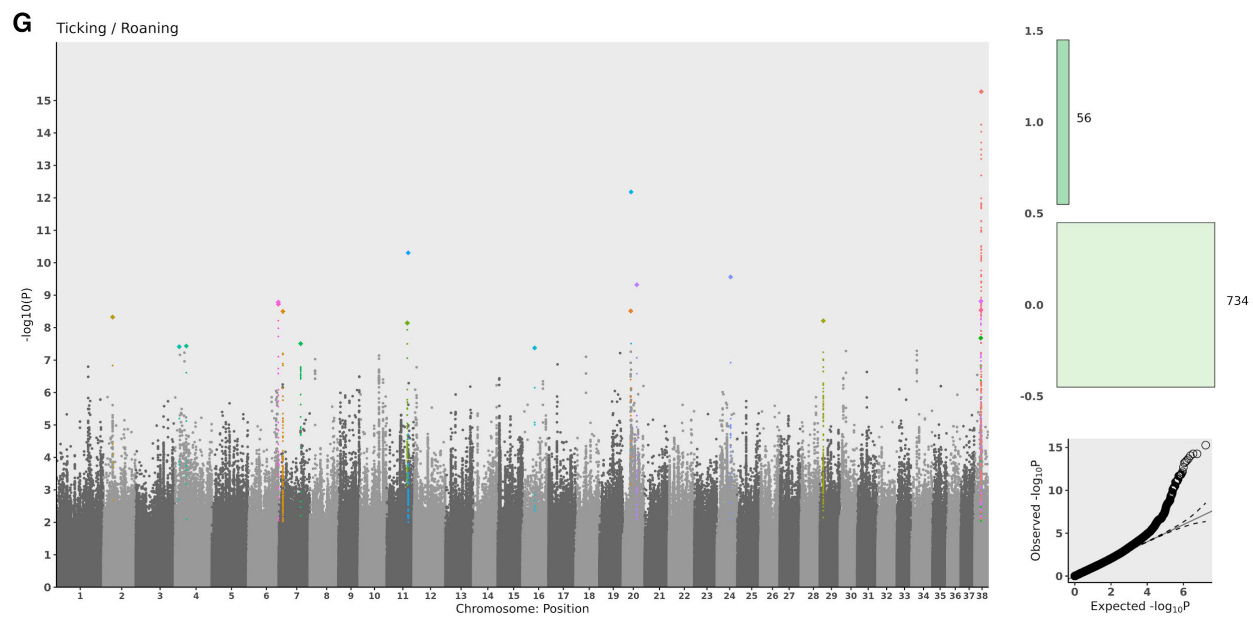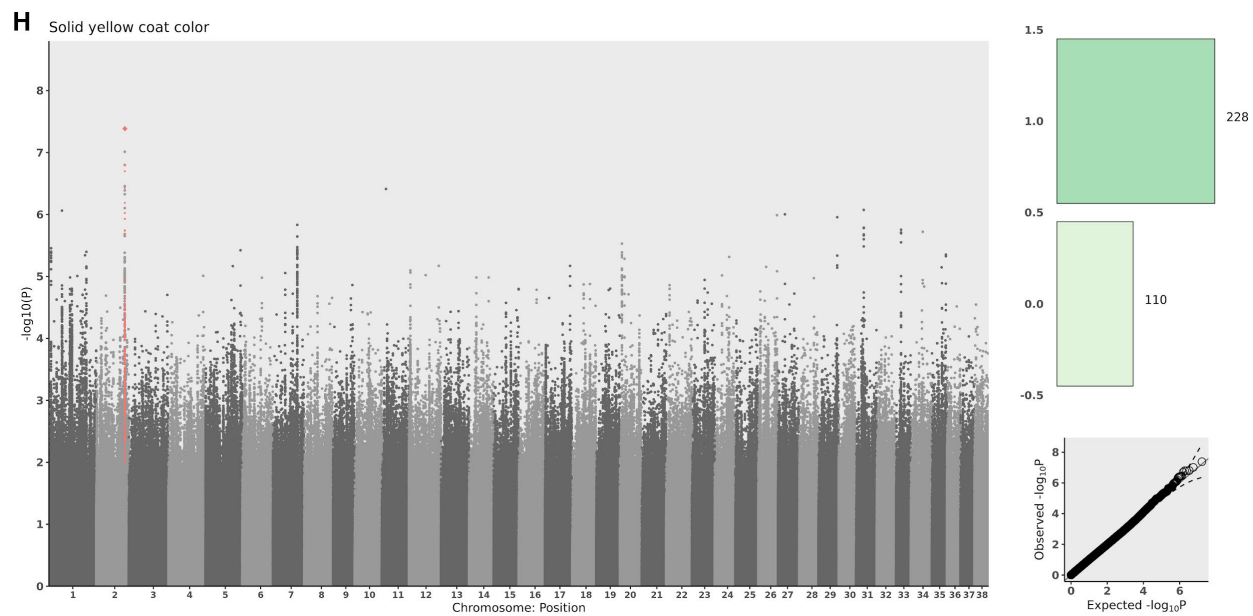

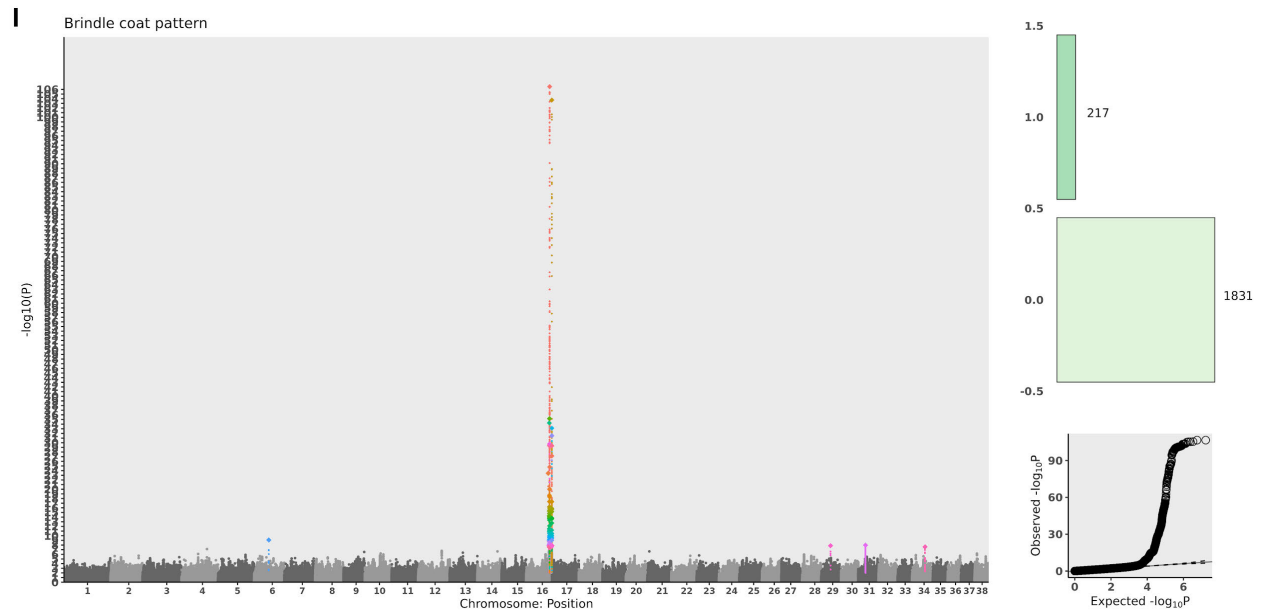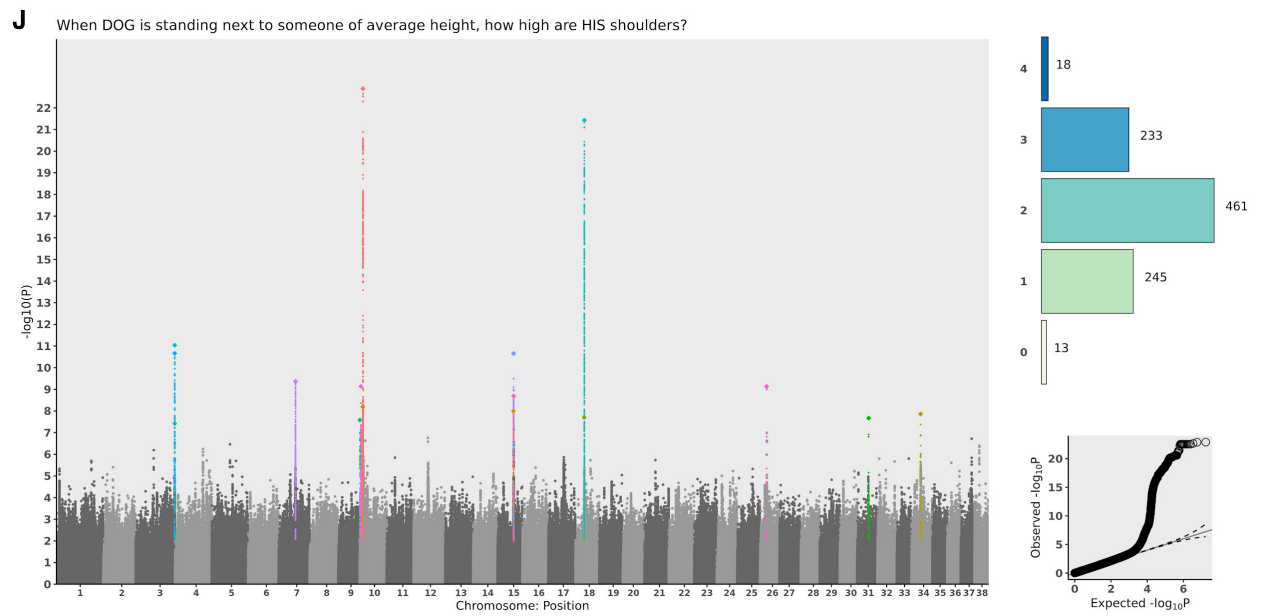

**K** DOG gets stuck behind objects and is unable to get around

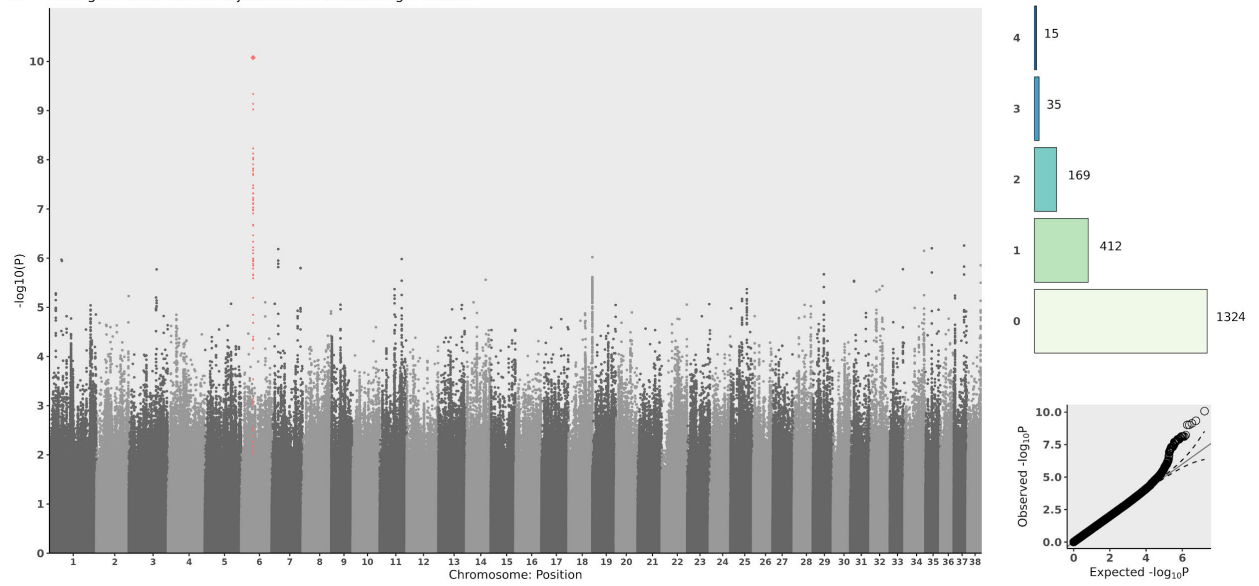

**L** DOG howls

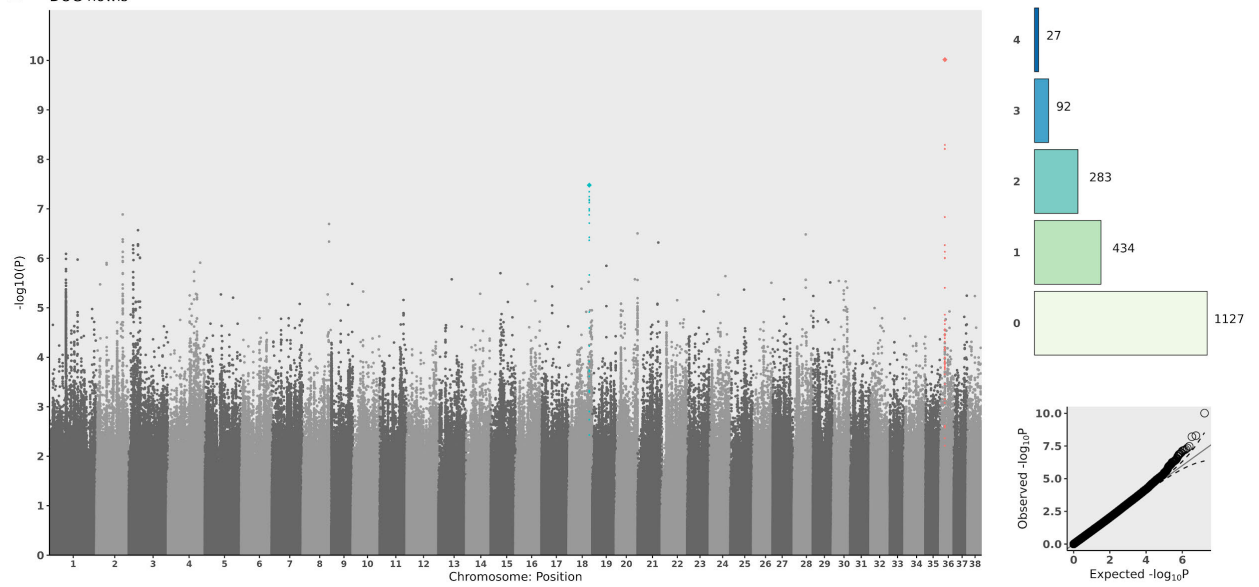

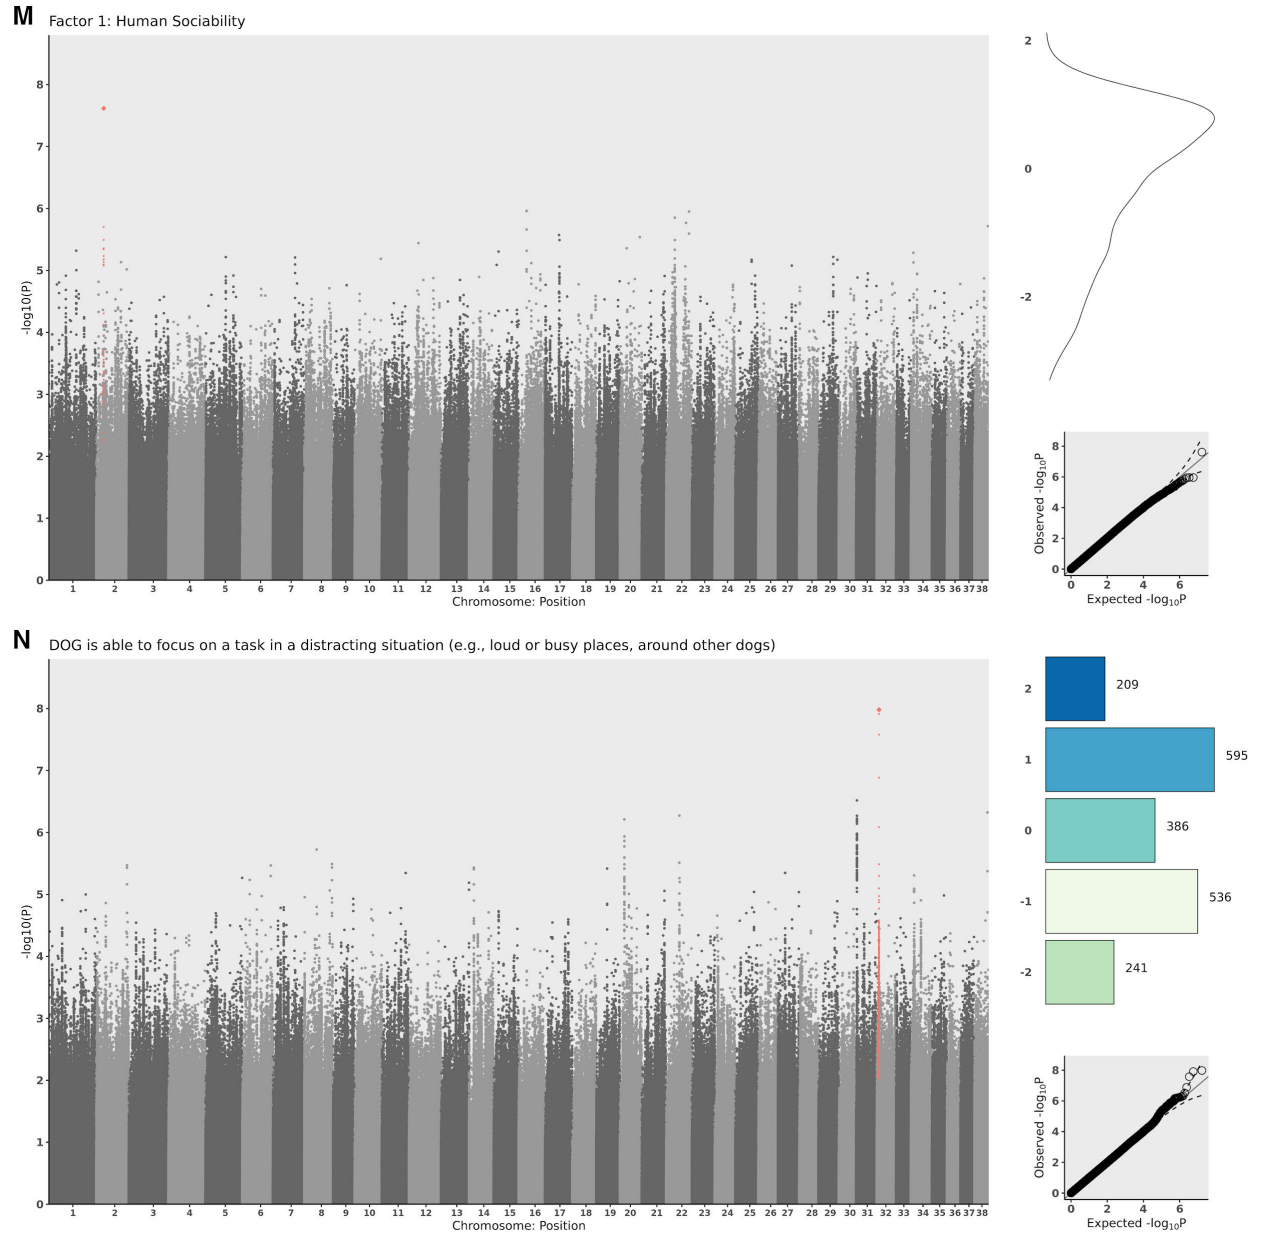

**Fig. S25. Genome-wide association studies.** All Manhattan plots with Q-Q plots and phenotype distributions for the genome-wide association studies for all traits have been published to Figshare (DOI: 10.6084/m9.figshare.16608793). Plots for the following phenotype studies shown are (A) body size as a quantitative trait in all dogs; (B) gigantism and (C) dwarfism as binary traits with average stature dogs as controls; several coat pigmentation phenotypes including (D) white spotting, (E) coat length, (F) coat texture, (G) roan and ticking coat patterns, (H) solid red coat color versus yellow coat color, (I) brindle coat pattern; (J) body size in highly admixed dogs with <45% breed ancestry; (K) Likert responses to whether dog “gets stuck behind objects and is unable to get around”; (L) whether dogs howl never, rarely, sometimes, often, or always; (M) human sociability factor scores; and (N) Likert responses to whether dog “is able to focus on a task in a distracting situation (e.g., loud or busy places, around other dogs)”.

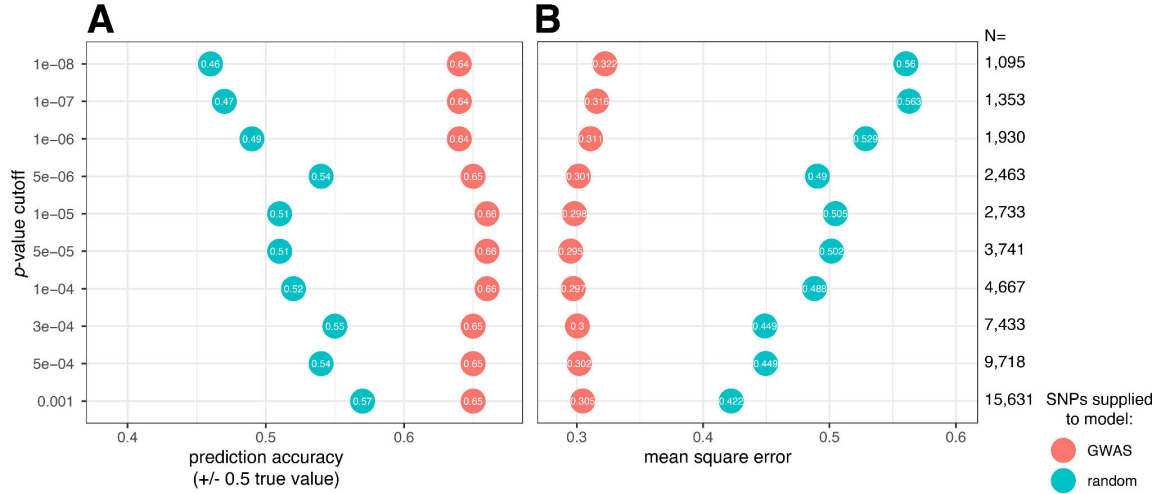

**Fig. S26. Size prediction model performance.** The optimal  $p$ -value cutoff is  $p$  from  $1 \times 10^{-5}$  to  $1 \times 10^{-4}$ , with (A) accuracy (defined as predicted value within +/- 0.5 of true value) falling at both higher and lower thresholds and (B) mean square error lowest at  $5 \times 10^{-5}$ . Random forest models drawing from GWAS-selected SNPs consistently outperform models drawing from a random pool of SNPs, which has an average prediction accuracy of  $0.52 \pm \text{SD}:0.05$ . Among models based on GWAS-selected SNPs, the most informative SNPs (defined as the top 100 ranked by Gini importance) carried absolute effect sizes of  $0.239 \pm \text{SD}:0.093$  in the height GWAS, a  $\sim 1.68$  fold-change compared to  $0.142 \pm \text{SD}:0.066$ , the effect sizes for all GWAS-selected SNPs used to build the model. The unselected models, too, derive predictive power from randomly drawn SNPs: the most informative SNPs carried absolute effect sizes of  $0.044 \pm \text{SD}:0.034$  in the GWAS, a  $\sim 1.69$  fold-change compared to  $0.026 \pm \text{SD}:0.024$ , effect sizes for all SNPs used to build the model.

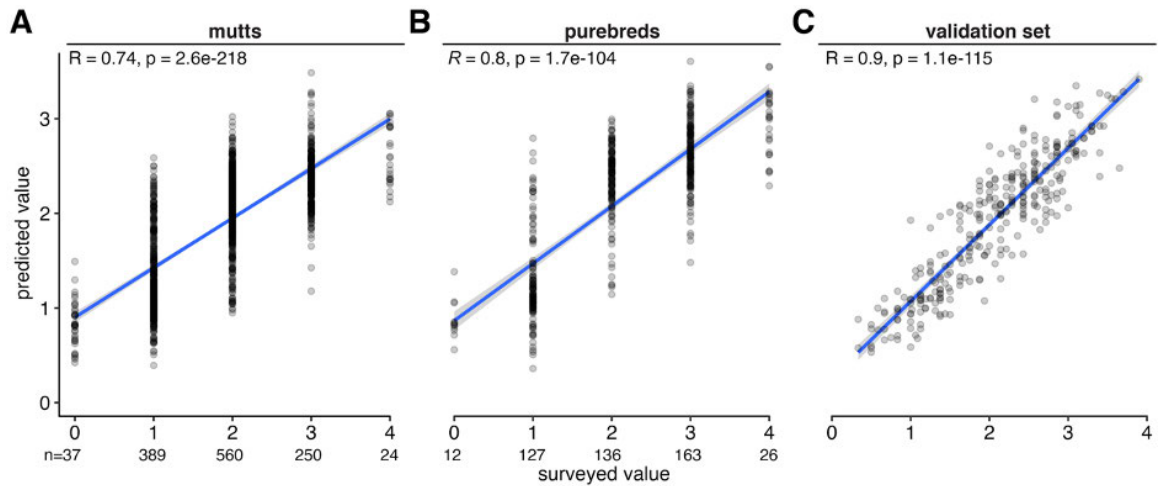

**Fig. S27. Genetic predictions of size phenotypes perform well in mutts and purebred dogs and validate against real size measurements.** Size predictions made for (A) mutts are just as accurate against their surveyed size as in (B) purebred dogs.

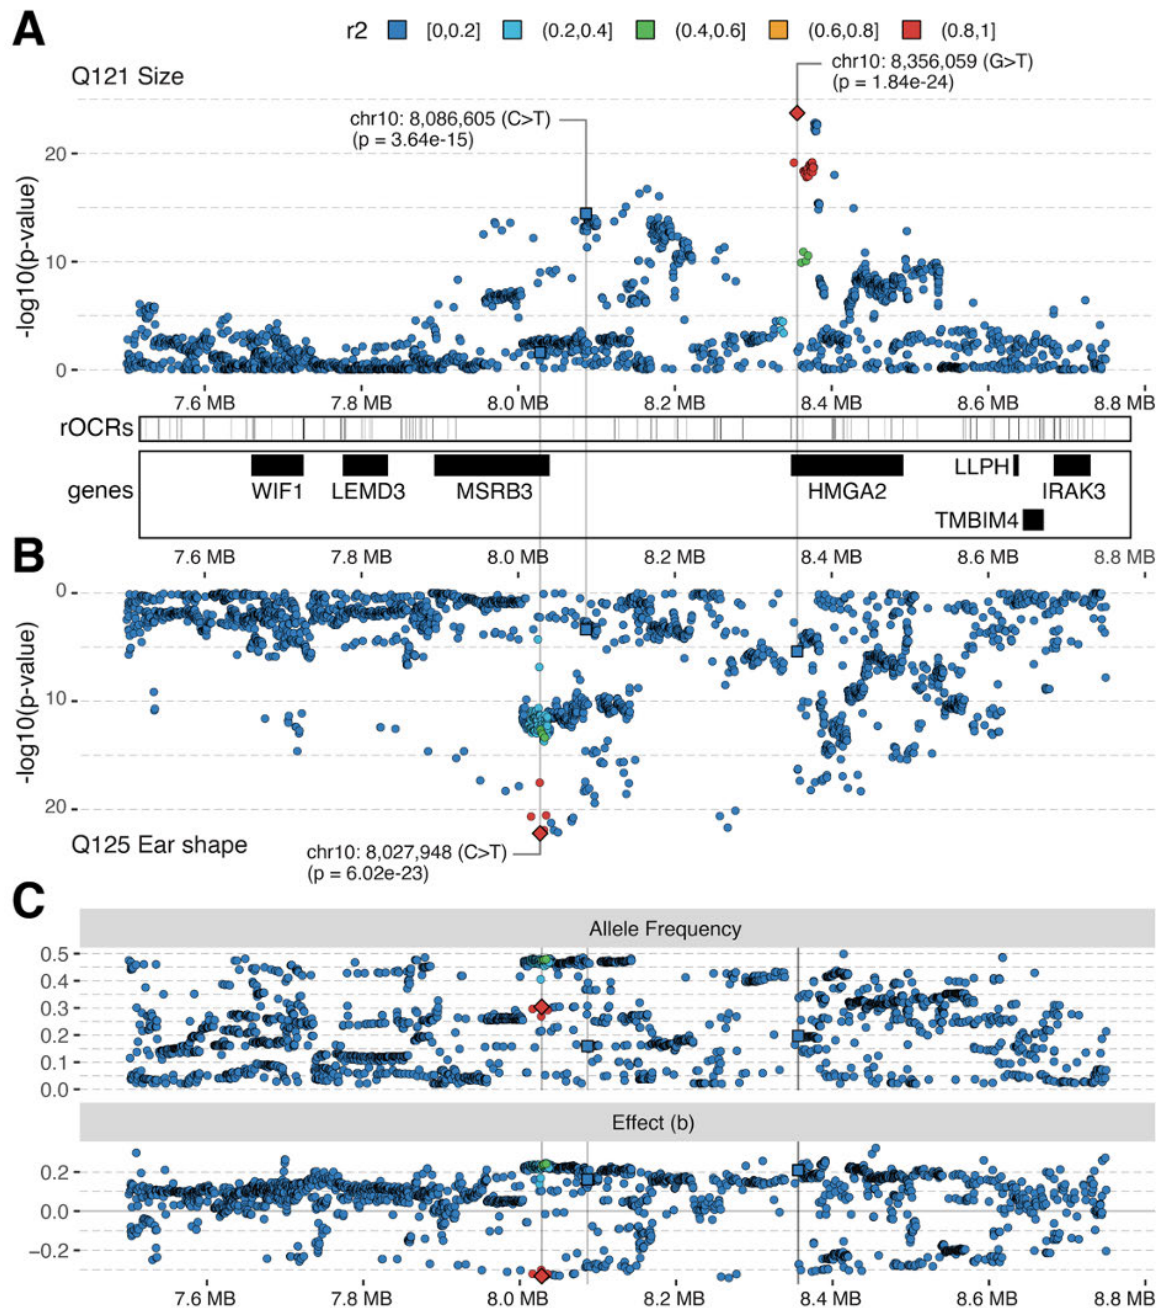

**Fig. S28. Resolving the ear shape and body size locus at chromosome 10.** Regional plots on chromosome 10 from 7.6 to 8.8 megabases (CanFam3.1) for association with (A) body size, colored by  $r^2$  linkage with top SNP at 8,356,059 (diamond), and (B) ear shape, colored by  $r^2$  linkage with top SNP at 8,027,948 (diamond). (C) The allele frequency and effect (beta) of the top ear shape-associated SNP.

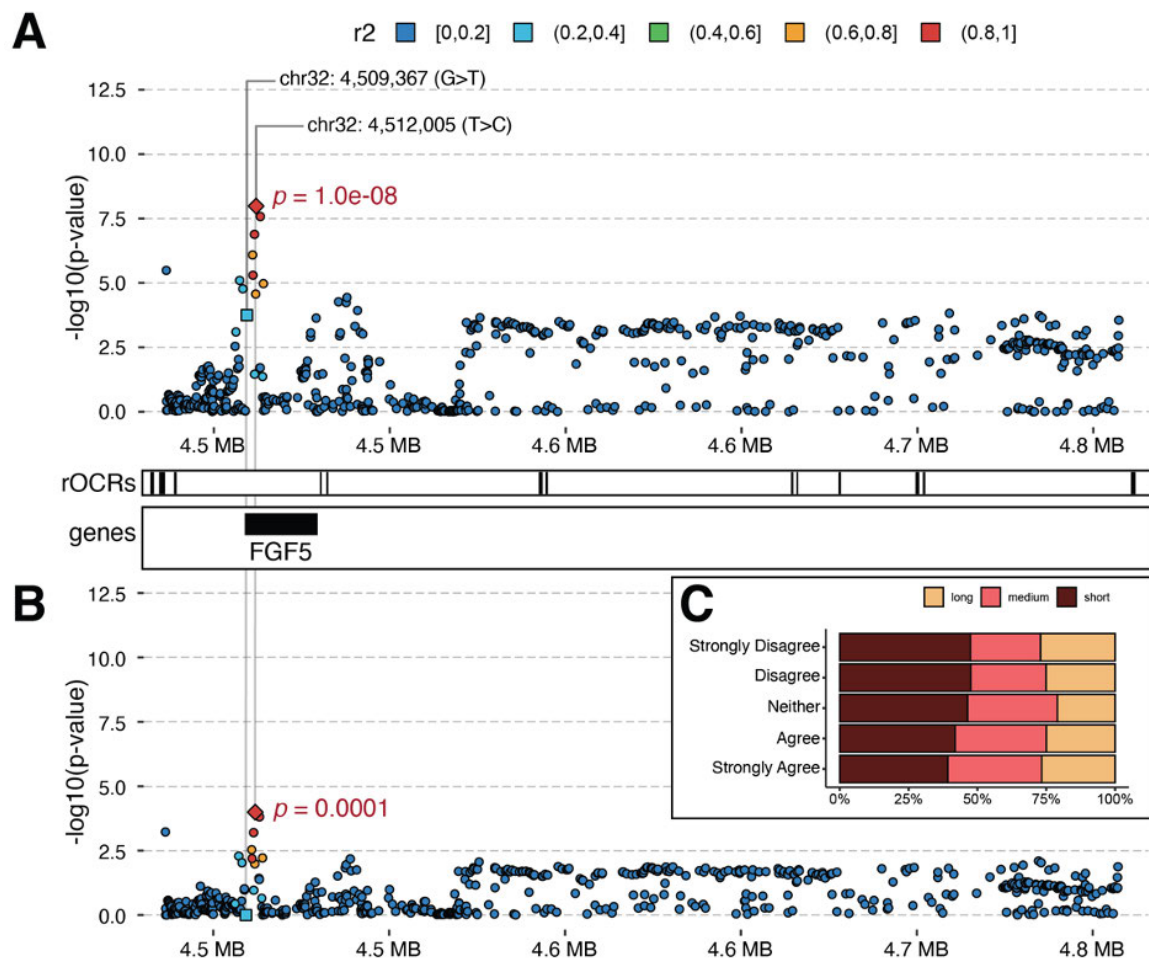

**Fig. S29. Confounding effects of breed-defining physical traits on genome-wide associations.** Regional association plots for (A) the locus on chromosome 32 associated with a dog's focus in distracting situations (Q21) with SNPs colored by  $r^2$  linkage with the top associated SNP (diamond) and (B) the locus after inclusion of genotypes for the SNP associated with coat length differences (square) as a covariate. (C) Survey responses for Q21 against reported coat length.

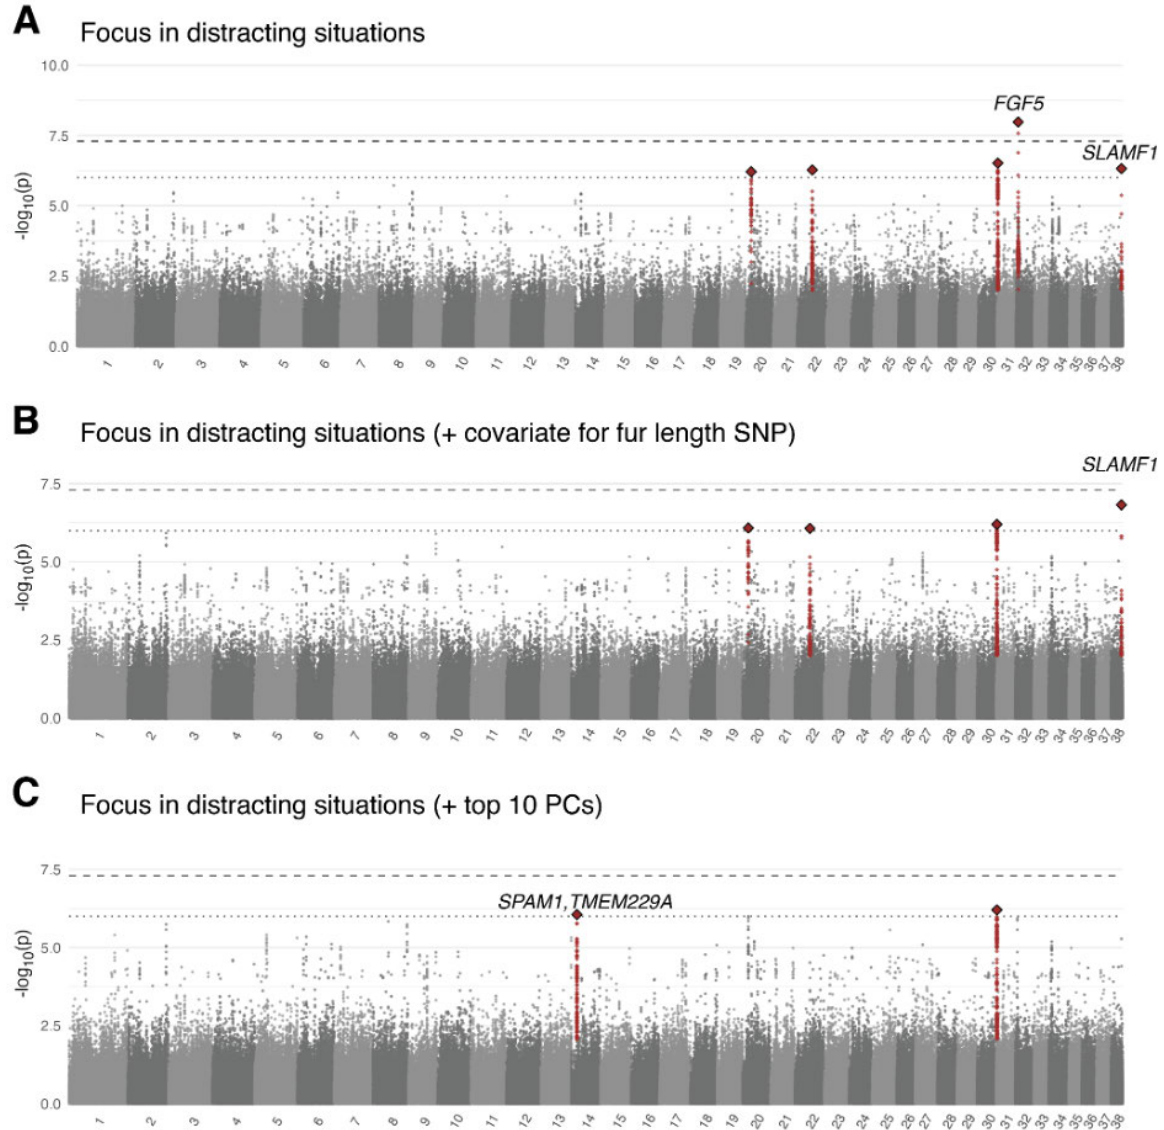

**Fig. S30. Breed-confounding physical traits can be addressed by controlling for the traits themselves or by adjusting for population structure.** (A) Before adding PCs to the mixed linear model, we identified one significant ( $p < 5 \times 10^{-8}$ ) peak at *FGF5* on chr32, a gene also associated with coat length, and 4 other suggestive ( $p < 1 \times 10^{-6}$ ) associations. (B) By including the fur length SNP in *FGF5* (chr32: 4,509,367), this association disappears ( $p=0.0001$ ) but suggestive associations remain. (C) After inclusion of the first 10 PCs, the association with *FGF5* ( $p=1.2 \times 10^{-6}$ ) drops in strength, as do other suggestive associations.

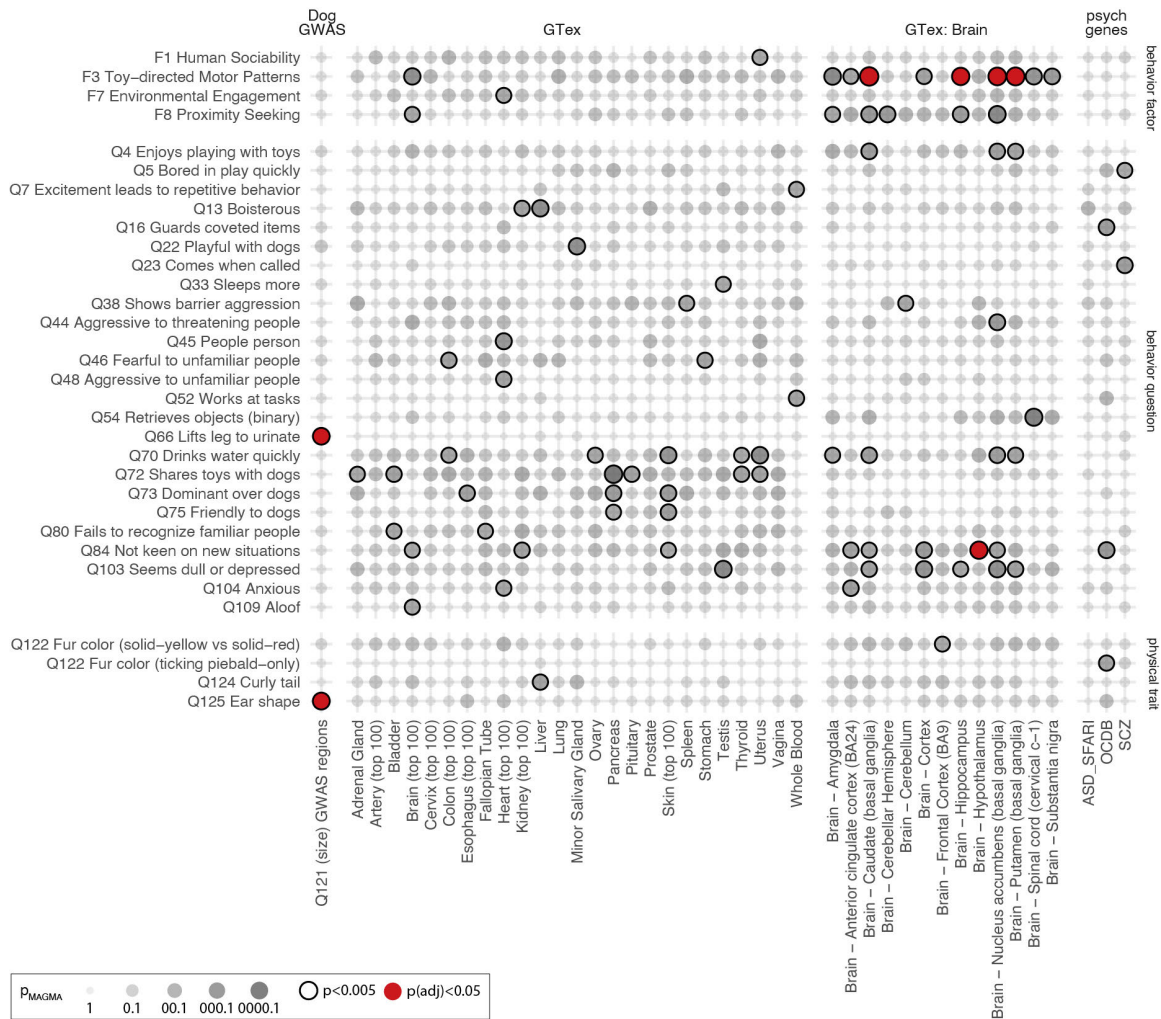

**Fig. S31. Gene set enrichment of associated regions.** The raw and FDR-adjusted (BH procedure)  $p$ -values for enrichment of trait associated SNPs upon (1) the canine body size GWAS regions, (2) top non-brain tissue-expressed genes from GTex, (3) top brain-expressed genes from GTex, and (4) psychiatric condition gene sets.

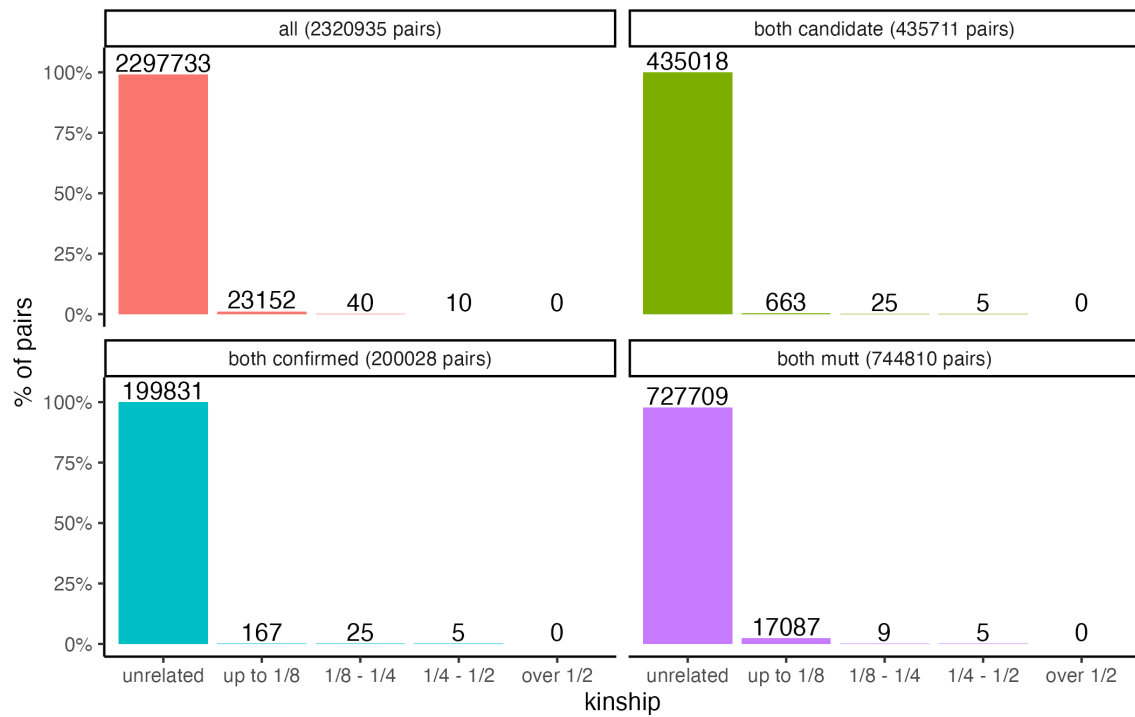

**Fig. S32. Kinship between pairs of dogs in the genetic data set.** We estimated kinship  $k$  using the KING-robust kinship estimator (118) and found only 28 pairs of dogs (0.0017%; 46 unique dogs) closely related ( $k > 0.2$ ).

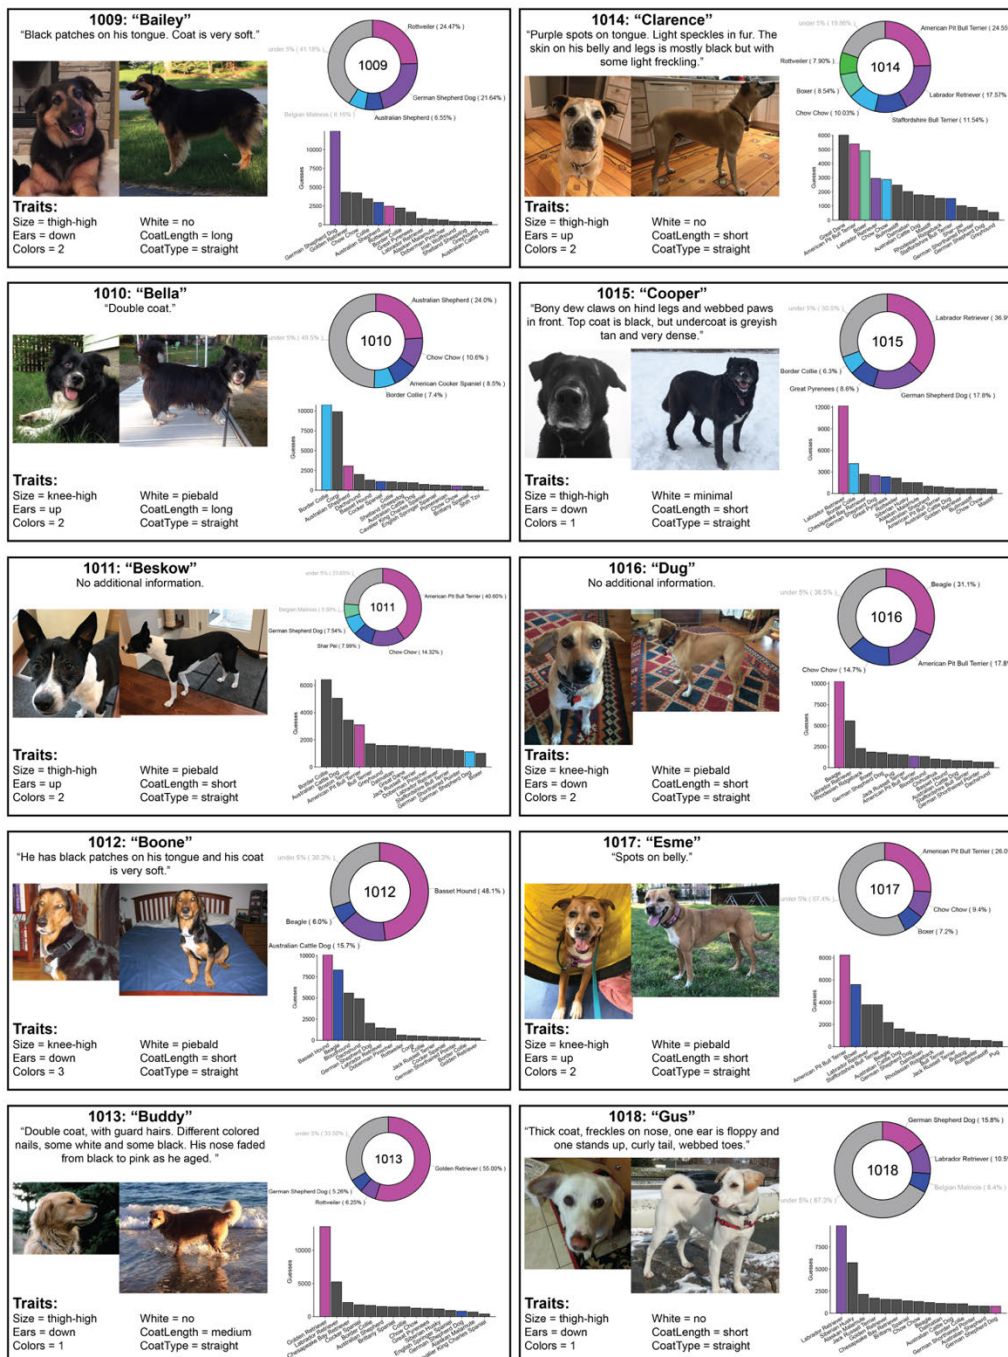

**Fig. S33. Dogs included in the MuttMix survey (page 1/4).** Front and side photographs and descriptions of the 30 mutts (black border) and single undeclared purebred (red). All photos and information were taken and provided by the dog owners for use in the public survey and research project.

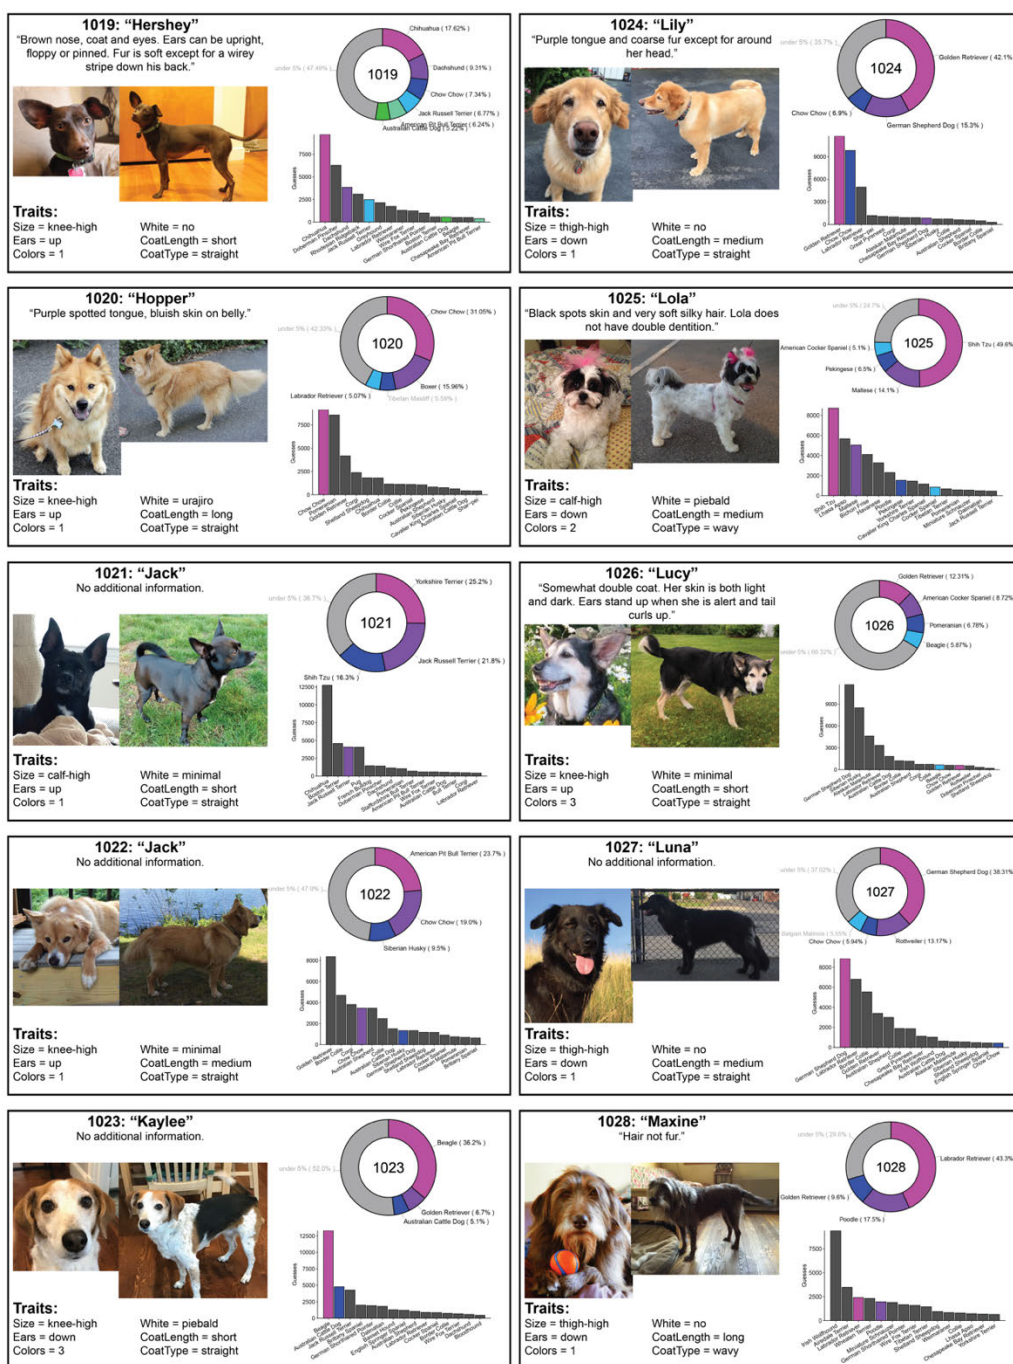

**Fig. S33. Dogs included in the MuttMix survey (page 2/4).** Front and side photographs and descriptions of the 30 mutts (black border) and single undeclared purebred (red). All photos and information were taken and provided by the dog owners for use in the public survey and research project.

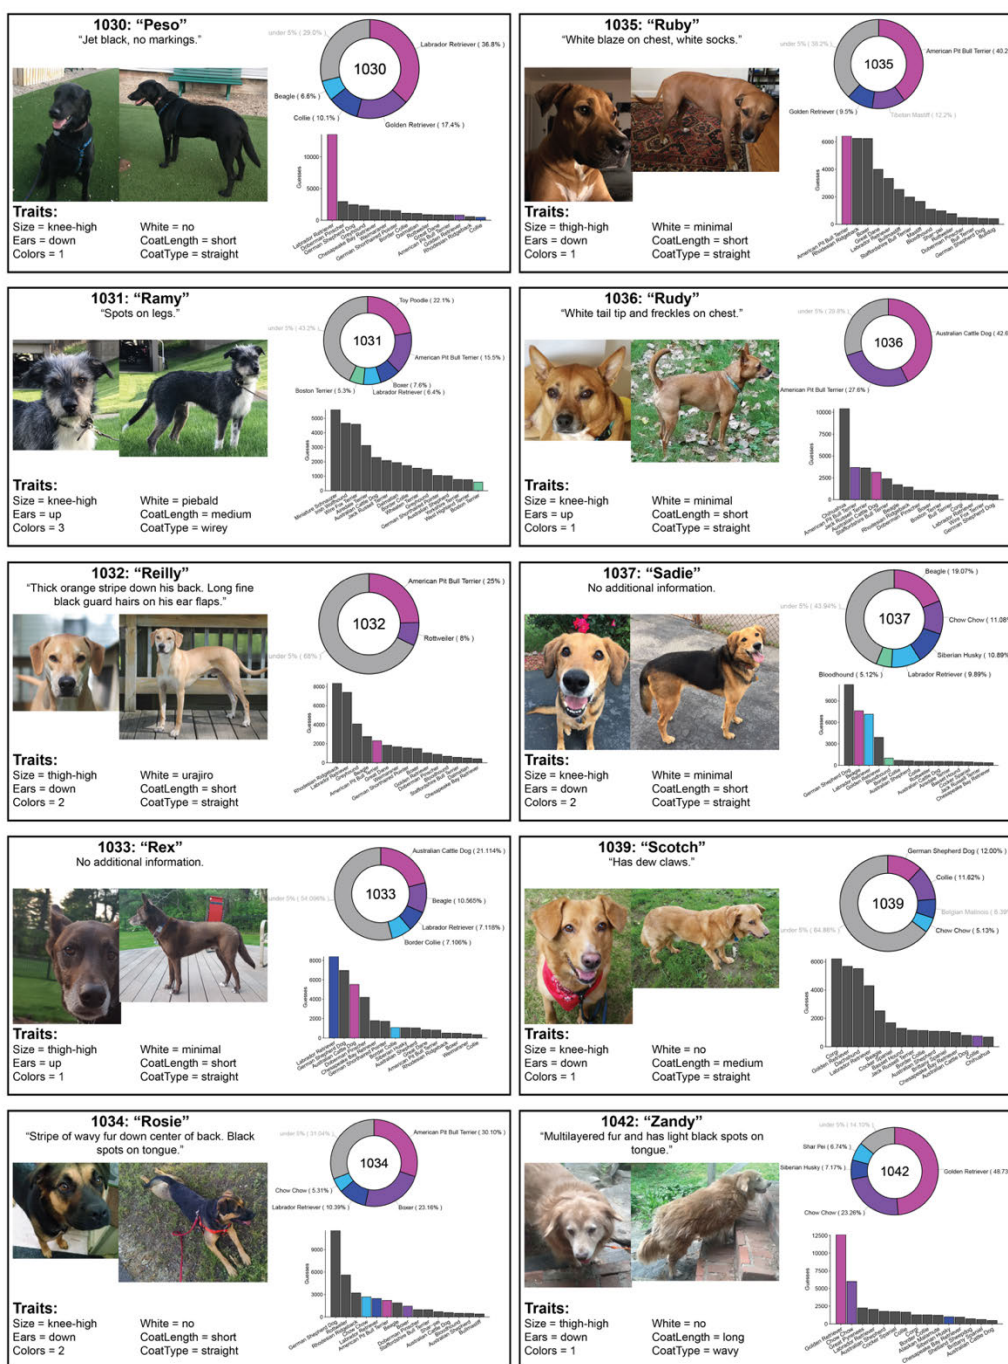

**Fig. S33. Dogs included in the MuttMix survey (page 3/4).** Front and side photographs and descriptions of the 30 mutts (black border) and single undeclared purebred (red). All photos and information were taken and provided by the dog owners for use in the public survey and research project.

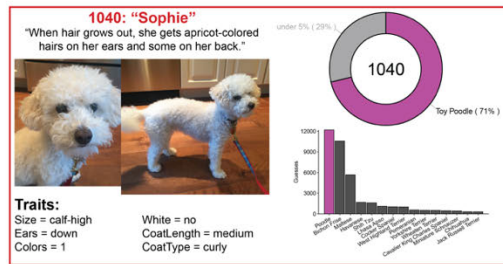

**Fig. S33. Dogs included in the MuttMix survey (page 4/4).** Front and side photographs and descriptions of the 30 mutts (black border) and single undeclared purebred (red). All photos and information were taken and provided by the dog owners for use in the public survey and research project.

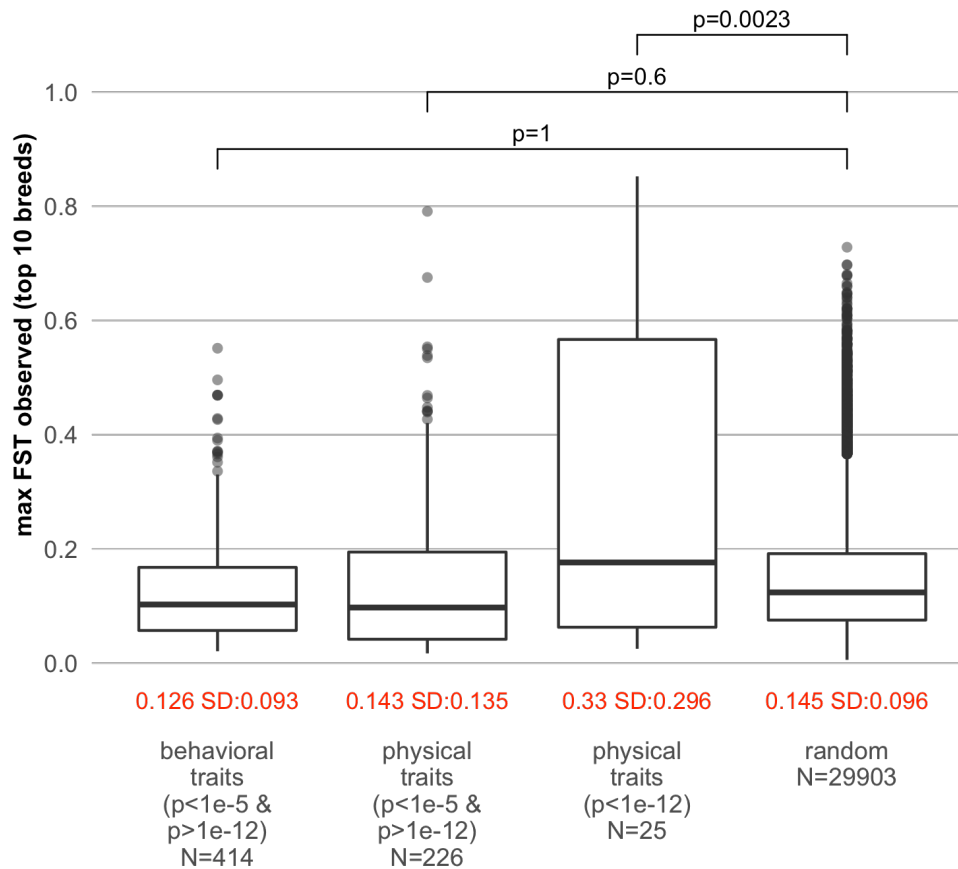

**Fig. S34. SNPs strongly associated with physical traits only are more differentiated between breeds than random loci.** For each SNP, we calculated the maximum  $F_{ST}$  observed between the one of the ten most common breeds in the GWAS dataset (American pit bull terrier, Australian cattle dog, beagle, border collie, Chihuahua, dachshund, German shepherd dog, golden retriever, Labrador retriever, toy poodle) and the full dog population. Brackets with p-values indicate whether each category of associated SNPs has higher  $F_{ST}$  values than randomly sampled SNPs (fourth column), measured using a one-sided t-test (*R* package `'stats'` version 4.1.1). Red text is the mean and standard deviation for each category. Boxplot: box encompasses the 25-75% of values with a thick horizontal line at the median; whiskers show the range of 5-95% of values; points represent values outside the 5-95% range.

**Table S1.** Survey questions in Darwin's Ark.

| Survey             | #  | Source | Question type  | Text                                                                                                     | Shorthand                               | Range        | Options*          | # Responses | Note on question type                                                             |
|--------------------|----|--------|----------------|----------------------------------------------------------------------------------------------------------|-----------------------------------------|--------------|-------------------|-------------|-----------------------------------------------------------------------------------|
| Play               | 1  | CHQLS  | other behavior | DOG enjoys life                                                                                          | Enjoys life                             | quantitative | Agree to disagree | 17,637      | play is characterized by expression of motor patterns such as chase and grab-bite |
|                    | 2  | CHQLS  | motor pattern  | DOG wants to play                                                                                        | Wants to play                           | quantitative | Agree to disagree | 17,564      |                                                                                   |
|                    | 3  | DIAS   | other behavior | DOG becomes aggressive when excited                                                                      | Aggressive when excited                 | quantitative | Agree to disagree | 17,559      |                                                                                   |
|                    | 4  | DPQ    | motor pattern  | DOG enjoys playing with toys                                                                             | Enjoys playing with toys                | quantitative | Agree to disagree | 17,566      | derivative of grab-bite motor pattern                                             |
|                    | 5  | DPQ    | other behavior | DOG gets bored in play quickly                                                                           | Bored in play quickly                   | quantitative | Agree to disagree | 17,524      |                                                                                   |
|                    | 6  | DPQ    | other behavior | DOG seeks constant activity                                                                              | Seeks constant activity                 | quantitative | Agree to disagree | 17,523      |                                                                                   |
|                    | 7  | DIAS   | other behavior | Excitement can lead DOG to fixed repetitive behavior                                                     | Excitement leads to repetitive behavior | quantitative | Agree to disagree | 17,536      |                                                                                   |
|                    | 8  | DIAS   | other behavior | DOG calms down very quickly after being excited                                                          | Calms down quickly                      | quantitative | Agree to disagree | 17,500      |                                                                                   |
|                    | 9  | DIAS   | other behavior | DOG may become aggressive if HE is frustrated with something                                             | Aggressive if frustrated                | quantitative | Agree to disagree | 17,499      |                                                                                   |
|                    | 10 | DIAS   | other behavior | DOG is not very patient                                                                                  | Not patient                             | quantitative | Agree to disagree | 17,127      |                                                                                   |
| Communication      | 11 | DPQ    | other behavior | DOG is relaxed when greeting people                                                                      | Relaxed when greeting people            | quantitative | Agree to disagree | 16,893      |                                                                                   |
|                    | 12 | DPQ    | other behavior | DOG is shy                                                                                               | Shy                                     | quantitative | Agree to disagree | 16,814      |                                                                                   |
|                    | 13 | DPQ    | other behavior | DOG is boisterous                                                                                        | Boisterous                              | quantitative | Agree to disagree | 16,839      |                                                                                   |
|                    | 14 | DIAS   | other behavior | DOG does not think before HE acts                                                                        | Does not think before acts              | quantitative | Agree to disagree | 16,796      |                                                                                   |
|                    | 15 | DIAS   | other behavior | DOG appears to be sorry after HE has done something wrong                                                | Sorry when wrong                        | quantitative | Agree to disagree | 16,790      |                                                                                   |
|                    | 16 | DPQ    | other behavior | DOG aggressively guards coveted items (e.g., stolen item, treats, food bowl)                             | Guards coveted items                    | quantitative | Agree to disagree | 16,807      |                                                                                   |
|                    | 17 | new    | motor pattern  | DOG howls                                                                                                | Howls                                   | quantitative | Never to always   | 16,777      | derivative of howling motor pattern                                               |
|                    | 18 | new    | motor pattern  | DOG Woo-woo barks                                                                                        | Woo-woo barks                           | quantitative | Never to always   | 16,799      | derivative of howling motor pattern                                               |
|                    | 19 | new    | other behavior | DOG whines when alone                                                                                    | Whines when alone                       | quantitative | Never to always   | 16,796      |                                                                                   |
|                    | 20 | new    | other behavior | DOG whines to get attention, food, or toys                                                               | Whines for attention food toys          | quantitative | Never to always   | 16,389      |                                                                                   |
| The Great Outdoors | 21 | DPQ    | other behavior | DOG is able to focus on a task in a distracting situation (e.g., loud or busy places, around other dogs) | Focus in distracting situation          | quantitative | Agree to disagree | 16,519      |                                                                                   |
|                    | 22 | DPQ    | other behavior | DOG is playful with other dogs                                                                           | Playful with dogs                       | quantitative | Agree to disagree | 16,418      |                                                                                   |
|                    | 23 | DPQ    | other behavior | When off leash, DOG comes immediately when called                                                        | Comes when called                       | quantitative | Agree to disagree | 16,413      |                                                                                   |
|                    | 24 | DPQ    | other behavior | DOG likes to chase squirrels, birds, or other small animals                                              | Chases small animals                    | quantitative | Agree to disagree | 16,413      |                                                                                   |
|                    | 25 | CHQLS  | other behavior | DOG moves normally                                                                                       | Moves normally                          | quantitative | Agree to disagree | 16,452      |                                                                                   |
|                    | 26 | CHQLS  | other behavior | DOG is as active as HE has been                                                                          | As active as has been                   | quantitative | Agree to disagree | 16,414      |                                                                                   |
|                    | 27 | DIAS   | other behavior | DOG shows extreme physical signs when excited                                                            | Extreme physical signs when excited     | quantitative | Agree to disagree | 16,419      |                                                                                   |
|                    | 28 | new    | other behavior | DOG eats grass                                                                                           | Eats grass                              | quantitative | Never to always   | 16,413      |                                                                                   |
|                    | 29 | new    | motor pattern  | DOG buries toys / bones                                                                                  | Buries toys                             | quantitative | Never to always   | 16,401      | derivative of caching motor pattern                                               |
|                    | 30 | new    | other behavior | DOG eats non-food items                                                                                  | Eats non-food items                     | quantitative | Never to always   | 16,007      |                                                                                   |
| Independence       | 31 | DPQ    | other behavior | DOG ignores commands                                                                                     | Ignores commands                        | quantitative | Agree to disagree | 16,077      |                                                                                   |
|                    | 32 | DPQ    | other behavior | DOG is quick to sneak out through open doors, gates                                                      | Quick to sneak out doors                | quantitative | Agree to disagree | 15,969      |                                                                                   |
|                    | 33 | CHQLS  | other behavior | DOG sleeps more, is less awake                                                                           | Sleeps more                             | quantitative | Agree to disagree | 15,987      |                                                                                   |
|                    | 34 | DPQ    | other behavior | DOG is slow to respond to corrections                                                                    | Slow to respond to corrections          | quantitative | Agree to disagree | 15,962      |                                                                                   |
|                    | 35 | new    | other behavior | DOG escapes from cages, kennels, or enclosures                                                           | Escapes from enclosures                 | quantitative | Never to always   | 15,979      |                                                                                   |
|                    | 36 | CCDR   | other behavior | DOG gets stuck behind objects and is unable to get around                                                | Gets stuck behind objects               | quantitative | Never to always   | 15,978      |                                                                                   |
|                    | 37 | CCDR   | other behavior | DOG walks away or avoids being patted                                                                    | Avoids being patted                     | quantitative | Never to always   | 15,959      |                                                                                   |
|                    | 38 | new    | other behavior | DOG shows barrier aggression                                                                             | Shows barrier aggression                | quantitative | Never to always   | 15,997      |                                                                                   |
|                    | 39 | CHQLS  | other behavior | DOG lays in one place all day long                                                                       | Lays in one place                       | quantitative | Never to always   | 15,986      |                                                                                   |
|                    | 40 | new    | other behavior | DOG damages doors, gates, or walls                                                                       | Damages doors                           | quantitative | Never to always   | 15,584      |                                                                                   |

| Survey                     | #  | Source | Question type          | Text                                                                                                                    | Shorthand                           | Range        | Options*          | # Responses | Note on question type                                      |
|----------------------------|----|--------|------------------------|-------------------------------------------------------------------------------------------------------------------------|-------------------------------------|--------------|-------------------|-------------|------------------------------------------------------------|
| Socialization with Humans  | 41 | DIAS   | other behavior         | DOG doesn't like to be approached or hugged                                                                             | Dislikes being approached or hugged | quantitative | Agree to disagree | 15,919      |                                                            |
|                            | 42 | DPQ    | other behavior         | DOG is friendly towards unfamiliar people                                                                               | Friendly to unfamiliar people       | quantitative | Agree to disagree | 15,822      |                                                            |
|                            | 43 | CHQLS  | other behavior         | DOG responds to my presence                                                                                             | Responds to my presence             | quantitative | Agree to disagree | 15,836      |                                                            |
|                            | 44 | DPQ    | other behavior         | DOG behaves aggressively in response to perceived threats from people (e.g., being cornered, having collar reached for) | Aggressive to threatening people    | quantitative | Agree to disagree | 15,853      |                                                            |
|                            | 45 | new    | other behavior         | DOG is a people person                                                                                                  | People person                       | quantitative | Agree to disagree | 15,837      |                                                            |
|                            | 46 | DPQ    | other behavior         | DOG behaves fearfully towards unfamiliar people                                                                         | Fearful to unfamiliar people        | quantitative | Agree to disagree | 15,796      |                                                            |
|                            | 47 | DIAS   | other behavior         | DOG seems to get excited for no reason                                                                                  | Excited for no reason               | quantitative | Agree to disagree | 15,817      |                                                            |
|                            | 48 | DPQ    | other behavior         | DOG behaves aggressively towards unfamiliar people                                                                      | Aggressive to unfamiliar people     | quantitative | Agree to disagree | 15,831      |                                                            |
|                            | 49 | DPQ    | other behavior         | DOG seeks companionship from people                                                                                     | Seeks companionship from people     | quantitative | Agree to disagree | 15,825      |                                                            |
|                            | 50 | new    | other behavior         | DOG must greet everyone who comes to the door                                                                           | Must greet everyone                 | quantitative | Agree to disagree | 15,428      |                                                            |
| Hunting                    | 51 | DPQ    | other behavior         | DOG chases bicycles, joggers, and skateboarders                                                                         | Chases bicycles or joggers          | quantitative | Agree to disagree | 15,342      |                                                            |
|                            | 52 | DPQ    | other behavior         | DOG works at tasks (e.g., getting treats out of a Kong, shredding toys) until entirely finished                         | Works at tasks                      | quantitative | Agree to disagree | 15,256      |                                                            |
|                            | 53 | DPQ    | other behavior         | DOG leaves food or objects alone when told to do so                                                                     | Leaves food or objects when told    | quantitative | Agree to disagree | 15,231      |                                                            |
|                            | 54 | DPQ    | motor pattern          | DOG retrieves objects (e.g., balls, toys, sticks)                                                                       | Retrieves objects                   | quantitative | Agree to disagree | 15,269      | derivative of chase/grab-bite motor pattern                |
|                            | 55 | DIAS   | other behavior         | DOG appears to have a lot of control over how HE responds                                                               | Control over responses              | quantitative | Agree to disagree | 15,250      |                                                            |
|                            | 56 | DIAS   | other behavior         | DOG reacts very quickly                                                                                                 | Reacts very quickly                 | quantitative | Agree to disagree | 15,271      |                                                            |
|                            | 57 | DIAS   | other behavior         | DOG is easy to train                                                                                                    | Easy to train                       | quantitative | Agree to disagree | 15,286      |                                                            |
|                            | 58 | DIAS   | other behavior         | DOG can be very persistent                                                                                              | Very persistent                     | quantitative | Agree to disagree | 15,266      |                                                            |
|                            | 59 | new    | motor pattern          | DOG points                                                                                                              | Points                              | quantitative | Agree to disagree | 15,249      | derivative of eye-stalk motor pattern                      |
|                            | 60 | new    | physical trait related | DOG avoids getting wet                                                                                                  | Avoids getting wet                  | quantitative | Agree to disagree | 14,882      | potentially influenced by presence or absence of undercoat |
| The Ins and Outs           | 61 | CCDR   | other behavior         | DOG has difficulty finding food dropped on the floor                                                                    | Difficulty finding dropped food     | quantitative | Never to always   | 15,110      |                                                            |
|                            | 62 | new    | other behavior         | DOG licks HIS empty bowl after finishing the food                                                                       | Licks empty bowl                    | quantitative | Never to always   | 15,016      |                                                            |
|                            | 63 | new    | other behavior         | DOG licks tile / linoleum floors                                                                                        | Licks tile floors                   | quantitative | Never to always   | 15,038      |                                                            |
|                            | 64 | new    | other behavior         | DOG turns in circles before pooping                                                                                     | Circles before pooping              | quantitative | Never to always   | 15,031      |                                                            |
|                            | 65 | new    | other behavior         | DOG kicks or scratches the ground after defecating                                                                      | Kicks ground after defecating       | quantitative | Never to always   | 15,026      |                                                            |
|                            | 66 | new    | physical trait related | DOG lifts HIS leg to urinate                                                                                            | Lifts leg to urinate                | quantitative | Never to always   | 15,024      | potentially related to hip/joint morphology or leg length  |
|                            | 67 | new    | other behavior         | DOG marks with feces                                                                                                    | Marks with feces                    | quantitative | Never to always   | 15,021      |                                                            |
|                            | 68 | new    | other behavior         | DOG eats HIS own feces                                                                                                  | Eats own feces                      | quantitative | Never to always   | 15,068      |                                                            |
|                            | 69 | new    | other behavior         | DOG shows submissive urination                                                                                          | Submissive urination                | quantitative | Never to always   | 15,023      |                                                            |
|                            | 70 | new    | physical trait related | DOG drinks water quickly                                                                                                | Drinks water quickly                | quantitative | Never to always   | 14,677      | potentially related to dog size and/or face shape          |
| Socialization with Animals | 71 | DPQ    | other behavior         | DOG behaves aggressively toward other dogs                                                                              | Aggressive to dogs                  | quantitative | Agree to disagree | 14,903      |                                                            |
|                            | 72 | DPQ    | other behavior         | DOG willingly shares HIS toys with other dogs                                                                           | Shares toys with dogs               | quantitative | Agree to disagree | 14,798      |                                                            |
|                            | 73 | DPQ    | other behavior         | DOG is dominant over other dogs                                                                                         | Dominant over dogs                  | quantitative | Agree to disagree | 14,842      |                                                            |
|                            | 74 | DPQ    | other behavior         | DOG avoids other dogs                                                                                                   | Avoids dogs                         | quantitative | Agree to disagree | 14,833      |                                                            |
|                            | 75 | DPQ    | other behavior         | DOG is friendly towards other dogs                                                                                      | Friendly to dogs                    | quantitative | Agree to disagree | 14,839      |                                                            |
|                            | 76 | new    | other behavior         | DOG knows HE is a dog                                                                                                   | Knows is a dog                      | quantitative | Agree to disagree | 14,823      |                                                            |
|                            | 77 | DPQ    | other behavior         | DOG behaves fearfully towards other dogs                                                                                | Fearful to dogs                     | quantitative | Agree to disagree | 14,818      |                                                            |
|                            | 78 | DPQ    | other behavior         | DOG behaves aggressively towards cats                                                                                   | Aggressive to cats                  | quantitative | Agree to disagree | 14,814      |                                                            |
|                            | 79 | DPQ    | other behavior         | DOG is assertive or pushy with other dogs (e.g., if in a home with other dogs, when greeting)                           | Assertive with dogs                 | quantitative | Agree to disagree | 14,834      |                                                            |
|                            | 80 | CCDR   | other behavior         | DOG sometimes fails to recognize familiar people or pets                                                                | Fails to recognize familiar people  | quantitative | Agree to disagree | 14,434      |                                                            |

| Survey                     | #   | Source         | Question type          | Text                                                                                                     | Shorthand                    | Range           | Options*                                                                                                                                                                                                                | # Responses | Note on question type                                          |
|----------------------------|-----|----------------|------------------------|----------------------------------------------------------------------------------------------------------|------------------------------|-----------------|-------------------------------------------------------------------------------------------------------------------------------------------------------------------------------------------------------------------------|-------------|----------------------------------------------------------------|
| Coping with the Unfamiliar | 81  | DIAS, DPQ      | other behavior         | DOG is very interested in and adapts easily to new things and new places                                 | Interested in new things     | quantitative    | Agree to disagree                                                                                                                                                                                                       | 14,599      |                                                                |
|                            | 82  | DPQ            | other behavior         | DOG exhibits fearful behaviors when HE is restrained                                                     | Fearful when restrained      | quantitative    | Agree to disagree                                                                                                                                                                                                       | 14,503      |                                                                |
|                            | 83  | DPQ            | other behavior         | DOG behaves fearfully when groomed (e.g., nails trimmed, brushed, bathed, ears cleaned)                  | Fearful when groomed         | quantitative    | Agree to disagree                                                                                                                                                                                                       | 14,546      |                                                                |
|                            | 84  | DIAS           | other behavior         | DOG is not keen to go into new situations                                                                | Not keen on new situations   | quantitative    | Agree to disagree                                                                                                                                                                                                       | 14,494      |                                                                |
|                            | 85  | DPQ            | other behavior         | DOG behaves aggressively during visits to the veterinarian                                               | Aggressive at vet            | quantitative    | Agree to disagree                                                                                                                                                                                                       | 14,511      |                                                                |
|                            | 86  | new            | other behavior         | DOG is highly sensitive to noise                                                                         | Sensitive to noise           | quantitative    | Agree to disagree                                                                                                                                                                                                       | 14,526      |                                                                |
|                            | 87  | DPQ            | other behavior         | DOG shows aggression when nervous or fearful                                                             | Aggression when nervous      | quantitative    | Agree to disagree                                                                                                                                                                                                       | 14,516      |                                                                |
|                            | 88  | DPQ            | other behavior         | DOG behaves fearfully during visits to the veterinarian                                                  | Fearful at vet               | quantitative    | Agree to disagree                                                                                                                                                                                                       | 14,503      |                                                                |
|                            | 89  | DIAS           | other behavior         | DOG takes a long time to lose interest in new things                                                     | Slow to lose interest in new | quantitative    | Agree to disagree                                                                                                                                                                                                       | 14,523      |                                                                |
|                            | 90  | new            | other behavior         | DOG is afraid of storms                                                                                  | Afraid of storms             | quantitative    | Agree to disagree                                                                                                                                                                                                       | 14,187      |                                                                |
| Body Language              | 91  | DPQ            | other behavior         | DOG behaves submissively (e.g., rolls over, avoids eye contact, licks HIS lips) when greeting other dogs | Submissive to dogs           | quantitative    | Agree to disagree                                                                                                                                                                                                       | 14,485      |                                                                |
|                            | 92  | new            | physical trait related | DOG rests frog style                                                                                     | Rests frog style             | quantitative    | Never to always                                                                                                                                                                                                         | 14,415      | potentially related to hip morphology                          |
|                            | 93  | CCDR           | other behavior         | DOG paces up and down, walks in circles and/or wanders with no direction or purpose                      | Paces or circles or wanders  | quantitative    | Agree to disagree                                                                                                                                                                                                       | 14,376      |                                                                |
|                            | 94  | CHQLS          | physical trait related | DOG pants frequently, even at rest                                                                       | Pants frequently             | quantitative    | Agree to disagree                                                                                                                                                                                                       | 14,395      | potentially related to dog size and/or face shape              |
|                            | 95  | CCDR           | other behavior         | DOG stares blankly at the walls or floor                                                                 | Stares blankly               | quantitative    | Never to always                                                                                                                                                                                                         | 14,385      |                                                                |
|                            | 96  | new            | physical trait related | DOG tilts HIS head                                                                                       | Tilts head                   | quantitative    | Never to always                                                                                                                                                                                                         | 14,424      | potentially related to ear shape or skull shape                |
|                            | 97  | CHQLS          | physical trait related | DOG shakes or trembles occasionally                                                                      | Shakes occasionally          | quantitative    | Agree to disagree                                                                                                                                                                                                       | 14,388      | potentially related to dog size and capacity to thermoregulate |
|                            | 98  | new            | physical trait related | DOG crosses HIS front paws                                                                               | Crosses front paws           | quantitative    | Never to always                                                                                                                                                                                                         | 14,393      | potentially influenced by bone & joint morphology              |
|                            | 99  | new            | other behavior         | DOG shows handedness or side-preference                                                                  | Shows handedness             | quantitative    | Never to always                                                                                                                                                                                                         | 14,415      |                                                                |
|                            | 100 | new            | other behavior         | DOG places HIS paw on my or other people's feet                                                          | Places paw on people's feet  | quantitative    | Never to always                                                                                                                                                                                                         | 14,059      |                                                                |
| Attitude                   | 101 | DPQ            | other behavior         | DOG is lethargic                                                                                         | Lethargic                    | quantitative    | Agree to disagree                                                                                                                                                                                                       | 14,095      |                                                                |
|                            | 102 | DPQ            | other behavior         | DOG is confident                                                                                         | Confident                    | quantitative    | Agree to disagree                                                                                                                                                                                                       | 14,055      |                                                                |
|                            | 103 | CHQLS          | other behavior         | DOG seems dull or depressed, not alert                                                                   | Seems dull or depressed      | quantitative    | Agree to disagree                                                                                                                                                                                                       | 14,049      |                                                                |
|                            | 104 | DPQ            | other behavior         | DOG is anxious                                                                                           | Anxious                      | quantitative    | Agree to disagree                                                                                                                                                                                                       | 14,073      |                                                                |
|                            | 105 | DIAS           | other behavior         | DOG is considered to be very impulsive                                                                   | Impulsive                    | quantitative    | Agree to disagree                                                                                                                                                                                                       | 14,037      |                                                                |
|                            | 106 | DPQ            | other behavior         | DOG is curious                                                                                           | Curious                      | quantitative    | Agree to disagree                                                                                                                                                                                                       | 14,059      |                                                                |
|                            | 107 | DPQ            | other behavior         | DOG is affectionate                                                                                      | Affectionate                 | quantitative    | Agree to disagree                                                                                                                                                                                                       | 14,079      |                                                                |
|                            | 108 | DPQ            | other behavior         | DOG tends to be calm                                                                                     | Calm                         | quantitative    | Agree to disagree                                                                                                                                                                                                       | 14,047      |                                                                |
|                            | 109 | DPQ            | other behavior         | DOG is aloof                                                                                             | Aloof                        | quantitative    | Agree to disagree                                                                                                                                                                                                       | 14,069      |                                                                |
|                            | 110 | CHQLS          | other behavior         | DOG has more good days than bad days                                                                     | More good days               | quantitative    | Agree to disagree                                                                                                                                                                                                       | 13,679      |                                                                |
| Physical Traits            | 121 | physical trait | physical trait         | When DOG is standing next to someone of average height, how high are HIS shoulders?                      | Size                         | quantitative    | ankle high or shorter   calf high   knee high   thigh high   hip high or higher                                                                                                                                         | 16,286      | size                                                           |
|                            | 122 | physical trait | physical trait         | What color is DOG? Select all that apply.                                                                | Fur color                    | multiple choice | white   red (from pale peach to dark red or liver colored)   yellow (from pale cream to orange, gold, fawn, or wheaten)   gray (slate, blue gray, charcoal, or silver)   chocolate brown   pure black   merle   brindle | 16,579      | pigmentation                                                   |
|                            | 123 | physical trait | physical trait         | How much white fur does DOG have? Select the image with the closest amount of white.                     | White fur                    | quantitative    | image options ( <i>see figure S3A</i> )                                                                                                                                                                                 | 16,436      | pigmentation                                                   |
|                            | 124 | physical trait | physical trait         | Is DOG's tail curly?                                                                                     | Curly tail                   | binary          | no   yes   I don't know                                                                                                                                                                                                 | 16,081      | tail shape                                                     |
|                            | 125 | physical trait | physical trait         | What is DOG's ear shape? Select the image with the closest ear shape.                                    | Ear shape                    | categorical     | image options ( <i>see figure S3B</i> )                                                                                                                                                                                 | 16,105      | ear shape                                                      |
|                            | 126 | physical trait | physical trait         | Are DOG's eyes different colors?                                                                         | Eyes different colors        | binary          | no   yes   I don't know                                                                                                                                                                                                 | 15,993      | pigmentation                                                   |
|                            | 127 | physical trait | physical trait         | How long is DOG's fur on HIS back and sides? Measure it against your finger.                             | Fur length                   | quantitative    | short   medium   long   I'm not sure                                                                                                                                                                                    | 16,117      | fur type                                                       |
|                            | 128 | physical trait | physical trait         | Does DOG have soft fur or rough and bristly fur?                                                         | Fur texture                  | binary          | soft   rough (wiry)   I'm not sure                                                                                                                                                                                      | 15,632      | fur type                                                       |

\* Agree to Disagree: Strongly Agree | Agree | Neither Agree Nor Disagree | Disagree | Strongly Disagree

**Table S2.** Breed information, stereotypes, and reference panel.

| Table 52: Breed information, stereotypes, and reference panel. |                               |                                          |                       |             |                       |         |            |                            |                                    |              |                       |             |                 |                      |                      |                      |                  |                  |                    |
|----------------------------------------------------------------|-------------------------------|------------------------------------------|-----------------------|-------------|-----------------------|---------|------------|----------------------------|------------------------------------|--------------|-----------------------|-------------|-----------------|----------------------|----------------------|----------------------|------------------|------------------|--------------------|
| Breed                                                          | AKC Registrations (2000-2015) | % candidate purebred dogs (Darwin's Ark) | Breed Reference Panel |             |                       |         |            | Encyclopedia of Dog Breeds |                                    |              |                       |             |                 |                      |                      |                      |                  |                  |                    |
|                                                                |                               |                                          | Illumina array        | Axiom array | Low pass + imputation | 30x WGS | Sources *  | AKC Group                  | AKC Three-word Descriptors         | energy level | exercise requirements | playfulness | affection level | friendliness towards | friendliness towards | friendliness towards | ease of training | watchdog ability | protection ability |
| labrador retriever                                             | 15.18%                        | 10.29%                                   | 0                     | 0           | 0                     | 12      | 1          | sporting                   | active, friendly, outgoing         | 4            | 3                     | 5           | 5               | 4                    | 5                    | 5                    | 5                | 4                | 2                  |
| german shepherd dog                                            | 5.95%                         | 4.86%                                    | 0                     | 0           | 0                     | 12      | 1          | herding                    | confident, courageous, smart       | 3            | 4                     | 2           | 3               | 1                    | 3                    | 2                    | 5                | 5                | 5                  |
| golden retriever                                               | 5.52%                         | 4.23%                                    | 0                     | 0           | 0                     | 12      | 1; 2       | sporting                   | devoted, friendly, intelligent     | 3            | 3                     | 5           | 5               | 5                    | 5                    | 5                    | 5                | 3                | 2                  |
| chihuahua                                                      | 2.54%                         | 4.08%                                    | 8                     | 0           | 1                     | 3       | 3; 1; 4    | toy                        | charming, graceful, sassy          | 5            | 1                     | 2           | 2               | 1                    | 3                    | 1                    | 2                | 5                | 1                  |
| american pit bull terrier                                      | #N/A                          | 3.93%                                    | 0                     | 0           | 12                    | 0       | 4          |                            |                                    |              |                       |             |                 |                      |                      |                      |                  |                  |                    |
| border collie                                                  | 0.33%                         | 3.68%                                    | 0                     | 0           | 5                     | 7       | 1; 4       | herding                    | affectionate, energetic, smart     | 5            | 5                     | 4           | 3               | 3                    | 1                    | 2                    | 5                | 4                | 3                  |
| australian shepherd                                            | 0.87%                         | 3.02%                                    | 3                     | 1           | 8                     | 0       | 3; 4       | herding                    | exuberant, smart, work-oriented    | 4            | 5                     | 5           | 4               | 3                    | 3                    | 2                    | 5                | 5                | 4                  |
| beagle                                                         | 4.80%                         | 2.59%                                    | 0                     | 5           | 2                     | 5       | 1; 4       | hound                      | curious, friendly, merry           | 3            | 3                     | 3           | 5               | 5                    | 5                    | 5                    | 1                | 4                | 1                  |
| dachshund                                                      | 3.85%                         | 2.57%                                    | 3                     | 1           | 3                     | 5       | 3; 1; 4    | hound                      | curious, friendly, spunky          | 4            | 2                     | 3           | 3               | 3                    | 2                    | 1                    | 2                | 5                | 2                  |
| poodle                                                         | 3.37%                         | 2.31%                                    | 10                    | 0           | 2                     | 0       | 3; 4       | non-sporting               | active, proud, very smart          | 3            | 4                     | 4           | 3               | 3                    | 4                    | 3                    | 5                | 5                | 4                  |
| jack russell terrier                                           | 0.14%                         | 2.27%                                    | 7                     | 0           | 2                     | 3       | 3; 1; 4    | terrier                    | alert, inquisitive, lively         | 5            | 4                     | 5           | 3               | 2                    | 1                    | 3                    | 3                | 5                | 2                  |
| australian cattle dog                                          | 0.20%                         | 2.18%                                    | 3                     | 2           | 4                     | 3       | 3; 1; 4    | herding                    | alert, curious, pleasant           | 5            | 5                     | 4           | 3               | 3                    | 2                    | 2                    | 5                | 5                | 4                  |
| boxer                                                          | 3.73%                         | 2.06%                                    | 10                    | 0           | 1                     | 1       | 3; 1; 4    | working                    | active, bright, fun-loving         | 4            | 3                     | 4           | 5               | 3                    | 3                    | 3                    | 3                | 3                | 3                  |
| siberian husky                                                 | 1.35%                         | 1.70%                                    | 8                     | 1           | 0                     | 3       | 3; 1; 4    | working                    | loyal, mischievous, outgoing       | 3            | 4                     | 4           | 4               | 3                    | 3                    | 5                    | 1                | 3                | 1                  |
| shih tzu                                                       | 2.80%                         | 1.53%                                    | 11                    | 0           | 1                     | 0       | 3; 4       | toy                        | affectionate, outgoing, playful    | 3            | 2                     | 4           | 4               | 4                    | 4                    | 4                    | 2                | 3                | 1                  |
| yorkshire terrier                                              | 4.74%                         | 1.44%                                    | 0                     | 0           | 1                     | 11      | 1; 4       |                            | affectionate, sprightly, tomboyish | 4            | 1                     | 4           | 3               | 2                    | 2                    | 3                    | 2                | 5                | 1                  |
| toy poodle                                                     | #N/A                          | 1.36%                                    | 10                    | 1           | 1                     | 0       | 3; 4       | toy                        | agile, intelligent, self-confident | 4            | 2                     | 5           | 4               | 3                    | 3                    | 4                    | 5                | 5                | 1                  |
| pug                                                            | 1.90%                         | 1.29%                                    | 7                     | 1           | 4                     | 0       | 3; 4       | toy                        | charming, loving, mischievous      | 3            | 2                     | 4           | 4               | 3                    | 3                    | 2                    | 3                | 5                | 1                  |
| miniature schnauzer                                            | 2.38%                         | 1.20%                                    | 10                    | 1           | 1                     | 0       | 3; 4       | terrier                    | friendly, obedient, smart          | 3            | 3                     | 4           | 4               | 3                    | 3                    | 3                    | 3                | 5                | 1                  |
| boston terrier                                                 | 1.57%                         | 1.01%                                    | 6                     | 5           | 0                     | 1       | 3; 1; 4    | non-sporting               | amusing, bright, friendly          | 3            | 1                     | 3           | 3               | 3                    | 4                    | 3                    | 3                | 5                | 1                  |
| pomeranian                                                     | 2.12%                         | 1.01%                                    | 9                     | 1           | 1                     | 1       | 3; 1; 4    | toy                        | bold, inquisitive, lively          | 4            | 1                     | 4           | 1               | 1                    | 3                    | 1                    | 1                | 5                | 1                  |
| pembroke welsh corgi                                           | 1.11%                         | 0.97%                                    | 9                     | 1           | 0                     | 2       | 3; 1; 4    | herding                    | affectionate, alert, smart         | 3            | 3                     | 3           | 4               | 3                    | 4                    | 4                    | 4                | 5                | 4                  |
| doberman pinscher                                              | 1.44%                         | 0.94%                                    | 8                     | 1           | 0                     | 3       | 3; 1; 4    | working                    | alert, fearless, loyal             | 4            | 3                     | 3           | 3               | 1                    | 3                    | 1                    | 5                | 5                | 5                  |
| shetland sheepdog                                              | 1.62%                         | 0.94%                                    | 2                     | 3           | 4                     | 3       | 3; 1; 4    | herding                    | bright, energetic, playful         | 3            | 3                     | 3           | 3               | 4                    | 4                    | 1                    | 5                | 5                | 1                  |
| cavalier king charles spaniel                                  | 0.86%                         | 0.87%                                    | 10                    | 0           | 2                     | 0       | 3; 4       | toy                        | affectionate, gentle, graceful     | 3            | 3                     | 4           | 5               | 1                    | 4                    | 5                    | 4                | 3                | 1                  |
| rottweiler                                                     | 2.26%                         | 0.87%                                    | 0                     | 0           | 2                     | 10      | 3; 1; 2    | working                    | confident guardian, loving, loyal  | 3            | 3                     | 2           | 2               | 1                    | 2                    | 1                    | 3                | 5                | 5                  |
| greyhound                                                      | 0.03%                         | 0.86%                                    | 0                     | 0           | 4                     | 8       | 1; 4       | hound                      | gentle, independent, noble         | 2            | 3                     | 3           | 3               | 3                    | 2                    | 3                    | 3                | 4                | 2                  |
| great pyrenees                                                 | 0.25%                         | 0.76%                                    | 9                     | 2           | 0                     | 1       | 3; 1; 4    | working                    | calm, patient, smart               | 1            | 3                     | 2           | 3               | 2                    | 3                    | 2                    | 1                | 5                | 4                  |
| collie                                                         | 0.61%                         | 0.75%                                    | 9                     | 3           | 0                     | 0       | 3; 4       | herding                    | devoted, graceful, proud           | 3            | 3                     | 3           | 3               | 3                    | 4                    | 3                    | 3                | 5                | 3                  |
| great dane                                                     | 1.19%                         | 0.75%                                    | 5                     | 0           | 3                     | 4       | 3; 1; 4    | working                    | dependable, friendly, patient      | 2            | 3                     | 2           | 4               | 3                    | 3                    | 4                    | 4                | 4                | 3                  |
| maltese                                                        | 1.37%                         | 0.72%                                    | 9                     | 1           | 2                     | 0       | 3; 4       | toy                        | charming, gentle, playful          | 4            | 1                     | 4           | 3               | 3                    | 3                    | 1                    | 3                | 5                | 1                  |
| staffordshire bull terrier                                     | 0.11%                         | 0.72%                                    | 12                    | 0           | 0                     | 0       | 3          | terrier                    | brave, clever, tenacious           | 3            | 3                     | 5           | 4               | 2                    | 3                    | 3                    | 3                | 3                | 3                  |
| shiba inu                                                      | 0.24%                         | 0.69%                                    | 3                     | 6           | 1                     | 2       | 3; 1; 4    | non-sporting               | active, alert, attentive           | 3            | 3                     | 3           | 3               | 2                    | 2                    | 3                    | 2                | 5                | 3                  |
| basset hound                                                   | 0.90%                         | 0.62%                                    | 9                     | 2           | 1                     | 0       | 3; 1; 4    | hound                      | charming, low-key, patient         | 2            | 2                     | 2           | 4               | 3                    | 3                    | 3                    | 2                | 4                | 1                  |
| german shorthaired pointer                                     | 1.49%                         | 0.48%                                    | 7                     | 5           | 0                     | 0       | 3; 1       | sporting                   | friendly, smart, willing to please | 5            | 5                     | 4           | 4               | 3                    | 2                    | 3                    | 3                | 5                | 3                  |
| american cocker spaniel                                        | 1.74%                         | 0.82%                                    | 4                     | 1           | 1                     | 6       | 3; 1; 4    | sporting                   | smart, happy, gentle               | 3            | 3                     | 4           | 5               | 5                    | 5                    | 4                    | 4                | 4                | 1                  |
| papillon                                                       | 0.56%                         | 0.64%                                    | 10                    | 1           | 1                     | 0       | 3; 4       |                            |                                    |              |                       |             |                 |                      |                      |                      |                  |                  |                    |
| bichon frise                                                   | 0.85%                         | 0.62%                                    | 12                    | 0           | 0                     | 0       | 3          |                            |                                    |              |                       |             |                 |                      |                      |                      |                  |                  |                    |
| french bulldog                                                 | 0.81%                         | 0.62%                                    | 8                     | 1           | 2                     | 2       | 3; 1; 4    |                            |                                    |              |                       |             |                 |                      |                      |                      |                  |                  |                    |
| havanese                                                       | 0.49%                         | 0.62%                                    | 9                     | 0           | 3                     | 0       | 3; 4       |                            |                                    |              |                       |             |                 |                      |                      |                      |                  |                  |                    |
| belgian malinois                                               | 0.12%                         | 0.55%                                    | 4                     | 1           | 1                     | 6       | 3; 1; 5; 4 |                            |                                    |              |                       |             |                 |                      |                      |                      |                  |                  |                    |
| vizsla                                                         | 0.43%                         | 0.54%                                    | 8                     | 3           | 1                     | 1       | 3; 1; 4    |                            |                                    |              |                       |             |                 |                      |                      |                      |                  |                  |                    |
| brittany                                                       | 0.87%                         | 0.53%                                    | 11                    | 0           | 1                     | 0       | 3; 4       |                            |                                    |              |                       |             |                 |                      |                      |                      |                  |                  |                    |
| bernese mountain dog                                           | 0.44%                         | 0.51%                                    | 7                     | 0           | 2                     | 3       | 3; 1; 4    |                            |                                    |              |                       |             |                 |                      |                      |                      |                  |                  |                    |
| english bulldog                                                | 2.73%                         | 0.51%                                    | 9                     | 1           | 1                     | 1       | 3; 1; 4    |                            |                                    |              |                       |             |                 |                      |                      |                      |                  |                  |                    |
| miniature pinscher                                             | 1.14%                         | 0.51%                                    | 11                    | 1           | 0                     | 0       | 3; 4       |                            |                                    |              |                       |             |                 |                      |                      |                      |                  |                  |                    |
| rhodesian ridgeback                                            | 0.31%                         | 0.51%                                    | 7                     | 0           | 1                     | 4       | 3; 1; 4    |                            |                                    |              |                       |             |                 |                      |                      |                      |                  |                  |                    |
| west highland white terrier                                    | 0.74%                         | 0.51%                                    | 0                     | 1           | 2                     | 9       | 1; 4       |                            |                                    |              |                       |             |                 |                      |                      |                      |                  |                  |                    |
| whippet                                                        | 0.22%                         | 0.46%                                    | 4                     | 6           | 1                     | 1       | 3; 1; 4    |                            |                                    |              |                       |             |                 |                      |                      |                      |                  |                  |                    |
| english springer spaniel                                       | 0.97%                         | 0.44%                                    | 10                    | 0           | 0                     | 2       | 3; 1       |                            |                                    |              |                       |             |                 |                      |                      |                      |                  |                  |                    |
| cairn terrier                                                  | 0.36%                         | 0.36%                                    | 11                    | 0           | 1                     | 0       | 3; 4       |                            |                                    |              |                       |             |                 |                      |                      |                      |                  |                  |                    |
| mastiff                                                        | 0.78%                         | 0.36%                                    | 10                    | 0           | 0                     | 2       | 3; 1       |                            |                                    |              |                       |             |                 |                      |                      |                      |                  |                  |                    |
| lhasa apso                                                     | 0.42%                         | 0.35%                                    | 12                    | 0           | 0                     | 0       | 3          |                            |                                    |              |                       |             |                 |                      |                      |                      |                  |                  |                    |
| alaskan malamute                                               | 0.26%                         | 0.33%                                    | 9                     | 0           | 1                     | 2       | 3; 1; 4    |                            |                                    |              |                       |             |                 |                      |                      |                      |                  |                  |                    |
| airedale terrier                                               | 0.29%                         | 0.31%                                    | 8                     | 0           | 1                     | 3       | 3; 1; 4    |                            |                                    |              |                       |             |                 |                      |                      |                      |                  |                  |                    |

| Breed                              | AKC Registrations (2000-2015) | % candidate purebred dogs (Darwin's Ark) | Breed Reference Panel |             |                       |         |           | Encyclopedia of Dog Breeds |                            |              |                       |             |                 |                      |                      |                      |                  |                  |                    |
|------------------------------------|-------------------------------|------------------------------------------|-----------------------|-------------|-----------------------|---------|-----------|----------------------------|----------------------------|--------------|-----------------------|-------------|-----------------|----------------------|----------------------|----------------------|------------------|------------------|--------------------|
|                                    |                               |                                          | Illumina array        | Axiom array | Low pass + imputation | 30x WGS | Sources * | AKC Group                  | AKC Three-word Descriptors | energy level | exercise requirements | playfulness | affection level | friendliness towards | friendliness towards | friendliness towards | ease of training | watchdog ability | protection ability |
| akita                              | 0.38%                         | 0.31%                                    | 11                    | 0           | 1                     | 0       | 3; 4      |                            |                            |              |                       |             |                 |                      |                      |                      |                  |                  |                    |
| weimaraner                         | 0.85%                         | 0.31%                                    | 11                    | 0           | 0                     | 1       | 3; 1      |                            |                            |              |                       |             |                 |                      |                      |                      |                  |                  |                    |
| chow chow                          | 0.22%                         | 0.30%                                    | 3                     | 7           | 1                     | 1       | 3; 1; 4   |                            |                            |              |                       |             |                 |                      |                      |                      |                  |                  |                    |
| dalmatian                          | 0.17%                         | 0.30%                                    | 10                    | 0           | 0                     | 2       | 3; 1      |                            |                            |              |                       |             |                 |                      |                      |                      |                  |                  |                    |
| portuguese water dog               | 0.19%                         | 0.30%                                    | 0                     | 2           | 2                     | 8       | 3; 1; 4   |                            |                            |              |                       |             |                 |                      |                      |                      |                  |                  |                    |
| newfoundland                       | 0.39%                         | 0.29%                                    | 11                    | 0           | 0                     | 1       | 3; 5      |                            |                            |              |                       |             |                 |                      |                      |                      |                  |                  |                    |
| italian greyhound                  | 0.24%                         | 0.26%                                    | 4                     | 6           | 0                     | 2       | 3; 1      |                            |                            |              |                       |             |                 |                      |                      |                      |                  |                  |                    |
| saint bernard                      | 0.47%                         | 0.26%                                    | 10                    | 0           | 0                     | 2       | 3; 1      |                            |                            |              |                       |             |                 |                      |                      |                      |                  |                  |                    |
| border terrier                     | 0.11%                         | 0.25%                                    | 8                     | 0           | 0                     | 4       | 3; 1      |                            |                            |              |                       |             |                 |                      |                      |                      |                  |                  |                    |
| nova scotia duck tolling retriever | 0.07%                         | 0.25%                                    | 11                    | 0           | 0                     | 1       | 3; 1      |                            |                            |              |                       |             |                 |                      |                      |                      |                  |                  |                    |
| bullmastiff                        | 0.40%                         | 0.24%                                    | 7                     | 2           | 2                     | 1       | 3; 1; 4   |                            |                            |              |                       |             |                 |                      |                      |                      |                  |                  |                    |
| english setter                     | 0.09%                         | 0.24%                                    | 7                     | 0           | 2                     | 3       | 3; 1; 4   |                            |                            |              |                       |             |                 |                      |                      |                      |                  |                  |                    |
| soft coated wheaten terrier        | 0.24%                         | 0.24%                                    | 9                     | 1           | 0                     | 2       | 3; 1; 4   |                            |                            |              |                       |             |                 |                      |                      |                      |                  |                  |                    |
| english cocker spaniel             | 0.17%                         | 0.23%                                    | 8                     | 0           | 0                     | 4       | 3; 1      |                            |                            |              |                       |             |                 |                      |                      |                      |                  |                  |                    |
| english shepherd                   | non-AKC                       | 0.22%                                    | 10                    | 0           | 2                     | 0       | 6; 4      |                            |                            |              |                       |             |                 |                      |                      |                      |                  |                  |                    |
| samoyed                            | 0.17%                         | 0.22%                                    | 10                    | 0           | 0                     | 2       | 3; 1      |                            |                            |              |                       |             |                 |                      |                      |                      |                  |                  |                    |
| shar pei                           | 0.41%                         | 0.22%                                    | 12                    | 0           | 0                     | 0       | 3         |                            |                            |              |                       |             |                 |                      |                      |                      |                  |                  |                    |
| tibetan terrier                    | 0.09%                         | 0.22%                                    | 1                     | 8           | 1                     | 2       | 3; 1; 4   |                            |                            |              |                       |             |                 |                      |                      |                      |                  |                  |                    |
| chinese crested                    | 0.24%                         | 0.20%                                    | 10                    | 0           | 0                     | 2       | 3; 1      |                            |                            |              |                       |             |                 |                      |                      |                      |                  |                  |                    |
| basenji                            | 0.12%                         | 0.19%                                    | 10                    | 0           | 0                     | 2       | 3; 1      |                            |                            |              |                       |             |                 |                      |                      |                      |                  |                  |                    |
| scottish terrier                   | 0.37%                         | 0.19%                                    | 8                     | 0           | 0                     | 4       | 3; 1      |                            |                            |              |                       |             |                 |                      |                      |                      |                  |                  |                    |
| irish setter                       | 0.18%                         | 0.18%                                    | 9                     | 2           | 0                     | 1       | 3; 1; 4   |                            |                            |              |                       |             |                 |                      |                      |                      |                  |                  |                    |
| bloodhound                         | 0.36%                         | 0.17%                                    | 3                     | 8           | 0                     | 1       | 3; 1; 4   |                            |                            |              |                       |             |                 |                      |                      |                      |                  |                  |                    |
| bull terrier                       | 0.21%                         | 0.17%                                    | 5                     | 0           | 0                     | 7       | 3; 1      |                            |                            |              |                       |             |                 |                      |                      |                      |                  |                  |                    |
| chesapeake bay retriever           | 0.40%                         | 0.17%                                    | 10                    | 0           | 1                     | 1       | 3; 1; 4   |                            |                            |              |                       |             |                 |                      |                      |                      |                  |                  |                    |
| irish wolfhound                    | 0.12%                         | 0.17%                                    | 3                     | 0           | 2                     | 7       | 3; 1; 4   |                            |                            |              |                       |             |                 |                      |                      |                      |                  |                  |                    |
| tibetan spaniel                    | 0.06%                         | 0.17%                                    | 12                    | 0           | 0                     | 0       | 3         |                            |                            |              |                       |             |                 |                      |                      |                      |                  |                  |                    |
| pekingese                          | 0.44%                         | 0.15%                                    | 11                    | 0           | 0                     | 1       | 3; 1      |                            |                            |              |                       |             |                 |                      |                      |                      |                  |                  |                    |
| borzoi                             | 0.09%                         | 0.14%                                    | 11                    | 0           | 0                     | 1       | 3; 1      |                            |                            |              |                       |             |                 |                      |                      |                      |                  |                  |                    |
| greater swiss mountain dog         | 0.09%                         | 0.14%                                    | 7                     | 3           | 1                     | 2       | 3; 1; 4   |                            |                            |              |                       |             |                 |                      |                      |                      |                  |                  |                    |
| leonberger                         | N/A                           | 0.14%                                    | 0                     | 0           | 0                     | 12      | 1; 2      |                            |                            |              |                       |             |                 |                      |                      |                      |                  |                  |                    |
| saluki                             | 0.04%                         | 0.14%                                    | 7                     | 1           | 1                     | 3       | 3; 1; 4   |                            |                            |              |                       |             |                 |                      |                      |                      |                  |                  |                    |
| bearded collie                     | N/A                           | 0.13%                                    | 0                     | 0           | 5                     | 7       | 1; 4      |                            |                            |              |                       |             |                 |                      |                      |                      |                  |                  |                    |
| afghan hound                       | 0.09%                         | 0.12%                                    | 10                    | 0           | 0                     | 2       | 3; 1      |                            |                            |              |                       |             |                 |                      |                      |                      |                  |                  |                    |
| norwegian elkhound                 | 0.09%                         | 0.11%                                    | 10                    | 0           | 0                     | 2       | 3; 1      |                            |                            |              |                       |             |                 |                      |                      |                      |                  |                  |                    |
| schipperke                         | 0.12%                         | 0.11%                                    | 12                    | 0           | 0                     | 0       | 3         |                            |                            |              |                       |             |                 |                      |                      |                      |                  |                  |                    |
| wire fox terrier                   | 0.12%                         | 0.11%                                    | 12                    | 0           | 0                     | 0       | 3         |                            |                            |              |                       |             |                 |                      |                      |                      |                  |                  |                    |
| old english sheepdog               | 0.16%                         | 0.10%                                    | 5                     | 6           | 1                     | 0       | 3; 1; 4   |                            |                            |              |                       |             |                 |                      |                      |                      |                  |                  |                    |
| belgian tervuren                   | 0.06%                         | 0.09%                                    | 2                     | 0           | 0                     | 10      | 3; 1      |                            |                            |              |                       |             |                 |                      |                      |                      |                  |                  |                    |
| chinook                            | N/A                           | 0.08%                                    | 9                     | 1           | 1                     | 1       | 3; 1; 4   |                            |                            |              |                       |             |                 |                      |                      |                      |                  |                  |                    |
| wirehaired pointing griffon        | 0.07%                         | 0.08%                                    | 11                    | 0           | 1                     | 0       | 3; 4      |                            |                            |              |                       |             |                 |                      |                      |                      |                  |                  |                    |
| tibetan mastiff                    | N/A                           | 0.07%                                    | 0                     | 1           | 0                     | 11      | 1; 4      |                            |                            |              |                       |             |                 |                      |                      |                      |                  |                  |                    |
| gordon setter                      | 0.09%                         | 0.04%                                    | 10                    | 0           | 0                     | 2       | 3; 1      |                            |                            |              |                       |             |                 |                      |                      |                      |                  |                  |                    |
| norfolk terrier                    | 0.04%                         | 0.04%                                    | 12                    | 0           | 0                     | 0       | 3         |                            |                            |              |                       |             |                 |                      |                      |                      |                  |                  |                    |
| finnish spitz                      | 0.01%                         | 0.03%                                    | 12                    | 0           | 0                     | 0       | 3         |                            |                            |              |                       |             |                 |                      |                      |                      |                  |                  |                    |
| entlebucher                        | N/A                           | N/A                                      | 0                     | 0           | 0                     | 12      | 7; 2      |                            |                            |              |                       |             |                 |                      |                      |                      |                  |                  |                    |

**Sources:**

- NHGRI Dog Genome Project (Elaine Ostrander)(40)
- Broad Institute (BioProject PRJNA683923)
- Cornell Canine Dataset (Hayward et al 2016, doi:10.1038/ncomms10460)(118)
- Darwin's Ark (BioProject PRJNA675863)
- BarkBase (Megquier et al 2019, doi:10.3390/genes10060433) (102)
- Embark Veterinary, Inc. (Darwin's Ark participant-submitted raw data)
- National Entlebucher Mountain Dog Association (BioProject PRJNA683923)

**Table S3.** Descriptive statistics for the exploratory factor analysis (110 items, 10,252 dogs).

| Statistic              | 1     | 2     | 3     | 4     | 5     | 6     | 7     | 8     | 9     | 10    |
|------------------------|-------|-------|-------|-------|-------|-------|-------|-------|-------|-------|
| Mean                   | 0     | 0     | 0     | 0     | 0     | 0     | 0     | 0     | 0     | 0     |
| Std Dev                | 0.94  | 0.91  | 0.89  | 0.89  | 0.87  | 0.92  | 0.84  | 0.87  | 0.82  | 0.86  |
| Range                  | 4.98  | 6.01  | 5.46  | 5.73  | 5.86  | 6.2   | 7.24  | 7.18  | 6.81  | 5.83  |
| Minimum                | -3.08 | -3.55 | -2.05 | -2.54 | -3.18 | -3.64 | -2.48 | -2.5  | -3.14 | -3.08 |
| Maximum                | 1.9   | 2.46  | 3.41  | 3.19  | 2.68  | 2.56  | 4.76  | 4.68  | 3.67  | 2.75  |
| 25% Percentile         | -0.58 | -0.6  | -0.68 | -0.63 | -0.54 | -0.56 | -0.59 | -0.6  | -0.55 | -0.57 |
| 50% Percentile         | 0.23  | 0.09  | -0.19 | -0.07 | 0.12  | 0.13  | -0.06 | -0.14 | 0.01  | 0.04  |
| 75% Percentile         | 0.74  | 0.67  | 0.5   | 0.59  | 0.64  | 0.68  | 0.53  | 0.49  | 0.56  | 0.6   |
| Sum of Squared Loading | 3.96  | 4.46  | 2.66  | 2.94  | 3.24  | 2.98  | 4.01  | 2.42  | 2.54  | 1.97  |
| Proportion Variance    | 0.04  | 0.04  | 0.02  | 0.03  | 0.03  | 0.03  | 0.04  | 0.02  | 0.02  | 0.02  |
| Cumulative Variance    | 0.04  | 0.08  | 0.1   | 0.13  | 0.16  | 0.18  | 0.22  | 0.24  | 0.27  | 0.28  |
|                        | 11    | 12    | 13    | 14    | 15    | 16    | 17    | 18    | 19    | 20    |
| Mean                   | 0     | 0     | 0     | 0     | 0     | 0     | 0     | 0     | 0     | 0     |
| Std Dev                | 0.78  | 0.78  | 0.78  | 0.76  | 0.82  | 0.75  | 0.73  | 0.72  | 0.71  | 0.75  |
| Range                  | 7.12  | 5.26  | 5.82  | 5.86  | 6.54  | 7.64  | 6.75  | 6.04  | 7.22  | 7.88  |
| Minimum                | -3.24 | -2.78 | -2.19 | -2.25 | -3.07 | -3.57 | -3.77 | -3.07 | -2.46 | -3.2  |
| Maximum                | 3.88  | 2.48  | 3.63  | 3.61  | 3.47  | 4.07  | 2.98  | 2.97  | 4.76  | 4.68  |
| 25% Percentile         | -0.5  | -0.54 | -0.54 | -0.54 | -0.56 | -0.5  | -0.49 | -0.48 | -0.49 | -0.48 |
| 50% Percentile         | 0.07  | 0.08  | -0.1  | -0.04 | -0.1  | -0.01 | -0.01 | -0.01 | -0.03 | 0.01  |
| 75% Percentile         | 0.57  | 0.58  | 0.41  | 0.51  | 0.46  | 0.48  | 0.47  | 0.48  | 0.46  | 0.47  |
| Sum of Squared Loading | 1.53  | 1.42  | 1.23  | 1.3   | 1.81  | 1.44  | 1.42  | 1.05  | 1.54  | 1.28  |
| Proportion Variance    | 0.01  | 0.01  | 0.01  | 0.01  | 0.02  | 0.01  | 0.01  | 0.01  | 0.01  | 0.01  |
| Cumulative Variance    | 0.3   | 0.31  | 0.32  | 0.33  | 0.35  | 0.36  | 0.38  | 0.39  | 0.4   | 0.41  |

**Table S4.** Factors discovered from Darwin's Ark survey data.

| Pattern                            | Structure | Question                                                                                                                   | Scale                               |
|------------------------------------|-----------|----------------------------------------------------------------------------------------------------------------------------|-------------------------------------|
| <b>Factor 1: Human Sociability</b> |           | { - less sociable -   + highly sociable + }                                                                                |                                     |
| 0.920                              | 0.820     | 46 Fearful to unfamiliar people                                                                                            | Strongly agree to strongly disagree |
| -0.857                             | -0.774    | 42 DOG is friendly towards unfamiliar people                                                                               | Strongly agree to strongly disagree |
| -0.632                             | -0.710    | 45 DOG is a people person                                                                                                  | Strongly agree to strongly disagree |
| 0.770                              | 0.709     | 12 DOG is shy                                                                                                              | Strongly agree to strongly disagree |
| 0.434                              | 0.569     | 41 DOG doesn't like to be approached or hugged                                                                             | Strongly agree to strongly disagree |
| 0.520                              | 0.530     | 48 DOG behaves aggressively towards unfamiliar people                                                                      | Strongly agree to strongly disagree |
| -0.527                             | -0.524    | 50 DOG must greet everyone who comes to the door                                                                           | Strongly agree to strongly disagree |
| NA                                 | 0.471     | 84 DOG is not keen to go into new situations                                                                               | Strongly agree to strongly disagree |
| NA                                 | -0.451    | 81 DOG is very interested in and adapts easily to new things and new places                                                | Strongly agree to strongly disagree |
| NA                                 | -0.432    | 49 DOG seeks companionship from people                                                                                     | Strongly agree to strongly disagree |
| NA                                 | -0.414    | 102 DOG is confident                                                                                                       | Strongly agree to strongly disagree |
| NA                                 | 0.385     | 44 DOG behaves aggressively in response to perceived threats from people (e.g., being cornered, having collar reached for) | Strongly agree to strongly disagree |
| NA                                 | -0.358    | 37 DOG walks away or avoids being patted                                                                                   | Never to always                     |
| NA                                 | 0.358     | 88 DOG behaves fearfully during visits to the veterinarian                                                                 | Strongly agree to strongly disagree |
| NA                                 | 0.345     | 104 DOG is anxious                                                                                                         | Strongly agree to strongly disagree |
| NA                                 | -0.336    | 11 DOG is relaxed when greeting people                                                                                     | Strongly agree to strongly disagree |
| NA                                 | 0.312     | 82 DOG exhibits fearful behaviors when HE is restrained                                                                    | Strongly agree to strongly disagree |
| <b>Factor 2: Arousal Level</b>     |           | { - aroused -   + composed + }                                                                                             |                                     |
| -0.759                             | -0.707    | 108 DOG tends to be calm                                                                                                   | Strongly agree to strongly disagree |
| 0.742                              | 0.668     | 105 DOG is considered to be very impulsive                                                                                 | Strongly agree to strongly disagree |
| 0.684                              | 0.596     | 14 DOG does not think before HE acts                                                                                       | Strongly agree to strongly disagree |
| -0.579                             | -0.587    | 8 DOG calms down very quickly after being excited                                                                          | Strongly agree to strongly disagree |
| 0.544                              | 0.551     | 47 DOG seems to get excited for no reason                                                                                  | Strongly agree to strongly disagree |
| 0.543                              | 0.533     | 13 DOG is boisterous                                                                                                       | Strongly agree to strongly disagree |
| 0.561                              | 0.531     | 10 DOG is not very patient                                                                                                 | Strongly agree to strongly disagree |
| 0.446                              | 0.507     | 6 DOG seeks constant activity                                                                                              | Strongly agree to strongly disagree |
| -0.513                             | -0.449    | 55 DOG appears to have a lot of control over how HE responds                                                               | Strongly agree to strongly disagree |
| 0.410                              | 0.435     | 27 DOG shows extreme physical signs when excited                                                                           | Strongly agree to strongly disagree |
| -0.383                             | -0.398    | 11 DOG is relaxed when greeting people                                                                                     | Strongly agree to strongly disagree |
| 0.301                              | 0.385     | 7 Excitement can lead DOG to fixed repetitive behavior                                                                     | Strongly agree to strongly disagree |
| NA                                 | 0.330     | 104 DOG is anxious                                                                                                         | Strongly agree to strongly disagree |
| NA                                 | 0.329     | 93 DOG paces up and down, walks in circles and/or wanders with no direction or purpose                                     | Strongly agree to strongly disagree |
| NA                                 | -0.303    | 21 DOG is able to focus on a task in a distracting situation (e.g., loud or busy places, around other dogs)                | Strongly agree to strongly disagree |
| NA                                 | 0.303     | 3 DOG becomes aggressive when excited                                                                                      | Strongly agree to strongly disagree |

| Pattern                                      | Structure | Question                                                                                                                   | Scale                               |
|----------------------------------------------|-----------|----------------------------------------------------------------------------------------------------------------------------|-------------------------------------|
| <b>Factor 3: Toy-directed Motor Patterns</b> |           | { - <b>MPs toy-directed</b> -   + <b>MPs not toy-directed</b> + }                                                          |                                     |
| 0.943                                        | 0.773     | 4 DOG enjoys playing with toys                                                                                             | Strongly agree to strongly disagree |
| 0.751                                        | 0.721     | 2 DOG wants to play                                                                                                        | Strongly agree to strongly disagree |
| 0.719                                        | 0.651     | 54 DOG retrieves objects (e.g., balls, toys, sticks)                                                                       | Strongly agree to strongly disagree |
| -0.554                                       | -0.544    | 5 DOG gets bored in play quickly                                                                                           | Strongly agree to strongly disagree |
| NA                                           | 0.374     | 6 DOG seeks constant activity                                                                                              | Strongly agree to strongly disagree |
| NA                                           | -0.317    | 33 DOG sleeps more, is less awake                                                                                          | Strongly agree to strongly disagree |
| NA                                           | -0.316    | 101 DOG is lethargic                                                                                                       | Strongly agree to strongly disagree |
| NA                                           | 0.308     | 1 DOG enjoys life                                                                                                          | Strongly agree to strongly disagree |
| NA                                           | 0.305     | 89 DOG takes a long time to lose interest in new things                                                                    | Strongly agree to strongly disagree |
| <b>Factor 4: Biddability</b>                 |           | { - <b>biddable</b> -   + <b>independent</b> + }                                                                           |                                     |
| -0.778                                       | -0.707    | 31 DOG ignores commands                                                                                                    | Strongly agree to strongly disagree |
| 0.675                                        | 0.639     | 23 When off leash, DOG comes immediately when called                                                                       | Strongly agree to strongly disagree |
| 0.613                                        | 0.622     | 57 DOG is easy to train                                                                                                    | Strongly agree to strongly disagree |
| -0.612                                       | -0.597    | 34 DOG is slow to respond to corrections                                                                                   | Strongly agree to strongly disagree |
| 0.463                                        | 0.508     | 53 DOG leaves food or objects alone when told to do so                                                                     | Strongly agree to strongly disagree |
| -0.467                                       | -0.485    | 32 DOG is quick to sneak out through open doors, gates                                                                     | Strongly agree to strongly disagree |
| 0.360                                        | 0.422     | 21 DOG is able to focus on a task in a distracting situation (e.g., loud or busy places, around other dogs)                | Strongly agree to strongly disagree |
| NA                                           | 0.315     | 55 DOG appears to have a lot of control over how HE responds                                                               | Strongly agree to strongly disagree |
| <b>Factor 5: Agonistic Threshold</b>         |           | { - <b>assertive</b> -   + <b>diffident</b> + }                                                                            |                                     |
| 0.944                                        | 0.682     | 9 DOG may become aggressive if HE is frustrated with something                                                             | Strongly agree to strongly disagree |
| 0.619                                        | 0.606     | 87 DOG shows aggression when nervous or fearful                                                                            | Strongly agree to strongly disagree |
| 0.750                                        | 0.581     | 3 DOG becomes aggressive when excited                                                                                      | Strongly agree to strongly disagree |
| 0.550                                        | 0.551     | 44 DOG behaves aggressively in response to perceived threats from people (e.g., being cornered, having collar reached for) | Strongly agree to strongly disagree |
| 0.431                                        | 0.497     | 48 DOG behaves aggressively towards unfamiliar people                                                                      | Strongly agree to strongly disagree |
| 0.521                                        | 0.454     | 16 DOG aggressively guards coveted items (e.g., stolen item, treats, food bowl)                                            | Strongly agree to strongly disagree |
| 0.331                                        | 0.428     | 85 DOG behaves aggressively during visits to the veterinarian                                                              | Strongly agree to strongly disagree |
| NA                                           | 0.382     | 71 DOG behaves aggressively toward other dogs                                                                              | Strongly agree to strongly disagree |
| -0.383                                       | -0.373    | 38 DOG shows barrier aggression                                                                                            | Never to always                     |
| <b>Factor 6: Dog Sociability</b>             |           | { - <b>less sociable</b> -   + <b>highly sociable</b> + }                                                                  |                                     |
| -0.914                                       | -0.792    | 75 DOG is friendly towards other dogs                                                                                      | Strongly agree to strongly disagree |
| -0.847                                       | -0.742    | 22 DOG is playful with other dogs                                                                                          | Strongly agree to strongly disagree |
| 0.724                                        | 0.654     | 74 DOG avoids other dogs                                                                                                   | Strongly agree to strongly disagree |
| 0.591                                        | 0.563     | 71 DOG behaves aggressively toward other dogs                                                                              | Strongly agree to strongly disagree |
| 0.513                                        | 0.521     | 77 DOG behaves fearfully towards other dogs                                                                                | Strongly agree to strongly disagree |
| -0.318                                       | -0.337    | 72 DOG willingly shares HIS toys with other dogs                                                                           | Strongly agree to strongly disagree |

| Pattern                                   | Structure | Question                                                                               | Scale                               |
|-------------------------------------------|-----------|----------------------------------------------------------------------------------------|-------------------------------------|
| <b>Factor 7: Environmental Engagement</b> |           | { - <b>high engagement</b> -   + <b>low engagement</b> + }                             |                                     |
| -0.734                                    | -0.467    | 101 DOG is lethargic                                                                   | Strongly agree to strongly disagree |
| -0.692                                    | -0.461    | 103 DOG seems dull or depressed, not alert                                             | Strongly agree to strongly disagree |
| 0.490                                     | 0.427     | 56 DOG reacts very quickly                                                             | Strongly agree to strongly disagree |
| 0.456                                     | 0.403     | 61 DOG has difficulty finding food dropped on the floor                                | Never to always                     |
| 0.423                                     | 0.373     | 36 DOG gets stuck behind objects and is unable to get around                           | Never to always                     |
| 0.480                                     | 0.369     | 95 DOG stares blankly at the walls or floor                                            | Never to always                     |
| 0.493                                     | 0.345     | 39 DOG lays in one place all day long                                                  | Never to always                     |
| 0.407                                     | 0.342     | 58 DOG can be very persistent                                                          | Strongly agree to strongly disagree |
| 0.342                                     | 0.335     | 106 DOG is curious                                                                     | Strongly agree to strongly disagree |
| -0.336                                    | -0.320    | 93 DOG paces up and down, walks in circles and/or wanders with no direction or purpose | Strongly agree to strongly disagree |
| -0.486                                    | -0.315    | 33 DOG sleeps more, is less awake                                                      | Strongly agree to strongly disagree |
| -0.347                                    | NA        | 94 DOG pants frequently, even at rest                                                  | Strongly agree to strongly disagree |
| 0.310                                     | NA        | 25 DOG moves normally                                                                  | Strongly agree to strongly disagree |
| <b>Factor 8: Proximity Seeking</b>        |           | { - <b>affectionate</b> -   + <b>aloof</b> + }                                         |                                     |
| 0.732                                     | 0.646     | 107 DOG is affectionate                                                                | Strongly agree to strongly disagree |
| 0.668                                     | 0.584     | 49 DOG seeks companionship from people                                                 | Strongly agree to strongly disagree |
| 0.539                                     | 0.499     | 37 DOG walks away or avoids being patted                                               | Never to always                     |
| -0.458                                    | -0.439    | 109 DOG is aloof                                                                       | Strongly agree to strongly disagree |
| 0.446                                     | 0.424     | 45 DOG is a people person                                                              | Strongly agree to strongly disagree |
| -0.423                                    | -0.409    | 41 DOG doesn't like to be approached or hugged                                         | Strongly agree to strongly disagree |
| 0.337                                     | 0.326     | 43 DOG responds to my presence                                                         | Strongly agree to strongly disagree |

**Table S5.** Biallelic SNPs unique to sampled breed populations.

| Population                  | random N | all SNPs | autosomal | X      |
|-----------------------------|----------|----------|-----------|--------|
| mutt                        | 10       | 375,474  | 361,663   | 13,811 |
| belgian tervuren            | 10       | 19,018   | 18,165    | 853    |
| border collie               | 10       | 51,279   | 48,421    | 2,858  |
| entlebucher                 | 10       | 27,627   | 26,465    | 1,162  |
| german shepherd dog         | 10       | 21,211   | 19,127    | 2,084  |
| golden retriever            | 10       | 35,055   | 33,513    | 1,542  |
| greyhound                   | 10       | 46,073   | 43,535    | 2,538  |
| labrador retriever          | 10       | 43,346   | 41,462    | 1,884  |
| leonberger                  | 10       | 36,611   | 34,972    | 1,639  |
| portuguese water dog        | 10       | 40,372   | 39,328    | 1,044  |
| rottweiler                  | 10       | 39,021   | 37,609    | 1,412  |
| tibetan mastiff             | 10       | 651,551  | 629,712   | 21,839 |
| west highland white terrier | 10       | 30,757   | 29,579    | 1,178  |
| yorkshire terrier           | 10       | 66,791   | 62,703    | 4,088  |
| breed mean:                 |          | 85,286   | 101,875   | 4,138  |
| breed SD:                   |          | 170,611  | 165,032   | 5,613  |

**Table S6.** Concordance of owner-reported breed with genetically inferred breed ancestry.

| Classification | Group               | Owner report                                                   | Reference breed | N    | Top breed at 85%+ | Breed matches top ancestry | Breed matches at 85%+ |
|----------------|---------------------|----------------------------------------------------------------|-----------------|------|-------------------|----------------------------|-----------------------|
| preliminary    | non-purebred        | 0 or 2 breeds                                                  | either          | 1186 | 55                | 402                        | 20                    |
| preliminary    | single breed        | 1 breed                                                        | present         | 880  | 517               | 752                        | 511                   |
|                |                     |                                                                | absent          | 89   | 12                | 0                          | 0                     |
| preliminary    | registered purebred | 1 breed & registered purebred                                  | present         | 304  | 272               | 299                        | 271                   |
|                |                     |                                                                | absent          | 19   | 2                 | 0                          | 0                     |
| final          | mutt                | 0 or 2 breeds, or <45% breed ancestry                          | either          | 1221 | 0                 | 382                        | 0                     |
| final          | candidate purebred  | 1 breed                                                        | either          | 934  | 584               | 772                        | 541                   |
|                |                     |                                                                | present         | 814  | 541               | 772                        | 531                   |
|                |                     |                                                                | absent          | 120  | 43                | 0                          | 0                     |
| final          | confirmed purebred  | 1 breed reported & registered purebred, or 85%+ breed ancestry | either          | 633  | 584               | 559                        | 531                   |
|                |                     |                                                                | present         | 573  | 541               | 559                        | 531                   |
|                |                     |                                                                | absent          | 60   | 43                | 0                          | 0                     |

**Table S7.** The correlation of population peculiarity scores among traits.

| Comparison                 | Confirmed Purebreds |        |          |        |        | Candidate Purebreds |       |          |        |        |
|----------------------------|---------------------|--------|----------|--------|--------|---------------------|-------|----------|--------|--------|
|                            | N                   | r      | p        | 5% CI  | 95% CI | N                   | r     | p        | 5% CI  | 95% CI |
| behavioral vs. physical    | 3,790               | 0.045  | 0.0059   | 0.013  | 0.076  | 46,202              | 0.064 | 1.20E-43 | 0.055  | 0.073  |
| behavioral trait questions | 27,137              | 0.055  | 2.30E-19 | 0.043  | 0.066  | 353,925             | 0.137 | 0        | 0.134  | 0.141  |
| physical trait questions   | 120                 | -0.101 | 0.275    | -0.275 | 0.08   | 1,296               | 0.018 | 0.528    | -0.037 | 0.072  |

**Table S8.** Validation of breed ancestry effects against PPS and breed standards.

| Breed Standard Trait | # breeds* | % correctly predicted | Counts (by predicted effect)      | Discordant Breed(s)  |
|----------------------|-----------|-----------------------|-----------------------------------|----------------------|
| size**               | 17        | 100%                  | 9 ankle high; 8 hip high; 1 other |                      |
| white                | 3         | 100%                  | 3 all white                       |                      |
| ear shape            | 22        | 96%                   | 14 dropped; 8 pricked             | jack russell terrier |
| fur length           | 9         | 100%                  | 6 long; 3 short                   |                      |
| all                  | 51        | 98%                   |                                   |                      |

\* breeds that are significant in LMER analysis

\*\* bull terrier excluded because it comes in two sizes (miniature and standard), and LMER model predicted bull terrier ancestry contributes to smaller size.

**Table S9.** Breed propensities inferred only from the effects of breed ancestry in mutts.

| Index | Class             | Trait                           | Breed                    | Phenotype Direction | N  | REML t | ML anova <i>p</i> -value (FDR adjusted) |
|-------|-------------------|---------------------------------|--------------------------|---------------------|----|--------|-----------------------------------------|
| 110   | behavior question | Q110: More good days            | akita                    | disagree            | 24 | 4.77   | 6.88E-05                                |
| 3     | behavior factor   | F3: Toy-directed Motor Patterns | shar pei                 | not toy-directed    | 93 | 4.57   | 1.61E-04                                |
| 40    | behavior question | Q40: Damages doors              | chesapeake bay retriever | always              | 17 | 4.15   | 0.0011                                  |
| 8     | behavior factor   | F8: Proximity Seeking           | saint bernard            | affectionate        | 54 | -4.11  | 0.0016                                  |
| 52    | behavior question | Q52: Works at tasks             | shar pei                 | disagree            | 28 | 3.89   | 0.0039                                  |
| 40    | behavior question | Q40: Damages doors              | shar pei                 | always              | 27 | 3.66   | 0.0059                                  |
| 2     | behavior question | Q2: Wants to play               | shar pei                 | disagree            | 28 | 3.78   | 0.0064                                  |
| 125   | physical trait    | Q125: Ear shape                 | bloodhound               | dropped             | 62 | -3.04  | 0.0100                                  |
| 17    | behavior question | Q17: Howls                      | bloodhound               | always              | 63 | 3.60   | 0.0109                                  |
| 121   | physical trait    | Q121: Size                      | mastiff                  | hip high            | 10 | 2.82   | 0.0160                                  |
| 31    | behavior question | Q31: Ignores commands           | shar pei                 | agree               | 27 | -3.23  | 0.0204                                  |
| 35    | behavior question | Q35: Escapes from enclosures    | chesapeake bay retriever | always              | 17 | 3.46   | 0.0233                                  |
| 26    | behavior question | Q26: As active as has been      | english cocker spaniel   | disagree            | 25 | 3.20   | 0.0319                                  |
| 127   | physical trait    | Q127: Fur length                | old english sheepdog     | long                | 29 | 2.90   | 0.0374                                  |
| 127   | physical trait    | Q127: Fur length                | samoyed                  | long                | 28 | 2.72   | 0.0462                                  |
| 127   | physical trait    | Q127: Fur length                | irish setter             | long                | 18 | 2.64   | 0.0462                                  |

**Table S10.** Replication of physical trait associations found in literature for dogs and other animals.

| Table S16: Replication of physical trait associations found in literature for dogs and other animals. |                         |                               |                   |                       |                           |                                           |                                 |            |                 |                      |                  |                          |
|-------------------------------------------------------------------------------------------------------|-------------------------|-------------------------------|-------------------|-----------------------|---------------------------|-------------------------------------------|---------------------------------|------------|-----------------|----------------------|------------------|--------------------------|
|                                                                                                       | Gene                    | Species                       | Published Trait   | Published Association | Published <i>p</i> -value | Published effect size                     | DOI / Reference                 | GWAS Trait | GWAS Peak       | GWAS <i>p</i> -value | GWAS effect size | Replicated canine locus? |
| FGF4                                                                                                  | retrograde insertion to | <i>Canis lupus familiaris</i> | chondro-dysplasia | 18:2031083-20742377   | 1.90E-111                 | N/A                                       | 10.1126/science.1173275 (67)    | Q121 Size  | 18:20423056:A:G | 1.20E-26             | -0.39            | TRUE                     |
| FGF4                                                                                                  | retrograde insertion to | <i>Canis lupus familiaris</i> | chondro-dysplasia | 12:32413668-43115518  | <5.00E-02                 | N/A                                       | 10.1073/pnas.1709082114 (70)    | Q121 Size  | 12:33887652:G:A | 2.18E-08             | -0.14            | TRUE                     |
| HMG2                                                                                                  |                         | <i>Canis lupus familiaris</i> | stature           | 10:8454499            | 7.06E-09                  | N/A                                       | 10.1101/gr.157339.113 (69)      | Q121 Size  | 10:8356059:G:T  | 1.80E-24             | -0.31            | TRUE                     |
|                                                                                                       |                         | <i>Homo sapiens</i>           | stature           |                       |                           | 10.1038/ng2121 (138)                      |                                 |            |                 |                      |                  |                          |
| SMAD2                                                                                                 |                         | <i>Canis lupus familiaris</i> | stature           | 7:43865905            | 1.05E-06                  | N/A                                       |                                 | Q121 Size  | 7:43868045:C:T  | 3.82E-09             | -0.14            | TRUE                     |
| GHR                                                                                                   |                         | <i>Canis lupus familiaris</i> | stature           | 4:39200720,4:67026055 | 9.10E-09, 2.58E-07        | N/A                                       | 10.1101/gr.157339.113 (69)      | Q121 Size  | 4:67040898:C:T  | 2.80E-10             | -0.15            | TRUE                     |
| LCORL                                                                                                 |                         | <i>Canis lupus familiaris</i> | stature           | 3:91269525            | 4.04E-23                  | N/A                                       | 10.1038/s41467-019-09373-w (40) | Q121 Size  | 3:91108467:T:C  | 2.00E-18             | 0.29             | TRUE                     |
|                                                                                                       |                         | <i>Homo sapiens</i>           | stature           |                       |                           | 10.1371/journal.pgen.10004 09 (139)       |                                 |            |                 |                      |                  |                          |
|                                                                                                       |                         | <i>Equus caballus</i>         | stature           |                       |                           | 10.1371/journal.pone.00564 97 (140)       |                                 |            |                 |                      |                  |                          |
|                                                                                                       |                         | <i>Equus caballus</i>         | stature           |                       |                           | 10.1111/age.12031 10.1111/age.12031 (141) |                                 |            |                 |                      |                  |                          |
|                                                                                                       |                         | <i>Bos taurus</i>             | stature           |                       |                           | 10.1534/genetics.110.12394 3 (142)        |                                 |            |                 |                      |                  |                          |
|                                                                                                       |                         | <i>Bos taurus</i>             | stature           |                       |                           | 10.1038/s41588-018-0056-5 (143)           |                                 |            |                 |                      |                  |                          |
| IGF1                                                                                                  |                         | <i>Canis lupus familiaris</i> | stature           | 15:40446920-40447659  | 5.90 E-05                 | N/A                                       | 10.1073/pnas.152333099 (64)     | Q121 Size  | 15:41274602:G:T | 2.00E-17             | 0.18             | TRUE                     |
|                                                                                                       |                         | <i>Canis lupus familiaris</i> | stature           | 15:34903589-34903860  | 2.80E-02                  | N/A                                       | 10.1101/gr.3712705 (65)         |            |                 |                      |                  |                          |
|                                                                                                       |                         | <i>Canis lupus familiaris</i> | stature           | 15:41221438           | 2.00E-16                  | N/A                                       | 10.1126/science.1137045 (66)    |            |                 |                      |                  |                          |
| IGF2BP2                                                                                               |                         | <i>Canis lupus familiaris</i> | stature           | 34:20097018-212633271 | 1.26E-11                  | N/A                                       | 10.1038/s41467-019-09373-w (40) | Q121 Size  | 34:18296868:C:T | 4.10E-09             | 0.12             | TRUE                     |
| SAR1B                                                                                                 |                         | <i>Homo sapiens</i>           | metabolism        |                       |                           |                                           | 10.1186/1750-1172-6-7 8 (72)    | Q121 Size  | 11:22737397:G:A | 1.30E-13             | 0.32             | FALSE                    |
|                                                                                                       |                         | <i>Mus musculus</i>           | metabolism        |                       |                           | 10.1186/1750-1172-6-7 8 (72)              |                                 |            |                 |                      |                  |                          |
| MED13L                                                                                                |                         | <i>Canis lupus familiaris</i> | stature           | 26:12796099-13004170  | 2.08E-11                  | N/A                                       | 10.1038/s41467-019-09373-w (40) | Q121 Size  | 26:12838979:C:A | 2.90E-37             | -0.78            | TRUE                     |
| ANAPC1                                                                                                |                         | <i>Homo sapiens</i>           | dwarfism          |                       |                           |                                           | 10.1016/j.ajhg.2019.06.011 (74) | Q121 Size  | 17:36295546:C:T | 4.10E-08             | 0.15             | FALSE                    |

| Gene   | Species                       | Published Trait        | Published Associaton                                       | Published <i>p</i> -value | Published effect size | DOI / Reference                     | GWAS Trait        | GWAS Peak       | GWAS <i>p</i> -value | GWAS effect size | Replicated canine locus? |
|--------|-------------------------------|------------------------|------------------------------------------------------------|---------------------------|-----------------------|-------------------------------------|-------------------|-----------------|----------------------|------------------|--------------------------|
| ICF1R  | <i>Canis lupus familiaris</i> | stature                | 3:41849479                                                 | 3.6E-25,<br>1.4E-38       | N/A                   | 10.1007/s00335-012-9417-z (68)      |                   |                 |                      |                  |                          |
|        | <i>Homo sapiens</i>           | stature                |                                                            |                           |                       | 10.1159/000437324 (144)             | Q121 Size (Tiny)  | 3:42107672:A:G  | 1.30E-13             | 0.07             | TRUE                     |
|        | <i>Mus musculus</i>           | metabolism             |                                                            |                           |                       | 10.1172/JCI142447 (145)             |                   |                 |                      |                  |                          |
| LRIG3  | <i>Caenorhabditis elegans</i> | BMP-mediated body size |                                                            |                           |                       | 10.1371/journal.pgen.1000963 (75)   | Q122 Merle coat   | 10:2677840:A:G  | 3.10E-08             | -0.16            | FALSE                    |
| ITGA11 | <i>Ovis aries</i>             | birth weight           |                                                            |                           |                       | 10.3389/fgene.2020.00588 (146)      | Q121 Size (Giant) | 30:32302089:C:T | 7.80E-13             | 0.09             | FALSE                    |
| MITF   | <i>Canis lupus familiaris</i> | white spotting         | 20:21836232-21836429                                       | N/A                       | N/A                   | 10.1093/jhered/esp029 (147)         |                   |                 |                      |                  |                          |
|        |                               | white spotting         | 20:21839331-21839366                                       | N/A                       | N/A                   | 10.1038/ng.2007.10 (14)             |                   |                 |                      |                  |                          |
|        |                               | coat color             | 20:21786368-21869849                                       | 5.99E-29                  | N/A                   | 10.1038/s41467-019-09373-w (40)     |                   |                 |                      |                  |                          |
|        |                               | white spotting         |                                                            | N/A                       | N/A                   | 10.1371/journal.pone.0104363 (148)  | Q123 White fur    | 20:21827323:C:T | 2.90E-37             | -0.78            | TRUE                     |
|        | <i>Bos taurus</i>             | white spotting         |                                                            |                           |                       | 10.1111/age.12751 (149)             |                   |                 |                      |                  |                          |
|        | <i>Canis lupus familiaris</i> | pigmentation           |                                                            |                           |                       | 10.1080/00071668.2017.1379053 (150) |                   |                 |                      |                  |                          |
| MSRB3  | <i>Canis lupus familiaris</i> | ear shape              | 10:8041973, 10:8053461, 10:8068217, 10:8087164, 10:8090498 | < 1.00E-45                | 0.6464                | 10.1186/s12864-015-1702-2 (71)      |                   |                 |                      |                  |                          |
|        | <i>Ovis aries</i>             | ear shape              |                                                            |                           |                       | 10.1111/age.12994 (151)             | Q125 Ear shape    | 10:8027948:C:T  | 1.40E-27             | 0.10             | TRUE                     |
|        | <i>Sus scrofa domestica</i>   | ear shape              |                                                            |                           |                       | 10.1186/s12711-018-0442-6 (152)     |                   |                 |                      |                  |                          |

| Gene                                    | Species                       | Published Trait        | Published Associaton                                       | Published <i>p</i> -value | Published effect size | DOI / Reference                        | GWAS Trait                  | GWAS Peak       | GWAS <i>p</i> -value | GWAS effect size | Replicated canine locus? |
|-----------------------------------------|-------------------------------|------------------------|------------------------------------------------------------|---------------------------|-----------------------|----------------------------------------|-----------------------------|-----------------|----------------------|------------------|--------------------------|
| LEMD3                                   | <i>Sus scrofa domestica</i>   | ear shape              |                                                            |                           |                       | 10.1371/journal.pone.0102085 (153)     | Q125 Ear shape              | 10:8027948:C:T  | 6.00E-23             | -0.33            | FALSE                    |
|                                         |                               | ear shape              |                                                            |                           |                       | 10.1016/S2095-3119(15)61173-X (154)    |                             |                 |                      |                  |                          |
| FGF5                                    | <i>Canis lupus familiaris</i> | coat length            | 32:4509367                                                 | 3.08E-66                  | N/A                   | 10.1111/j.1365-2052.2006.01448.x (155) | Q127 Fur length             | 32:4509367:G:T  | 5.50E-54             | 0.37             | TRUE                     |
|                                         |                               | coat length            | 32:4528617-4528633, 32:4528621-4528621, 32:4528639-4528639 | N/A                       | N/A                   | 10.1111/age.12010 (156)                |                             |                 |                      |                  |                          |
|                                         |                               | coat length            | 32:7473337                                                 | 1.00E-157                 | N/A                   | 10.1126/science.1177808 (58)           |                             |                 |                      |                  |                          |
|                                         | <i>Felis catus</i>            | coat length            |                                                            |                           |                       | 10.1111/j.1365-2052.2007.01590.x (157) |                             |                 |                      |                  |                          |
| RSP02                                   | <i>Canis lupus familiaris</i> | wire coat/furnishings  | 13:8568727-8694401                                         | 4.00E-292                 | N/A                   | 10.1126/science.1177808 (58)           | Q128 Fur texture            | 13:8491477:A:C  | 3.40E-13             | 0.27             | TRUE                     |
|                                         |                               | "Improper coat" in PWD | 13:8610419                                                 | N/A                       | N/A                   | 10.1093/jhered/esq068 (158)            |                             |                 |                      |                  |                          |
| USH2A                                   | <i>Canis lupus familiaris</i> | ticking                | 38:11122467 and 38:11124294                                | 1.70E-05                  | N/A                   | 10.1111/age.13040 (59)                 | Q122 Ticking (piebald-only) | 38:11165134:G:A | 5.31E-16             | 0.20             | TRUE                     |
|                                         |                               | ticking                | 38:11085443                                                | 3.6E-08                   | N/A                   | 10.1371/journal.pone.0248233 (159)     |                             |                 |                      |                  |                          |
| CBDI03                                  | <i>Canis lupus familiaris</i> | brindle                | 16:43818953-57246829                                       | N/A                       | N/A                   | 10.1534/genetics.107.074237 (63)       | Q122 Brindle coat           | 16:59013740:G:A | #####                | 0.43             | TRUE                     |
|                                         |                               | brindle                | 16:58965448-58965450                                       | < 1.00E-06                | N/A                   | 10.1126/science.1147880 (61)           |                             |                 |                      |                  |                          |
|                                         |                               | brindle                | 16:58965448-58965450                                       | N/A                       | N/A                   | 10.1292/jvms.10-0439 (62)              |                             |                 |                      |                  |                          |
| SILV/PN1EL retrogene insertion to CFA10 | <i>Canis lupus familiaris</i> | merle                  | 10:292851                                                  |                           |                       | 10.1073/pnas.0506940103 (160)          | Q122 Merle coat             | 10:371299:T:G   | 6.40E-09             | 0.12             | TRUE                     |
|                                         |                               | merle                  |                                                            |                           |                       | 10.1159/000491408 (161)                |                             |                 |                      |                  |                          |
|                                         |                               | merle                  |                                                            |                           |                       | 10.1556/004.2019.018 (162)             |                             |                 |                      |                  |                          |

| Gene  | Species                       | Published Trait | Published Associaton             | Published <i>p</i> -value | Published effect size | DOI / Reference                   | GWAS Trait                  | GWAS Peak       | GWAS <i>p</i> -value | GWAS effect size | Replicated canine locus? |
|-------|-------------------------------|-----------------|----------------------------------|---------------------------|-----------------------|-----------------------------------|-----------------------------|-----------------|----------------------|------------------|--------------------------|
| FOXP1 | <i>Homo sapiens</i>           | vitiligo        |                                  |                           |                       | 10.1038/ng.602 (163)              | Q122 Ticking (piebald-only) | 20:20888915:A:G | 3.10E-09             | 0.23             | FALSE                    |
|       | <i>Mus musculus</i>           | hair loss       |                                  |                           |                       | 10.1242/dev.097477 (164)          |                             |                 |                      |                  |                          |
| RUNX3 | <i>Canis lupus familiaris</i> | red intensity   | 2:74746906                       | 1.48E-154                 | 0.95                  | 10.1371/journal.pone.0250579 (60) | Q122 Red intensity          | 2:74851797:T:C  | 2.00E-08             | 0.12             | TRUE                     |
|       | <i>Homo sapiens</i>           | gray hairs      |                                  |                           |                       | 10.3892/etm.2019.7663 (165)       |                             |                 |                      |                  |                          |
| TYRP1 | <i>Canis lupus familiaris</i> | liver           | 0.4 Mb from 11:34516748-34517020 | N/A                       | N/A                   | 10.1186/1746-6148-1-1 (166)       | Q122 Liver coat             | 11:33326685:C:T | 5.30E-16             | 0.20             | TRUE                     |
|       |                               | liver           | 11:33326719-33326719             | 1.08E-19                  | N/A                   | 10.1111/age.12839 (167)           |                             |                 |                      |                  |                          |
|       |                               | liver           | 11:33317810                      | N/A                       | N/A                   | 10.1111/age.12337 (168)           |                             |                 |                      |                  |                          |
|       | <i>Equus caballus</i>         | liver           |                                  |                           |                       | 10.1007/s003350020017 (169)       |                             |                 |                      |                  |                          |

**Table S11.** Correlation of age-related questions in Darwin's Ark and the Canine Cognitive Dysfunction Rating scale.

| Pearson correlation of PPS with year of age (8 yr +)                         |         |      |          | Spearman correlation of "% dogs that frequently perform behavior" with age |            |             |           |             |                    |        |
|------------------------------------------------------------------------------|---------|------|----------|----------------------------------------------------------------------------|------------|-------------|-----------|-------------|--------------------|--------|
| Darwin's Ark:                                                                |         |      |          | Salvin et al 2011 (35):                                                    |            |             |           |             | Direction of score | Match? |
| Question                                                                     | # years | r    | p        | Question from CCDR                                                         | 8-10 years | 10-12 years | >12 years | Correlation |                    |        |
| #2 DOG wants to play (agree-disagree)                                        | 7       | 0.96 | 7.50E-04 | Time spent playing                                                         | 96%        | 95%         | 88%       | -1          | opposite           | TRUE   |
| #25 DOG moves normally (agree-disagree)                                      | 7       | 0.99 | 4.00E-05 | Abnormal locomotion                                                        | 13%        | 21%         | 39%       | 1           | same               | TRUE   |
| #36 DOG gets stuck behind objects and is unable to get around (never-always) | 7       | 0.77 | 0.044    | Gets stuck behind objects                                                  | 10%        | 11%         | 22%       | 1           | same               | TRUE   |
| #39 DOG lays in one place all day long (never-always)                        | 7       | 0.97 | 4.20E-04 | Time spent active                                                          | 52%        | 44%         | 29%       | -1          | opposite           | TRUE   |
| #61 DOG has difficulty finding food dropped on the floor (never-always)      | 7       | 0.97 | 3.20E-04 | Difficulty finding dropped food                                            | 21%        | 26%         | 51%       | 1           | same               | TRUE   |
| #95 DOG stares blankly at the walls or floor (never-always)                  | 6       | 0.77 | 0.072    | Stares blankly                                                             | 10%        | 11%         | 22%       | 1           | same               | TRUE   |

**Table S12.** Correlation of age-related questions in Darwin's Ark and Canine Health-related and Quality of Life Survey.

| Darwin's Ark:<br>Pearson correlation of PPS with year of age    |    |          |       | Lavan et al<br>2013 (36) |
|-----------------------------------------------------------------|----|----------|-------|--------------------------|
| Question                                                        | N  | p        | r     | p*                       |
| Q1 DOG enjoys life<br>(agree-disagree)                          | 15 | 4.60E-07 | 0.93  | 0.063                    |
| Q2 DOG wants to play<br>(agree-disagree)                        | 15 | 2.51E-09 | 0.97  | 0.0001                   |
| Q25 DOG moves normally<br>(agree-disagree)                      | 15 | 1.35E-07 | 0.94  | 0.0001                   |
| Q26 DOG is as active as HE has been<br>(agree-disagree)         | 15 | 4.74E-09 | 0.97  | 0.0001                   |
| Q33 DOG sleeps more, is less awake<br>(agree-disagree)          | 15 | 4.20E-10 | -0.98 | 0.0001                   |
| Q39 DOG lays in one place all day long<br>(never-always)        | 15 | 6.46E-07 | 0.93  | 0.024                    |
| Q43 DOG responds to my presence<br>(agree-disagree)             | 15 | 8.43E-04 | 0.77  | 0.007                    |
| Q94 DOG pants frequently, even at rest<br>(agree-disagree)      | 15 | 3.71E-05 | -0.86 | 0.016                    |
| Q97 DOG shakes or trembles occasionally<br>(agree-disagree)     | 14 | 2.69E-07 | -0.95 | 0.135                    |
| Q103 DOG seems dull or depressed, not alert<br>(agree-disagree) | 14 | 3.50E-09 | -0.97 | 0.002                    |
| Q110 DOG has more good days than bad days<br>(agree-disagree)   | 14 | 4.42E-05 | 0.87  | 0.033                    |
| Spearman's rank correlation rho=                                |    |          |       | 0.633                    |
| Spearman's rank correlation p=                                  |    |          |       | 0.037                    |

\* p from Kruskal–Wallis one-way ANOVA; this is the only statistical metric reported in Lavan et al 2013

**Table S13.** Set of SNPs with MAF>0.025 in each population randomly sampled.

| Population          | All        | Illumina array SNPs | Axiom array SNPs | Low-coverage sequencing SNPs |
|---------------------|------------|---------------------|------------------|------------------------------|
| wolves              | 18,216,839 | 133,193             | 678,689          | 7,944,474                    |
| village dogs        | 12,710,126 | 152,094             | 758,076          | 8,719,223                    |
| mutts               | 12,491,157 | 160,666             | 779,353          | 9,076,003                    |
| yorkshire terriers  | 8,983,416  | 141,619             | 646,509          | 7,140,504                    |
| labrador retrievers | 8,407,324  | 137,550             | 619,205          | 6,806,734                    |
| golden retrievers   | 8,348,982  | 136,917             | 615,892          | 6,760,319                    |
| leonbergers         | 7,135,029  | 120,717             | 523,873          | 5,689,553                    |

**Table S14.** Population peculiarity score datasets. Variable numbers of dogs available for random sampling has a small effect on the magnitude of PPS z scores in the candidate breed analysis.

| Set type           | median # sets |                 | # dogs per sample | # dogs available for sampling per set (range) | Effect of # dogs available for sampling on abs(z) scores (ANOVA) |       |      |          |
|--------------------|---------------|-----------------|-------------------|-----------------------------------------------|------------------------------------------------------------------|-------|------|----------|
|                    | # tests       | / trait (range) |                   |                                               | ges                                                              | DFd   | F    | p        |
| year of age        | 1,375         | 11              | 100               | 639 - 1814                                    | 1.00E-03                                                         | 1,249 | 1.25 | 0.26     |
| candidate          | 7,478         | 60 (51 - 62)    | 25                | 25 - 905                                      | 0.028                                                            | 7,356 | 208  | 1.50E-46 |
| purebred           | 4,708         | 37 (28 - 44)    | 25                | 50 - 905                                      | 0.013                                                            | 4,587 | 59.2 | 1.70E-14 |
| confirmed purebred | 604           | 5 (3 - 6)       | 50                | 100 - 316                                     | 0.01                                                             | 498   | 4.8  | 0.028    |

ANOVA model: anova\_test(abs(z) ~ ndogs\_available+trait\_id)

**Table S15.** Expected vs. observed rates of correct guesses in Mutt Mix.

| ID   |          |        | User guesses 2 breeds |       |           |         | User guesses 3 breeds |       |            |         |           |          |     |  |
|------|----------|--------|-----------------------|-------|-----------|---------|-----------------------|-------|------------|---------|-----------|----------|-----|--|
|      |          |        | 1+ correct            |       | 2 correct |         | 1+ correct            |       | 2+ correct |         | 3 correct |          |     |  |
|      |          |        | exp                   | obs   | exp       | obs     | exp                   | obs   | exp        | obs     | exp       | obs      | obs |  |
| 1009 | Bailey   | 14,160 | 0.178                 | 0.959 | 0.00541   | 0.16695 | 0.26                  | 0.957 | 0.01606    | 0.31511 | 1.60E-04  | 1.30E-02 |     |  |
| 1010 | Bella    | 14,117 | 0.169                 | 0.881 | 0.00505   | 0.02006 | 0.247                 | 0.892 | 0.01505    | 0.24285 | 1.50E-04  | 4.00E-03 |     |  |
| 1011 | Beskow   | 13,696 | 0.281                 | 0.194 | 0.00949   | 0.00494 | 0.395                 | 0.316 | 0.02711    | 0.01761 | 9.20E-05  | 0.00E+00 |     |  |
| 1012 | Boone    | 13,975 | 0.167                 | 0.872 | 0.00429   | 0.23839 | 0.244                 | 0.922 | 0.01281    | 0.44669 | 7.50E-05  | 3.80E-03 |     |  |
| 1013 | Buddy    | 14,060 | 0.197                 | 0.975 | 0.00681   | 0.02922 | 0.286                 | 0.964 | 0.0201     | 0.06796 | 2.20E-04  | 4.80E-04 |     |  |
| 1014 | Clarence | 13,969 | 0.362                 | 0.726 | 0.02428   | 0.18354 | 0.496                 | 0.865 | 0.06671    | 0.41076 | 1.20E-03  | 6.00E-02 |     |  |
| 1015 | Cooper   | 13,903 | 0.232                 | 0.949 | 0.00864   | 0.37128 | 0.333                 | 0.941 | 0.02519    | 0.53381 | 2.10E-04  | 9.40E-02 |     |  |
| 1016 | Dug      | 13,662 | 0.351                 | 0.774 | 0.02281   | 0.03458 | 0.483                 | 0.79  | 0.06298    | 0.07397 | 1.30E-03  | 3.60E-04 |     |  |
| 1017 | Esme     | 13,737 | 0.329                 | 0.729 | 0.01835   | 0.12847 | 0.455                 | 0.798 | 0.05122    | 0.24978 | 9.00E-04  | 2.50E-03 |     |  |
| 1019 | Hershey  | 13,944 | 0.231                 | 0.805 | 0.00968   | 0.20193 | 0.332                 | 0.851 | 0.02821    | 0.37112 | 3.90E-04  | 4.30E-02 |     |  |
| 1020 | Hopper   | 14,044 | 0.254                 | 0.604 | 0.01171   | 0.00517 | 0.362                 | 0.668 | 0.03381    | 0.01203 | 5.10E-04  | 0.00E+00 |     |  |
| 1021 | Jack1    | 14,041 | 0.1                   | 0.211 | 0.00165   | 0       | 0.149                 | 0.351 | 0.00503    | 0.00795 | 2.70E-05  | 0.00E+00 |     |  |
| 1022 | Jack2    | 13,781 | 0.319                 | 0.213 | 0.01649   | 0.00284 | 0.443                 | 0.358 | 0.04622    | 0.02047 | 7.30E-04  | 8.30E-05 |     |  |
| 1023 | Kaylee   | 14,102 | 0.223                 | 0.963 | 0.00923   | 0.27557 | 0.32                  | 0.958 | 0.02696    | 0.3417  | 3.80E-04  | 9.90E-04 |     |  |
| 1024 | Lilly    | 14,036 | 0.227                 | 0.958 | 0.00963   | 0.57413 | 0.326                 | 0.955 | 0.02811    | 0.62244 | 4.10E-04  | 3.20E-02 |     |  |
| 1025 | Lola     | 14,006 | 0.054                 | 0.772 | 0.00047   | 0.14896 | 0.082                 | 0.852 | 0.00146    | 0.32036 | 3.90E-06  | 1.70E-02 |     |  |
| 1026 | Lucy     | 13,984 | 0.148                 | 0.028 | 0.00358   | 0       | 0.218                 | 0.112 | 0.01074    | 0.00167 | 8.00E-05  | 0.00E+00 |     |  |
| 1027 | Luna     | 13,931 | 0.192                 | 0.595 | 0.00644   | 0.00315 | 0.279                 | 0.67  | 0.01903    | 0.02794 | 2.00E-04  | 0.00E+00 |     |  |
| 1028 | Maxine   | 13,941 | 0.285                 | 0.206 | 0.01572   | 0.0288  | 0.402                 | 0.309 | 0.04481    | 0.06574 | 8.40E-04  | 3.50E-03 |     |  |
| 1030 | Peso     | 14,024 | 0.221                 | 0.987 | 0.00757   | 0.0691  | 0.317                 | 0.966 | 0.02217    | 0.13451 | 1.80E-04  | 3.00E-03 |     |  |
| 1031 | Ramy     | 13,848 | 0.348                 | 0.069 | 0.02199   | 0.00292 | 0.479                 | 0.141 | 0.06082    | 0.00636 | 1.20E-03  | 1.70E-04 |     |  |
| 1033 | Rex      | 13,870 | 0.273                 | 0.766 | 0.01398   | 0.18317 | 0.386                 | 0.806 | 0.04007    | 0.29694 | 6.80E-04  | 1.60E-02 |     |  |
| 1034 | Rosie    | 14,113 | 0.379                 | 0.323 | 0.02816   | 0.00114 | 0.516                 | 0.573 | 0.07671    | 0.09173 | 1.80E-03  | 4.00E-04 |     |  |
| 1037 | Sadie    | 13,990 | 0.206                 | 0.728 | 0.00769   | 0.08899 | 0.298                 | 0.864 | 0.02262    | 0.33852 | 2.80E-04  | 9.60E-03 |     |  |
| 1039 | Scotch   | 13,846 | 0.176                 | 0.044 | 0.00497   | 0.00051 | 0.256                 | 0.114 | 0.01478    | 0.00312 | 1.10E-04  | 0.00E+00 |     |  |
| 1042 | Zandy    | 14,058 | 0.192                 | 0.94  | 0.00671   | 0.34548 | 0.28                  | 0.936 | 0.01983    | 0.4682  | 2.30E-04  | 3.10E-02 |     |  |
| 1018 | Gus      | 13,854 | 0.214                 | 0.741 | 0.00628   | 0.01074 | 0.308                 | 0.731 | 0.01848    | 0.04687 |           |          |     |  |
| 1032 | Reilly   | 13,990 | 0.246                 | 0.102 | 0.00454   | 0       | 0.351                 | 0.194 | 0.01315    | 0.00218 |           |          |     |  |
| 1035 | Ruby     | 14,067 | 0.279                 | 0.372 | 0.00914   | 0.00147 | 0.394                 | 0.477 | 0.02614    | 0.00416 |           |          |     |  |
| 1036 | Rudy     | 13,783 | 0.269                 | 0.349 | 0.00767   | 0.01672 | 0.38                  | 0.458 | 0.02204    | 0.06807 |           |          |     |  |

## References and Notes

1. K. Lindblad-Toh, C. M. Wade, T. S. Mikkelsen, E. K. Karlsson, D. B. Jaffe, M. Kamal, M. Clamp, J. L. Chang, E. J. Kulbokas III, M. C. Zody, E. Mauceli, X. Xie, M. Breen, R. K. Wayne, E. A. Ostrander, C. P. Ponting, F. Galibert, D. R. Smith, P. J. DeJong, E. Kirkness, P. Alvarez, T. Biagi, W. Brockman, J. Butler, C.-W. Chin, A. Cook, J. Cuff, M. J. Daly, D. DeCaprio, S. Gnerre, M. Grabherr, M. Kellis, M. Kleber, C. Bardeleben, L. Goodstadt, A. Heger, C. Hitte, L. Kim, K.-P. Koepfli, H. G. Parker, J. P. Pollinger, S. M. J. Searle, N. B. Sutter, R. Thomas, C. Webber, J. Baldwin, A. Abebe, A. Abouelleil, L. Aftuck, M. Ait-Zahra, T. Aldredge, N. Allen, P. An, S. Anderson, C. Antoine, H. Arachchi, A. Aslam, L. Ayotte, P. Bachantsang, A. Barry, T. Bayul, M. Benamara, A. Berlin, D. Bessette, B. Blitshteyn, T. Bloom, J. Blye, L. Boguslavskiy, C. Bonnet, B. Boukhgalter, A. Brown, P. Cahill, N. Calixte, J. Camarata, Y. Cheshatsang, J. Chu, M. Citroen, A. Collymore, P. Cooke, T. Dawoe, R. Daza, K. Decktor, S. DeGray, N. Dhargay, K. Dooley, K. Dooley, P. Dorje, K. Dorjee, L. Dorris, N. Duffey, A. Dupes, O. Egbiremolen, R. Elong, J. Falk, A. Farina, S. Faro, D. Ferguson, P. Ferreira, S. Fisher, M. FitzGerald, K. Foley, C. Foley, A. Franke, D. Friedrich, D. Gage, M. Garber, G. Gearin, G. Giannoukos, T. Goode, A. Goyette, J. Graham, E. Grandbois, K. Gyaltsen, N. Hafez, D. Hagopian, B. Hagos, J. Hall, C. Healy, R. Hegarty, T. Honan, A. Horn, N. Houde, L. Hughes, L. Hunnicutt, M. Husby, B. Jester, C. Jones, A. Kamat, B. Kanga, C. Kells, D. Khazanovich, A. C. Kieu, P. Kisner, M. Kumar, K. Lance, T. Landers, M. Lara, W. Lee, J.-P. Leger, N. Lennon, L. Leuper, S. LeVine, J. Liu, X. Liu, Y. Lokyitsang, T. Lokyitsang, A. Lui, J. Macdonald, J. Major, R. Marabella, K. Maru, C. Matthews, S. McDonough, T. Mehta, J. Meldrim, A. Melnikov, L. Meneus, A. Mihalev, T. Mihova, K. Miller, R. Mittelman, V. Mlenga, L. Mulrain, G. Munson, A. Navidi, J. Naylor, T. Nguyen, N. Nguyen, C. Nguyen, T. Nguyen, R. Nicol, N. Norbu, C. Norbu, N. Novod, T. Nyima, P. Olandt, B. O'Neill, K. O'Neill, S. Osman, L. Oyono, C. Patti, D. Perrin, P. Phunkhang, F. Pierre, M. Priest, A. Rachupka, S. Raghuraman, R. Rameau, V. Ray, C. Raymond, F. Rege, C. Rise, J. Rogers, P. Rogov, J. Sahalie, S. Settipalli, T. Sharpe, T. Shea, M. Sheehan, N. Sherpa, J. Shi, D. Shih, J. Sloan, C. Smith, T. Sparrow, J. Stalker, N. Stange-Thomann, S. Stavropoulos, C. Stone, S. Stone, S. Sykes, P. Tchuinga, P. Tenzing, S. Tesfaye, D. Thoulutsang, Y. Thoulutsang, K. Topham, I. Topping, T. Tsamla, H. Vassiliev, V. Venkataraman, A. Vo, T. Wangchuk, T. Wangdi, M. Weiand, J. Wilkinson, A. Wilson, S. Yadav, S. Yang, X. Yang, G. Young, Q. Yu, J. Zainoun, L. Zembek, A. Zimmer, E. S. Lander, Genome sequence, comparative analysis and haplotype structure of the domestic dog. *Nature* **438**, 803–819 (2005). [doi:10.1038/nature04338](https://doi.org/10.1038/nature04338) [Medline](#)
2. A. Bergström, L. Frantz, R. Schmidt, E. Ermark, O. Lebrasseur, L. Girdland-Flink, A. T. Lin, J. Storå, K.-G. Sjögren, D. Anthony, E. Antipina, S. Amiri, G. Bar-Oz, V. I. Bazaliiskii, J. Bulatović, D. Brown, A. Carmagnini, T. Davy, S. Fedorov, I. Fiore, D. Fulton, M. Germonpré, J. Haile, E. K. Irving-Pease, A. Jamieson, L. Janssens, I. Kirillova, L. K. Horwitz, J. Kuzmanovic-Cvetković, Y. Kuzmin, R. J. Losey, D. L. Dizdar, M. Mashkour, M. Novak, V. Onar, D. Orton, M. Pasarić, M. Radivojević, D. Rajković, B. Roberts, H. Ryan, M. Sablin, F. Shidlovskiy, I. Stojanović, A. Tagliacozzo, K. Trantalidou, I. Ullén, A. Villaluenga, P. Wapnish, K. Dobney, A. Götherström, A. Linderholm, L. Dalén, R. Pinhasi, G. Larson, P. Skoglund, Origins and genetic legacy of prehistoric dogs. *Science* **370**, 557–564 (2020). [doi:10.1126/science.aba9572](https://doi.org/10.1126/science.aba9572) [Medline](#)

3. K. Lord, M. Feinstein, B. Smith, R. Coppinger, Variation in reproductive traits of members of the genus *Canis* with special attention to the domestic dog (*Canis familiaris*). *Behav. Processes* **92**, 131–142 (2013). [doi:10.1016/j.beproc.2012.10.009](https://doi.org/10.1016/j.beproc.2012.10.009) [Medline](#)
4. C. Hansen Wheat, W. van der Bijl, H. Temrin, Dogs, but not wolves, lose their sensitivity toward novelty with age. *Front. Psychol.* **10**, 2001 (2019). [doi:10.3389/fpsyg.2019.02001](https://doi.org/10.3389/fpsyg.2019.02001) [Medline](#)
5. L. Moretti, M. Hentrup, K. Kotrschal, F. Range, The influence of relationships on neophobia and exploration in wolves and dogs. *Anim. Behav.* **107**, 159–173 (2015). [doi:10.1016/j.anbehav.2015.06.008](https://doi.org/10.1016/j.anbehav.2015.06.008) [Medline](#)
6. M. Arendt, K. M. Cairns, J. W. O. Ballard, P. Savolainen, E. Axelsson, Diet adaptation in dog reflects spread of prehistoric agriculture. *Heredity* **117**, 301–306 (2016). [doi:10.1038/hdy.2016.48](https://doi.org/10.1038/hdy.2016.48) [Medline](#)
7. E. Axelsson, A. Ratnakumar, M.-L. Arendt, K. Maqbool, M. T. Webster, M. Perloski, O. Liberg, J. M. Arnemo, A. Hedhammar, K. Lindblad-Toh, The genomic signature of dog domestication reveals adaptation to a starch-rich diet. *Nature* **495**, 360–364 (2013). [doi:10.1038/nature11837](https://doi.org/10.1038/nature11837) [Medline](#)
8. J. de G. Mazzorin, A. Tagliacozzo, “Morphological and osteological changes in the dog from the Neolithic to the Roman period in Italy” in *Dogs Through Time: An Archaeological Perspective* (Archaeopress, 2000), pp. 141–161.
9. J. D. G. Mazzorin, A. Tagliacozzo, Dog remains in Italy from the Neolithic to the Roman period. *Anthropozoologica* **25**, 429 (1997).
10. M. Worboys, J.-M. Strange, N. Pemberton, *The Invention of the Modern Dog: Breed and Blood in Victorian Britain* (JHU Press, 2018).
11. H. Ritvo, Pride and pedigree: The evolution of the Victorian dog fancy. *Vic. Stud.* **29**, 227–253 (1986).
12. K. Lord, R. A. Schneider, R. Coppinger, in *The Domestic Dog: Its Evolution, Behavior and Interactions with People*, J. Serpell, Ed. (Cambridge Univ. Press, 2016), chap. 4, pp. 42–66.
13. C. D. Arons, W. J. Shoemaker, The distribution of catecholamines and  $\beta$ -endorphin in the brains of three behaviorally distinct breeds of dogs and their F1 hybrids. *Brain Res.* **594**, 31–39 (1992). [doi:10.1016/0006-8993\(92\)91026-B](https://doi.org/10.1016/0006-8993(92)91026-B) [Medline](#)
14. E. K. Karlsson, I. Baranowska, C. M. Wade, N. H. C. Salmon Hillbertz, M. C. Zody, N. Anderson, T. M. Biagi, N. Patterson, G. R. Pielberg, E. J. Kulbokas III, K. E. Comstock, E. T. Keller, J. P. Mesirov, H. von Euler, O. Kämpe, A. Hedhammar, E. S. Lander, G. Andersson, L. Andersson, K. Lindblad-Toh, Efficient mapping of mendelian traits in dogs through genome-wide association. *Nat. Genet.* **39**, 1321–1328 (2007). [doi:10.1038/ng.2007.10](https://doi.org/10.1038/ng.2007.10) [Medline](#)
15. E. K. Karlsson, K. Lindblad-Toh, Leader of the pack: Gene mapping in dogs and other model organisms. *Nat. Rev. Genet.* **9**, 713–725 (2008). [doi:10.1038/nrg2382](https://doi.org/10.1038/nrg2382) [Medline](#)
16. N. B. Sutter, E. A. Ostrander, Dog star rising: The canine genetic system. *Nat. Rev. Genet.* **5**, 900–910 (2004). [doi:10.1038/nrg1492](https://doi.org/10.1038/nrg1492) [Medline](#)

17. M. E. Gompper, Ed., *Free-Ranging Dogs and Wildlife Conservation* (Oxford Univ. Press, 2013).
18. American Veterinary Medical Association (AVMA), *United States Pet Ownership and Demographics Sourcebook* (AVMA, Veterinary Economics Division, 2018).
19. D. C. Coile, *Encyclopedia of Dog Breeds* (Barrons Educational Series, 1998).
20. American Kennel Club, *The New Complete Dog Book: Official Breed Standards and Profiles for Over 200 Breeds* (Fox Chapel Publishing, 2017).
21. J. P. Scott, J. L. Fuller, *Genetics and the Social Behavior of the Dog* (Univ. Chicago Press, 1965).
22. See the supplementary materials.
23. L. R. Mehrkam, C. D. L. Wynne, Behavioral differences among breeds of domestic dogs (*Canis lupus familiaris*): Current status of the science. *Appl. Anim. Behav. Sci.* **155**, 12–27 (2014). [doi:10.1016/j.applanim.2014.03.005](https://doi.org/10.1016/j.applanim.2014.03.005)
24. K. Svartberg, Breed-typical behaviour in dogs—Historical remnants or recent constructs? *Appl. Anim. Behav. Sci.* **96**, 293–313 (2006). [doi:10.1016/j.applanim.2005.06.014](https://doi.org/10.1016/j.applanim.2005.06.014)
25. H. J. Noh, R. Tang, J. Flannick, C. O’Dushlaine, R. Swofford, D. Howrigan, D. P. Genereux, J. Johnson, G. van Grootheest, E. Grünblatt, E. Andersson, D. R. Djurfeldt, P. D. Patel, M. Koltookian, C. M Hultman, M. T. Pato, C. N. Pato, S. A. Rasmussen, M. A. Jenike, G. L. Hanna, S. E. Stewart, J. A. Knowles, S. Ruhrmann, H.-J. Grabe, M. Wagner, C. Rück, C. A. Mathews, S. Walitza, D. C. Cath, G. Feng, E. K. Karlsson, K. Lindblad-Toh, Integrating evolutionary and regulatory information with a multispecies approach implicates genes and pathways in obsessive-compulsive disorder. *Nat. Commun.* **8**, 774 (2017). [doi:10.1038/s41467-017-00831-x](https://doi.org/10.1038/s41467-017-00831-x) [Medline](#)
26. N. H. Dodman, E. K. Karlsson, A. Moon-Fanelli, M. Galdzicka, M. Perloski, L. Shuster, K. Lindblad-Toh, E. I. Ginns, A canine chromosome 7 locus confers compulsive disorder susceptibility. *Mol. Psychiatry* **15**, 8–10 (2010). [doi:10.1038/mp.2009.111](https://doi.org/10.1038/mp.2009.111) [Medline](#)
27. K. L. Overall, Natural animal models of human psychiatric conditions: Assessment of mechanism and validity. *Prog. Neuropsychopharmacol. Biol. Psychiatry* **24**, 727–776 (2000). [doi:10.1016/S0278-5846\(00\)00104-4](https://doi.org/10.1016/S0278-5846(00)00104-4) [Medline](#)
28. R. Sarviaho, O. Hakosalo, K. Tiira, S. Sulkama, J. E. Niskanen, M. K. Hytönen, M. J. Sillanpää, H. Lohi, A novel genomic region on chromosome 11 associated with fearfulness in dogs. *Transl. Psychiatry* **10**, 169 (2020). [doi:10.1038/s41398-020-0849-z](https://doi.org/10.1038/s41398-020-0849-z) [Medline](#)
29. R. Sarviaho, O. Hakosalo, K. Tiira, S. Sulkama, E. Salmela, M. K. Hytönen, M. J. Sillanpää, H. Lohi, Two novel genomic regions associated with fearfulness in dogs overlap human neuropsychiatric loci. *Transl. Psychiatry* **9**, 18 (2019). [doi:10.1038/s41398-018-0361-x](https://doi.org/10.1038/s41398-018-0361-x) [Medline](#)
30. J. Iiska, M. J. Haskell, S. C. Blott, E. Sánchez-Molano, Z. Polgar, S. E. Lofgren, D. N. Clements, P. Wiener, Genetic characterization of dog personality traits. *Genetics* **206**, 1101–1111 (2017). [doi:10.1534/genetics.116.192674](https://doi.org/10.1534/genetics.116.192674) [Medline](#)

31. R. Tang, H. J. Noh, D. Wang, S. Sigurdsson, R. Swofford, M. Perloski, M. Duxbury, E. E. Patterson, J. Albright, M. Castelhamo, A. Auton, A. R. Boyko, G. Feng, K. Lindblad-Toh, E. K. Karlsson, Candidate genes and functional noncoding variants identified in a canine model of obsessive-compulsive disorder. *Genome Biol.* **15**, R25 (2014). [doi:10.1186/gb-2014-15-3-r25](https://doi.org/10.1186/gb-2014-15-3-r25) [Medline](#)
32. C. DeBoever, Y. Tanigawa, M. Aguirre, G. McInnes, A. Lavertu, M. A. Rivas, Assessing digital phenotyping to enhance genetic studies of human diseases. *Am. J. Hum. Genet.* **106**, 611–622 (2020). [doi:10.1016/j.ajhg.2020.03.007](https://doi.org/10.1016/j.ajhg.2020.03.007) [Medline](#)
33. C. L. Hyde, M. W. Nagle, C. Tian, X. Chen, S. A. Paciga, J. R. Wendland, J. Y. Tung, D. A. Hinds, R. H. Perlis, A. R. Winslow, Identification of 15 genetic loci associated with risk of major depression in individuals of European descent. *Nat. Genet.* **48**, 1031–1036 (2016). [doi:10.1038/ng.3623](https://doi.org/10.1038/ng.3623) [Medline](#)
34. H. F. Wright, D. S. Mills, P. Pollux, Development and validation of a psychometric tool for assessing impulsivity in the domestic dog, *Canis familiaris*. *Int. J. Comp. Psychol.* (2011). [doi:10.1016/j.physbeh.2011.09.019](https://doi.org/10.1016/j.physbeh.2011.09.019) [Medline](#)
35. H. E. Salvin, P. D. McGreevy, P. S. Sachdev, M. J. Valenzuela, The canine cognitive dysfunction rating scale (CCDR): A data-driven and ecologically relevant assessment tool. *Vet. J.* **188**, 331–336 (2011). [doi:10.1016/j.tvjl.2010.05.014](https://doi.org/10.1016/j.tvjl.2010.05.014) [Medline](#)
36. R. P. Lavan, Development and validation of a survey for quality of life assessment by owners of healthy dogs. *Vet. J.* **197**, 578–582 (2013). [doi:10.1016/j.tvjl.2013.03.021](https://doi.org/10.1016/j.tvjl.2013.03.021) [Medline](#)
37. A. C. Jones, *Development and Validation of a Dog Personality Questionnaire* (Univ. Texas, 2008).
38. N. B. Sutter, D. S. Mosher, M. M. Gray, E. A. Ostrander, Morphometrics within dog breeds are highly reproducible and dispute Rensch's rule. *Mamm. Genome* **19**, 713–723 (2008). [doi:10.1007/s00335-008-9153-6](https://doi.org/10.1007/s00335-008-9153-6) [Medline](#)
39. J. Yordy, C. Kraus, J. J. Hayward, M. E. White, L. M. Shannon, K. E. Creevy, D. E. L. Promislow, A. R. Boyko, Body size, inbreeding, and lifespan in domestic dogs. *Conserv. Genet.* **21**, 137–148 (2020). [doi:10.1007/s10592-019-01240-x](https://doi.org/10.1007/s10592-019-01240-x) [Medline](#)
40. J. Plassais, J. Kim, B. W. Davis, D. M. Karyadi, A. N. Hogan, A. C. Harris, B. Decker, H. G. Parker, E. A. Ostrander, Whole genome sequencing of canids reveals genomic regions under selection and variants influencing morphology. *Nat. Commun.* **10**, 1489 (2019). [doi:10.1038/s41467-019-09373-w](https://doi.org/10.1038/s41467-019-09373-w) [Medline](#)
41. H. G. Parker, D. L. Dreger, M. Rimbault, B. W. Davis, A. B. Mullen, G. Carpintero-Ramirez, E. A. Ostrander, Genomic analyses reveal the influence of geographic origin, migration, and hybridization on modern dog breed development. *Cell Rep.* **19**, 697–708 (2017). [doi:10.1016/j.celrep.2017.03.079](https://doi.org/10.1016/j.celrep.2017.03.079) [Medline](#)
42. A. R. Martin, E. G. Atkinson, S. B. Chapman, A. Stevenson, R. E. Stroud, T. Abebe, D. Akena, M. Alemayehu, F. K. Ashaba, L. Atwoli, T. Bowers, L. B. Chibnik, M. J. Daly, T. DeSmet, S. Dodge, A. Fekadu, S. Ferriera, B. Gelaye, S. Gichuru, W. E. Injera, R. James, S. M. Kariuki, G. Kigen, K. C. Koenen, E. Kwobah, J. Kyebuzibwa, L. Majara, H. Musinguzi, R. M. Mwema, B. M. Neale, C. P. Newman, C. R. J. C. Newton, J. K. Pickrell, R. Ramesar, W. Shiferaw, D. J. Stein, S. Teferra, C. van der Merwe, Z. Zingela, NeuroGAP-Psychosis Study Team, Low-coverage sequencing cost-effectively detects

- known and novel variation in underrepresented populations. *Am. J. Hum. Genet.* **108**, 656–668 (2021). [doi:10.1016/j.ajhg.2021.03.012](https://doi.org/10.1016/j.ajhg.2021.03.012) [Medline](#)
43. S. Rubinacci, D. M. Ribeiro, R. J. Hofmeister, O. Delaneau, Efficient phasing and imputation of low-coverage sequencing data using large reference panels. *Nat. Genet.* **53**, 120–126 (2021). [doi:10.1038/s41588-020-00756-0](https://doi.org/10.1038/s41588-020-00756-0) [Medline](#)
  44. R. M. Buckley, A. C. Harris, G.-D. Wang, D. Thad Whitaker, Y.-P. Zhang, E. A. Ostrander, Best practices for analyzing imputed genotypes from low-pass sequencing in dogs. *Mamm. Genome.* **33**, 213–229 (2022). [doi:10.1007/s00335-021-09914-z](https://doi.org/10.1007/s00335-021-09914-z) [Medline](#)
  45. J. H. Li, C. A. Mazur, T. Berisa, J. K. Pickrell, Low-pass sequencing increases the power of GWAS and decreases measurement error of polygenic risk scores compared to genotyping arrays. *Genome Res.* **31**, 529–537 (2021). [doi:10.1101/gr.266486.120](https://doi.org/10.1101/gr.266486.120) [Medline](#)
  46. K. Wasik, T. Berisa, J. K. Pickrell, J. H. Li, D. J. Fraser, K. King, C. Cox, Comparing low-pass sequencing and genotyping for trait mapping in pharmacogenetics. *BMC Genomics* **22**, 197 (2021). [doi:10.1186/s12864-021-07508-2](https://doi.org/10.1186/s12864-021-07508-2) [Medline](#)
  47. D. H. Alexander, K. Lange, Enhancements to the ADMIXTURE algorithm for individual ancestry estimation. *BMC Bioinformatics* **12**, 246 (2011). [doi:10.1186/1471-2105-12-246](https://doi.org/10.1186/1471-2105-12-246) [Medline](#)
  48. J. Yang, B. Benyamin, B. P. McEvoy, S. Gordon, A. K. Henders, D. R. Nyholt, P. A. Madden, A. C. Heath, N. G. Martin, G. W. Montgomery, M. E. Goddard, P. M. Visscher, Common SNPs explain a large proportion of the heritability for human height. *Nat. Genet.* **42**, 565–569 (2010). [doi:10.1038/ng.608](https://doi.org/10.1038/ng.608) [Medline](#)
  49. G. Athanasiadis, D. Speed, M. K. Andersen, E. V. R. Appel, N. Grarup, I. Brandslund, M. E. Jørgensen, C. V. L. Larsen, P. Bjerregaard, T. Hansen, A. Albrechtsen, Estimating narrow-sense heritability using family data from admixed populations. *Heredity* **124**, 751–762 (2020). [doi:10.1038/s41437-020-0311-2](https://doi.org/10.1038/s41437-020-0311-2) [Medline](#)
  50. S. Luo, E. V. Feofanova, A. Tin, S. Tung, E. P. Rhee, J. Coresh, D. E. Arking, A. Surapaneni, P. Schlosser, Y. Li, A. Köttgen, B. Yu, M. E. Grams, Genome-wide association study of serum metabolites in the African American Study of Kidney Disease and Hypertension. *Kidney Int.* **100**, 430–439 (2021). [doi:10.1016/j.kint.2021.03.026](https://doi.org/10.1016/j.kint.2021.03.026) [Medline](#)
  51. R. Bakeman, Recommended effect size statistics for repeated measures designs. *Behav. Res. Methods* **37**, 379–384 (2005). [doi:10.3758/BF03192707](https://doi.org/10.3758/BF03192707) [Medline](#)
  52. American Kennel Club, Dog breeds; <https://www.akc.org/dog-breeds/>.
  53. American Kennel Club, *The Complete Dog Book* (Ballantine Books, 2006).
  54. D. L. Wells, D. J. Morrison, P. G. Hepper, The effect of priming on perceptions of dog breed traits. *Anthrozoos* **25**, 369–377 (2012). [doi:10.2752/175303712X13403555186370](https://doi.org/10.2752/175303712X13403555186370)
  55. L. M. Gunter, R. T. Barber, C. D. L. Wynne, What's in a name? Effect of breed perceptions & labeling on attractiveness, adoptions & length of stay for pit-bull-type dogs. *PLOS ONE* **11**, e0146857 (2016). [doi:10.1371/journal.pone.0146857](https://doi.org/10.1371/journal.pone.0146857) [Medline](#)

56. J. Yang, S. H. Lee, M. E. Goddard, P. M. Visscher, GCTA: A tool for genome-wide complex trait analysis. *Am. J. Hum. Genet.* **88**, 76–82 (2011). [doi:10.1016/j.ajhg.2010.11.011](https://doi.org/10.1016/j.ajhg.2010.11.011) [Medline](#)
57. M. Pirinen, P. Donnelly, C. C. A. Spencer, Efficient computation with a linear mixed model on large-scale data sets with applications to genetic studies. *Ann. Appl. Stat.* **7**, 369–390 (2013). [doi:10.1214/12-AOAS586](https://doi.org/10.1214/12-AOAS586)
58. E. Cadieu, M. W. Neff, P. Quignon, K. Walsh, K. Chase, H. G. Parker, B. M. Vonholdt, A. Rhue, A. Boyko, A. Byers, A. Wong, D. S. Mosher, A. G. Elkahoun, T. C. Spady, C. André, K. G. Lark, M. Cargill, C. D. Bustamante, R. K. Wayne, E. A. Ostrander, Coat variation in the domestic dog is governed by variants in three genes. *Science* **326**, 150–153 (2009). [doi:10.1126/science.1177808](https://doi.org/10.1126/science.1177808) [Medline](#)
59. L. Brancalion, B. Haase, H. Mazrier, C. E. Willet, K. Lindblad-Toh, F. Lingaas, C. M. Wade, Roan, ticked and clear coat patterns in the canine are associated with three haplotypes near *usherin* on CFA38. *Anim. Genet.* **52**, 198–207 (2021). [doi:10.1111/age.13040](https://doi.org/10.1111/age.13040) [Medline](#)
60. A. J. Slavney, T. Kawakami, M. K. Jensen, T. C. Nelson, A. J. Sams, A. R. Boyko, Five genetic variants explain over 70% of hair coat pheomelanin intensity variation in purebred and mixed breed domestic dogs. *PLOS ONE* **16**, e0250579 (2021). [doi:10.1371/journal.pone.0250579](https://doi.org/10.1371/journal.pone.0250579) [Medline](#)
61. S. I. Candille, C. B. Kaelin, B. M. Cattanach, B. Yu, D. A. Thompson, M. A. Nix, J. A. Kerns, S. M. Schmutz, G. L. Millhauser, G. S. Barsh, A  $\beta$ -defensin mutation causes black coat color in domestic dogs. *Science* **318**, 1418–1423 (2007). [doi:10.1126/science.1147880](https://doi.org/10.1126/science.1147880) [Medline](#)
62. M. Oguro-Okano, M. Honda, K. Yamazaki, K. Okano, Mutations in the *melanocortin 1 receptor*,  *$\beta$ -defensin103* and *agouti signaling protein* genes, and their association with coat color phenotypes in Akita-inu dogs. *J. Vet. Med. Sci.* **73**, 853–858 (2011). [doi:10.1292/jvms.10-0439](https://doi.org/10.1292/jvms.10-0439) [Medline](#)
63. J. A. Kerns, E. J. Cargill, L. A. Clark, S. I. Candille, T. G. Berryere, M. Olivier, G. Lust, R. J. Todhunter, S. M. Schmutz, K. E. Murphy, G. S. Barsh, Linkage and segregation analysis of black and brindle coat color in domestic dogs. *Genetics* **176**, 1679–1689 (2007). [doi:10.1534/genetics.107.074237](https://doi.org/10.1534/genetics.107.074237) [Medline](#)
64. K. Chase, D. R. Carrier, F. R. Adler, T. Jarvik, E. A. Ostrander, T. D. Lorentzen, K. G. Lark, Genetic basis for systems of skeletal quantitative traits: Principal component analysis of the canid skeleton. *Proc. Natl. Acad. Sci. U.S.A.* **99**, 9930–9935 (2002). [doi:10.1073/pnas.152333099](https://doi.org/10.1073/pnas.152333099) [Medline](#)
65. K. Chase, D. R. Carrier, F. R. Adler, E. A. Ostrander, K. G. Lark, Interaction between the X chromosome and an autosome regulates size sexual dimorphism in Portuguese water dogs. *Genome Res.* **15**, 1820–1824 (2005). [doi:10.1101/gr.3712705](https://doi.org/10.1101/gr.3712705) [Medline](#)
66. N. B. Sutter, C. D. Bustamante, K. Chase, M. M. Gray, K. Zhao, L. Zhu, B. Padhukasahasram, E. Karlins, S. Davis, P. G. Jones, P. Quignon, G. S. Johnson, H. G. Parker, N. Fretwell, D. S. Mosher, D. F. Lawler, E. Satyaraj, M. Nordborg, K. G. Lark, R. K. Wayne, E. A. Ostrander, A single *IGF1* allele is a major determinant of small size in dogs. *Science* **316**, 112–115 (2007). [doi:10.1126/science.1137045](https://doi.org/10.1126/science.1137045) [Medline](#)

67. H. G. Parker, B. M. VonHoldt, P. Quignon, E. H. Margulies, S. Shao, D. S. Mosher, T. C. Spady, A. Elkahoul, M. Cargill, P. G. Jones, C. L. Maslen, G. M. Acland, N. B. Sutter, K. Kuroki, C. D. Bustamante, R. K. Wayne, E. A. Ostrander, An expressed *fgf4* retrogene is associated with breed-defining chondrodysplasia in domestic dogs. *Science* **325**, 995–998 (2009). [doi:10.1126/science.1173275](https://doi.org/10.1126/science.1173275) [Medline](#)
68. B. C. Hoopes, M. Rimbault, D. Liebers, E. A. Ostrander, N. B. Sutter, The insulin-like growth factor 1 receptor (IGF1R) contributes to reduced size in dogs. *Mamm. Genome* **23**, 780–790 (2012). [doi:10.1007/s00335-012-9417-z](https://doi.org/10.1007/s00335-012-9417-z) [Medline](#)
69. M. Rimbault, H. C. Beale, J. J. Schoenebeck, B. C. Hoopes, J. J. Allen, P. Kilroy-Glynn, R. K. Wayne, N. B. Sutter, E. A. Ostrander, Derived variants at six genes explain nearly half of size reduction in dog breeds. *Genome Res.* **23**, 1985–1995 (2013). [doi:10.1101/gr.157339.113](https://doi.org/10.1101/gr.157339.113) [Medline](#)
70. E. A. Brown, P. J. Dickinson, T. Mansour, B. K. Sturges, M. Aguilar, A. E. Young, C. Korff, J. Lind, C. L. Ettinger, S. Varon, R. Pollard, C. T. Brown, T. Raudsepp, D. L. Bannasch, *FGF4* retrogene on CFA12 is responsible for chondrodystrophy and intervertebral disc disease in dogs. *Proc. Natl. Acad. Sci. U.S.A.* **114**, 11476–11481 (2017). [doi:10.1073/pnas.1709082114](https://doi.org/10.1073/pnas.1709082114) [Medline](#)
71. M. T. Webster, N. Kamgari, M. Perloski, M. P. Hoepfner, E. Axelsson, Å. Hedhammar, G. Pielberg, K. Lindblad-Toh, Linked genetic variants on chromosome 10 control ear morphology and body mass among dog breeds. *BMC Genomics* **16**, 474 (2015). [doi:10.1186/s12864-015-1702-2](https://doi.org/10.1186/s12864-015-1702-2) [Medline](#)
72. T. Okada, M. Miyashita, J. Fukuhara, M. Sugitani, T. Ueno, M.-E. Samson-Bouma, L. P. Aggerbeck, Anderson's disease/chylomicron retention disease in a Japanese patient with uniparental disomy 7 and a normal *SAR1B* gene protein coding sequence. *Orphanet J. Rare Dis.* **6**, 78 (2011). [doi:10.1186/1750-1172-6-78](https://doi.org/10.1186/1750-1172-6-78) [Medline](#)
73. E. Levy, S. Spahis, C. Garofalo, V. Marcil, A. Montoudis, D. Sinnet, R. Sanchez, N. Peretti, J.-F. Beaulieu, A. Sane, Sar1b transgenic male mice are more susceptible to high-fat diet-induced obesity, insulin insensitivity and intestinal chylomicron overproduction. *J. Nutr. Biochem.* **25**, 540–548 (2014). [doi:10.1016/j.jnutbio.2014.01.004](https://doi.org/10.1016/j.jnutbio.2014.01.004) [Medline](#)
74. N. F. Ajeawung, T. T. M. Nguyen, L. Lu, T. J. Kucharski, J. Rousseau, S. Molidperree, J. Atienza, I. Gamache, W. Jin, S. E. Plon, B. H. Lee, J. G. Teodoro, L. L. Wang, P. M. Campeau, Mutations in *ANAPCI*, encoding a scaffold subunit of the anaphase-promoting complex, cause Rothmund-Thomson syndrome type 1. *Am. J. Hum. Genet.* **105**, 625–630 (2019). [doi:10.1016/j.ajhg.2019.06.011](https://doi.org/10.1016/j.ajhg.2019.06.011) [Medline](#)
75. T. L. Gumieny, L. Macneil, C. M. Zimmerman, H. Wang, L. Chin, J. L. Wrana, R. W. Padgett, *Caenorhabditis elegans* SMA-10/LRIG is a conserved transmembrane protein that enhances bone morphogenetic protein signaling. *PLOS Genet.* **6**, e1000963 (2010). [doi:10.1371/journal.pgen.1000963](https://doi.org/10.1371/journal.pgen.1000963) [Medline](#)
76. Z. Chen, M. Boehnke, X. Wen, B. Mukherjee, Revisiting the genome-wide significance threshold for common variant GWAS. *G3* **11**, jkaa056 (2021). [doi:10.1093/g3journal/jkaa056](https://doi.org/10.1093/g3journal/jkaa056) [Medline](#)
77. J. J. Lee, R. Wedow, A. Okbay, E. Kong, O. Maghzian, M. Zacher, T. A. Nguyen-Viet, P. Bowers, J. Sidorenko, R. Karlsson Linnér, M. A. Fontana, T. Kundu, C. Lee, H. Li, R. Li,

- R. Royer, P. N. Timshel, R. K. Walters, E. A. Willoughby, L. Yengo, M. Alver, Y. Bao, D. W. Clark, F. R. Day, N. A. Furlotte, P. K. Joshi, K. E. Kemper, A. Kleinman, C. Langenberg, R. Mägi, J. W. Trampush, S. S. Verma, Y. Wu, M. Lam, J. H. Zhao, Z. Zheng, J. D. Boardman, H. Campbell, J. Freese, K. M. Harris, C. Hayward, P. Herd, M. Kumari, T. Lencz, J. Luan, A. K. Malhotra, A. Metspalu, L. Milani, K. K. Ong, J. R. B. Perry, D. J. Porteous, M. D. Ritchie, M. C. Smart, B. H. Smith, J. Y. Tung, N. J. Wareham, J. F. Wilson, J. P. Beauchamp, D. C. Conley, T. Esko, S. F. Lehrer, P. K. E. Magnusson, S. Oskarsson, T. H. Pers, M. R. Robinson, K. Thom, C. Watson, C. F. Chabris, M. N. Meyer, D. I. Laibson, J. Yang, M. Johannesson, P. D. Koellinger, P. Turley, P. M. Visscher, D. J. Benjamin, D. Cesarini, 23andMe Research Team, COGENT (Cognitive Genomics Consortium), Social Science Genetic Association Consortium, Gene discovery and polygenic prediction from a genome-wide association study of educational attainment in 1.1 million individuals. *Nat. Genet.* **50**, 1112–1121 (2018). [doi:10.1038/s41588-018-0147-3](https://doi.org/10.1038/s41588-018-0147-3) [Medline](#)
78. J. E. Savage, P. R. Jansen, S. Stringer, K. Watanabe, J. Bryois, C. A. de Leeuw, M. Nagel, S. Awasthi, P. B. Barr, J. R. I. Coleman, K. L. Grasby, A. R. Hammerschlag, J. A. Kaminski, R. Karlsson, E. Krapohl, M. Lam, M. Nygaard, C. A. Reynolds, J. W. Trampush, H. Young, D. Zabaneh, S. Hägg, N. K. Hansell, I. K. Karlsson, S. Linnarsson, G. W. Montgomery, A. B. Muñoz-Manchado, E. B. Quinlan, G. Schumann, N. G. Skene, B. T. Webb, T. White, D. E. Arking, D. Avramopoulos, R. M. Bilder, P. Bitsios, K. E. Burdick, T. D. Cannon, O. Chiba-Falek, A. Christoforou, E. T. Cirulli, E. Congdon, A. Corvin, G. Davies, I. J. Deary, P. DeRosse, D. Dickinson, S. Djurovic, G. Donohoe, E. D. Conley, J. G. Eriksson, T. Espeseth, N. A. Freimer, S. Giakoumaki, I. Giegling, M. Gill, D. C. Glahn, A. R. Hariri, A. Hatzimanolis, M. C. Keller, E. Knowles, D. Koltai, B. Konte, J. Lahti, S. Le Hellard, T. Lencz, D. C. Liewald, E. London, A. J. Lundervold, A. K. Malhotra, I. Melle, D. Morris, A. C. Need, W. Ollier, A. Palotie, A. Payton, N. Pendleton, R. A. Poldrack, K. Räikkönen, I. Reinvang, P. Roussos, D. Rujescu, F. W. Sabb, M. A. Scult, O. B. Smeland, N. Smyrnis, J. M. Starr, V. M. Steen, N. C. Stefanis, R. E. Straub, K. Sundet, H. Tiemeier, A. N. Voineskos, D. R. Weinberger, E. Widen, J. Yu, G. Abecasis, O. A. Andreassen, G. Breen, L. Christiansen, B. Debrabant, D. M. Dick, A. Heinz, J. Hjerling-Leffler, M. A. Ikram, K. S. Kendler, N. G. Martin, S. E. Medland, N. L. Pedersen, R. Plomin, T. J. C. Polderman, S. Ripke, S. van der Sluis, P. F. Sullivan, S. I. Vrieze, M. J. Wright, D. Posthuma, Genome-wide association meta-analysis in 269,867 individuals identifies new genetic and functional links to intelligence. *Nat. Genet.* **50**, 912–919 (2018). [doi:10.1038/s41588-018-0152-6](https://doi.org/10.1038/s41588-018-0152-6) [Medline](#)
79. M. Lam, W. D. Hill, J. W. Trampush, J. Yu, E. Knowles, G. Davies, E. Stahl, L. Huckins, D. C. Liewald, S. Djurovic, I. Melle, K. Sundet, A. Christoforou, I. Reinvang, P. DeRosse, A. J. Lundervold, V. M. Steen, T. Espeseth, K. Räikkönen, E. Widen, A. Palotie, J. G. Eriksson, I. Giegling, B. Konte, A. M. Hartmann, P. Roussos, S. Giakoumaki, K. E. Burdick, A. Payton, W. Ollier, O. Chiba-Falek, D. K. Attix, A. C. Need, E. T. Cirulli, A. N. Voineskos, N. C. Stefanis, D. Avramopoulos, A. Hatzimanolis, D. E. Arking, N. Smyrnis, R. M. Bilder, N. A. Freimer, T. D. Cannon, E. London, R. A. Poldrack, F. W. Sabb, E. Congdon, E. D. Conley, M. A. Scult, D. Dickinson, R. E. Straub, G. Donohoe, D. Morris, A. Corvin, M. Gill, A. R. Hariri, D. R. Weinberger, N. Pendleton, P. Bitsios, D. Rujescu, J. Lahti, S. Le Hellard, M. C. Keller, O. A. Andreassen, I. J. Deary, D. C. Glahn, A. K. Malhotra, T. Lencz, Pleiotropic meta-analysis of cognition, education, and schizophrenia differentiates roles of early neurodevelopmental and adult synaptic

- pathways. *Am. J. Hum. Genet.* **105**, 334–350 (2019). [doi:10.1016/j.ajhg.2019.06.012](https://doi.org/10.1016/j.ajhg.2019.06.012) [Medline](#)
80. R. S. Smith, C. J. Kenny, V. Ganesh, A. Jang, R. Borges-Monroy, J. N. Partlow, R. S. Hill, T. Shin, A. Y. Chen, R. N. Doan, A.-K. Anttonen, J. Ignatius, L. Medne, C. G. Bönnemann, J. L. Hecht, O. Salonen, A. J. Barkovich, A. Poduri, M. Wilke, M. C. Y. de Wit, G. M. S. Mancini, L. Sztriha, K. Im, D. Amrom, E. Andermann, R. Paetau, A.-E. Lehesjoki, C. A. Walsh, M. K. Lehtinen, Sodium channel SCN3A (Nav1.3) regulation of human cerebral cortical folding and oral motor development. *Neuron* **99**, 905–913.e7 (2018). [doi:10.1016/j.neuron.2018.07.052](https://doi.org/10.1016/j.neuron.2018.07.052) [Medline](#)
81. Y. F. Widmer, A. Bilican, R. Bruggmann, S. G. Sprecher, Regulators of long-term memory revealed by mushroom body-specific gene expression profiling in *Drosophila melanogaster*. *Genetics* **209**, 1167–1181 (2018). [doi:10.1534/genetics.118.301106](https://doi.org/10.1534/genetics.118.301106) [Medline](#)
82. M. Pelé, L. Tiret, J.-L. Kessler, S. Blot, J.-J. Panthier, SINE exonic insertion in the *PTPLA* gene leads to multiple splicing defects and segregates with the autosomal recessive centronuclear myopathy in dogs. *Hum. Mol. Genet.* **14**, 1417–1427 (2005). [doi:10.1093/hmg/ddi151](https://doi.org/10.1093/hmg/ddi151) [Medline](#)
83. E. K. Karlsson, S. Sigurdsson, E. Ivansson, R. Thomas, I. Elvers, J. Wright, C. Howald, N. Tonomura, M. Perloski, R. Swofford, T. Biagi, S. Fryc, N. Anderson, C. Courtay-Cahen, L. Youell, S. L. Ricketts, S. Mandlebaum, P. Rivera, H. von Euler, W. C. Kisseberth, C. A. London, E. S. Lander, G. Couto, K. Comstock, M. P. Starkey, J. F. Modiano, M. Breen, K. Lindblad-Toh, Genome-wide analyses implicate 33 loci in heritable dog osteosarcoma, including regulatory variants near *CDKN2A/B*. *Genome Biol.* **14**, R132 (2013). [doi:10.1186/gb-2013-14-12-r132](https://doi.org/10.1186/gb-2013-14-12-r132) [Medline](#)
84. A. R. Boyko, P. Quignon, L. Li, J. J. Schoenebeck, J. D. Degenhardt, K. E. Lohmueller, K. Zhao, A. Brisbin, H. G. Parker, B. M. vonHoldt, M. Cargill, A. Auton, A. Reynolds, A. G. Elkahoun, M. Castelhano, D. S. Mosher, N. B. Sutter, G. S. Johnson, J. Novembre, M. J. Hubisz, A. Siepel, R. K. Wayne, C. D. Bustamante, E. A. Ostrander, A simple genetic architecture underlies morphological variation in dogs. *PLOS Biol.* **8**, e1000451 (2010). [doi:10.1371/journal.pbio.1000451](https://doi.org/10.1371/journal.pbio.1000451) [Medline](#)
85. J. Lonsdale, J. Thomas, M. Salvatore, R. Phillips, E. Lo, S. Shad, R. Hasz, G. Walters, F. Garcia, N. Young, B. Foster, M. Moser, E. Karasik, B. Gillard, K. Ramsey, S. Sullivan, J. Bridge, H. Magazine, J. Syron, J. Fleming, L. Siminoff, H. Traino, M. Mosavel, L. Barker, S. Jewell, D. Rohrer, D. Maxim, D. Filkins, P. Harbach, E. Cortadillo, B. Berghuis, L. Turner, E. Hudson, K. Feenstra, L. Sobin, J. Robb, P. Branton, G. Korzeniewski, C. Shive, D. Tabor, L. Qi, K. Groch, S. Nampally, S. Buia, A. Zimmerman, A. Smith, R. Burges, K. Robinson, K. Valentino, D. Bradbury, M. Cosentino, N. Diaz-Mayoral, M. Kennedy, T. Engel, P. Williams, K. Erickson, K. Ardlie, W. Winckler, G. Getz, D. DeLuca, D. MacArthur, M. Kellis, A. Thomson, T. Young, E. Gelfand, M. Donovan, Y. Meng, G. Grant, D. Mash, Y. Marcus, M. Basile, J. Liu, J. Zhu, Z. Tu, N. J. Cox, D. L. Nicolae, E. R. Gamazon, H. K. Im, A. Konkashbaev, J. Pritchard, M. Stevens, T. Flutre, X. Wen, E. T. Dermitzakis, T. Lappalainen, R. Guigo, J. Monlong, M. Sammeth, D. Koller, A. Battle, S. Mostafavi, M. McCarthy, M. Rivas, J. Maller, I. Rusyn, A. Nobel, F. Wright, A. Shabalin, M. Feolo, N. Sharopova, A. Sturcke, J. Paschal, J. M. Anderson, E. L. Wilder, L. K. Derr, E. D. Green, J. P. Struewing, G. Temple, S.

- Volpi, J. T. Boyer, E. J. Thomson, M. S. Guyer, C. Ng, A. Abdallah, D. Colantuoni, T. R. Insel, S. E. Koester, A. R. Little, P. K. Bender, T. Lehner, Y. Yao, C. C. Compton, J. B. Vaught, S. Sawyer, N. C. Lockhart, J. Demchok, H. F. Moore, The Genotype-Tissue Expression (GTEx) project. *Nat. Genet.* **45**, 580–585 (2013). [doi:10.1038/ng.2653](https://doi.org/10.1038/ng.2653) [Medline](#)
86. E. L. MacLean, N. Snyder-Mackler, B. M. vonHoldt, J. A. Serpell, Highly heritable and functionally relevant breed differences in dog behaviour. *Proc. Biol. Sci.* **286**, 20190716 (2019). [doi:10.1098/rspb.2019.0716](https://doi.org/10.1098/rspb.2019.0716) [Medline](#)
87. A. P. Privitera, R. Distefano, H. A. Wefer, A. Ferro, A. Pulvirenti, R. Giugno, OCDB: A database collecting genes, miRNAs and drugs for obsessive-compulsive disorder. *Database* **2015**, bav069 (2015). [doi:10.1093/database/bav069](https://doi.org/10.1093/database/bav069) [Medline](#)
88. B. S. Abrahams, D. E. Arking, D. B. Campbell, H. C. Mefford, E. M. Morrow, L. A. Weiss, I. Menashe, T. Wadkins, S. Banerjee-Basu, A. Packer, SFARI Gene 2.0: A community-driven knowledgebase for the autism spectrum disorders (ASDs). *Mol. Autism* **4**, 36 (2013). [doi:10.1186/2040-2392-4-36](https://doi.org/10.1186/2040-2392-4-36) [Medline](#)
89. Schizophrenia Working Group of the Psychiatric Genomics Consortium, Biological insights from 108 schizophrenia-associated genetic loci. *Nature* **511**, 421–427 (2014). [doi:10.1038/nature13595](https://doi.org/10.1038/nature13595) [Medline](#)
90. A. F. Pardiñas, P. Holmans, A. J. Pocklington, V. Escott-Price, S. Ripke, N. Carrera, S. E. Legge, S. Bishop, D. Cameron, M. L. Hamshire, J. Han, L. Hubbard, A. Lynham, K. Mantripragada, E. Rees, J. H. MacCabe, S. A. McCarroll, B. T. Baune, G. Breen, E. M. Byrne, U. Dannlowski, T. C. Eley, C. Hayward, N. G. Martin, A. M. McIntosh, R. Plomin, D. J. Porteous, N. R. Wray, A. Caballero, D. H. Geschwind, L. M. Huckins, D. M. Ruderfer, E. Santiago, P. Sklar, E. A. Stahl, H. Won, E. Agerbo, T. D. Als, O. A. Andreassen, M. Bækvad-Hansen, P. B. Mortensen, C. B. Pedersen, A. D. Børglum, J. Bybjerg-Grauholm, S. Djurovic, N. Durmishi, M. G. Pedersen, V. Golimbet, J. Grove, D. M. Hougaard, M. Mattheisen, E. Molden, O. Mors, M. Nordentoft, M. Pejovic-Milovancevic, E. Sigurdsson, T. Silagadze, C. S. Hansen, K. Stefansson, H. Stefansson, S. Steinberg, S. Tosato, T. Werge, D. A. Collier, D. Rujescu, G. Kirov, M. J. Owen, M. C. O'Donovan, J. T. R. Walters, GERAD1 Consortium, CRESTAR Consortium, Common schizophrenia alleles are enriched in mutation-intolerant genes and in regions under strong background selection. *Nat. Genet.* **50**, 381–389 (2018). [doi:10.1038/s41588-018-0059-2](https://doi.org/10.1038/s41588-018-0059-2) [Medline](#)
91. C. A. de Leeuw, J. M. Mooij, T. Heskes, D. Posthuma, MAGMA: Generalized gene-set analysis of GWAS data. *PLOS Comput. Biol.* **11**, e1004219 (2015). [doi:10.1371/journal.pcbi.1004219](https://doi.org/10.1371/journal.pcbi.1004219) [Medline](#)
92. X. Yi, Y. Liang, E. Huerta-Sanchez, X. Jin, Z. X. P. Cuo, J. E. Pool, X. Xu, H. Jiang, N. Vinckenbosch, T. S. Korneliussen, H. Zheng, T. Liu, W. He, K. Li, R. Luo, X. Nie, H. Wu, M. Zhao, H. Cao, J. Zou, Y. Shan, S. Li, Q. Yang, P. Asan, P. Ni, G. Tian, J. Xu, X. Liu, T. Jiang, R. Wu, G. Zhou, M. Tang, J. Qin, T. Wang, S. Feng, G. Li, J. Huasang, J. Luosang, W. Wang, F. Chen, Y. Wang, X. Zheng, Z. Li, Z. Bianba, G. Yang, X. Wang, S. Tang, G. Gao, Y. Chen, Z. Luo, L. Gusang, Z. Cao, Q. Zhang, W. Ouyang, X. Ren, H. Liang, H. Zheng, Y. Huang, J. Li, L. Bolund, K. Kristiansen, Y. Li, Y. Zhang, X. Zhang, R. Li, S. Li, H. Yang, R. Nielsen, J. Wang, J. Wang, Sequencing of 50 human exomes

- reveals adaptation to high altitude. *Science* **329**, 75–78 (2010).  
[doi:10.1126/science.1190371](https://doi.org/10.1126/science.1190371) [Medline](#)
93. B. vonHoldt, Z. Fan, D. Ortega-Del Vecchyo, R. K. Wayne, *EPAS1* variants in high altitude Tibetan wolves were selectively introgressed into highland dogs. *PeerJ* **5**, e3522 (2017).  
[doi:10.7717/peerj.3522](https://doi.org/10.7717/peerj.3522) [Medline](#)
  94. M. S. Sinding, S. Gopalakrishnan, J. Ramos-Madrigal, M. de Manuel, V. V. Pitulko, L. Kuderna, T. R. Feuerborn, L. A. F. Frantz, F. G. Vieira, J. Niemann, J. A. Samaniego Castruita, C. Carøe, E. U. Andersen-Ranberg, P. D. Jordan, E. Y. Pavlova, P. A. Nikolskiy, A. K. Kasparov, V. V. Ivanova, E. Willerslev, P. Skoglund, M. Fredholm, S. E. Wennerberg, M. P. Heide-Jørgensen, R. Dietz, C. Sonne, M. Meldgaard, L. Dalén, G. Larson, B. Petersen, T. Sicheritz-Pontén, L. Bachmann, Ø. Wiig, T. Marques-Bonet, A. J. Hansen, M. T. P. Gilbert, Arctic-adapted dogs emerged at the Pleistocene-Holocene transition. *Science* **368**, 1495–1499 (2020). [doi:10.1126/science.aaz8599](https://doi.org/10.1126/science.aaz8599) [Medline](#)
  95. P. E. Deane-Coe, E. T. Chu, A. Slavney, A. R. Boyko, A. J. Sams, Direct-to-consumer DNA testing of 6,000 dogs reveals 98.6-kb duplication associated with blue eyes and heterochromia in Siberian Huskies. *PLOS Genet.* **14**, e1007648 (2018).  
[doi:10.1371/journal.pgen.1007648](https://doi.org/10.1371/journal.pgen.1007648) [Medline](#)
  96. J. S. Sanjak, J. Sidorenko, M. R. Robinson, K. R. Thornton, P. M. Visscher, Evidence of directional and stabilizing selection in contemporary humans. *Proc. Natl. Acad. Sci. U.S.A.* **115**, 151–156 (2018). [doi:10.1073/pnas.1707227114](https://doi.org/10.1073/pnas.1707227114) [Medline](#)
  97. P. C. Sabeti, S. F. Schaffner, B. Fry, J. Lohmueller, P. Varilly, O. Shamovsky, A. Palma, T. S. Mikkelsen, D. Altshuler, E. S. Lander, Positive natural selection in the human lineage. *Science* **312**, 1614–1620 (2006). [doi:10.1126/science.1124309](https://doi.org/10.1126/science.1124309) [Medline](#)
  98. E. G. Atkinson, A. X. Maihofer, M. Kanai, A. R. Martin, K. J. Karczewski, M. L. Santoro, J. C. Ulirsch, Y. Kamatani, Y. Okada, H. K. Finucane, K. C. Koenen, C. M. Nievergelt, M. J. Daly, B. M. Neale, Tractor uses local ancestry to enable the inclusion of admixed individuals in GWAS and to boost power. *Nat. Genet.* **53**, 195–204 (2021).  
[doi:10.1038/s41588-020-00766-y](https://doi.org/10.1038/s41588-020-00766-y) [Medline](#)
  99. N. Barton, J. Hermisson, M. Nordborg, Population genetics: Why structure matters. *eLife* **8**, e45380 (2019). [doi:10.7554/eLife.45380](https://doi.org/10.7554/eLife.45380) [Medline](#)
  100. G. L. Wojcik, M. Graff, K. K. Nishimura, R. Tao, J. Haessler, C. R. Gignoux, H. M. Highland, Y. M. Patel, E. P. Sorokin, C. L. Avery, G. M. Belbin, S. A. Bien, I. Cheng, S. Cullina, C. J. Hodonsky, Y. Hu, L. M. Huckins, J. Jeff, A. E. Justice, J. M. Kocarnik, U. Lim, B. M. Lin, Y. Lu, S. C. Nelson, S. L. Park, H. Poisner, M. H. Preuss, M. A. Richard, C. Schurmann, V. W. Setiawan, A. Sockell, K. Vahi, M. Verbanck, A. Vishnu, R. W. Walker, K. L. Young, N. Zubair, V. Acuña-Alonso, J. L. Ambite, K. C. Barnes, E. Boerwinkle, E. P. Bottinger, C. D. Bustamante, C. Caberto, S. Canizales-Quinteros, M. P. Conomos, E. Deelman, R. Do, K. Doheny, L. Fernández-Rhodes, M. Fornage, B. Hailu, G. Heiss, B. M. Henn, L. A. Hindorff, R. D. Jackson, C. A. Laurie, C. C. Laurie, Y. Li, D.-Y. Lin, A. Moreno-Estrada, G. Nadkarni, P. J. Norman, L. C. Pooler, A. P. Reiner, J. Romm, C. Sabatti, K. Sandoval, X. Sheng, E. A. Stahl, D. O. Stram, T. A. Thornton, C. L. Wassel, L. R. Wilkens, C. A. Winkler, S. Yoneyama, S. Buyske, C. A. Haiman, C. Kooperberg, L. Le Marchand, R. J. F. Loos, T. C. Matise, K. E. North, U. Peters, E. E.

- Kenny, C. S. Carlson, Genetic analyses of diverse populations improves discovery for complex traits. *Nature* **570**, 514–518 (2019). [doi:10.1038/s41586-019-1310-4](https://doi.org/10.1038/s41586-019-1310-4) [Medline](#)
101. J. E. Moore, M. J. Purcaro, H. E. Pratt, C. B. Epstein, N. Shores, J. Adrian, T. Kawli, C. A. Davis, A. Dobin, R. Kaul, J. Halow, E. L. Van Nostrand, P. Freese, D. U. Gorkin, Y. Shen, Y. He, M. Mackiewicz, F. Pauli-Behn, B. A. Williams, A. Mortazavi, C. A. Keller, X.-O. Zhang, S. I. Elhajjajy, J. Huey, D. E. Dickel, V. Snetkova, X. Wei, X. Wang, J. C. Rivera-Mulia, J. Rozowsky, J. Zhang, S. B. Chhetri, J. Zhang, A. Vectorsen, K. P. White, A. Visel, G. W. Yeo, C. B. Burge, E. Lécuyer, D. M. Gilbert, J. Dekker, J. Rinn, E. M. Mendenhall, J. R. Ecker, M. Kellis, R. J. Klein, W. S. Noble, A. Kundaje, R. Guigó, P. J. Farnham, J. M. Cherry, R. M. Myers, B. Ren, B. R. Graveley, M. B. Gerstein, L. A. Pennacchio, M. P. Snyder, B. E. Bernstein, B. Wold, R. C. Hardison, T. R. Gingeras, J. A. Stamatoyannopoulos, Z. Weng, ENCODE Project Consortium, Expanded encyclopaedias of DNA elements in the human and mouse genomes. *Nature* **583**, 699–710 (2020). [doi:10.1038/s41586-020-2493-4](https://doi.org/10.1038/s41586-020-2493-4) [Medline](#)
  102. K. Megquier, D. P. Genereux, J. Hekman, R. Swofford, J. Turner-Maier, J. Johnson, J. Alonso, X. Li, K. Morrill, L. J. Anguish, M. Koltoonian, B. Logan, C. R. Sharp, L. Ferrer, K. Lindblad-Toh, V. N. Meyers-Wallen, A. Hoffman, E. K. Karlsson, BarkBase: Epigenomic annotation of canine genomes. *Genes* **10**, 433 (2019). [doi:10.3390/genes10060433](https://doi.org/10.3390/genes10060433) [Medline](#)
  103. Zoonomia Consortium, A comparative genomics multitool for scientific discovery and conservation. *Nature* **587**, 240–245 (2020). [doi:10.1038/s41586-020-2876-6](https://doi.org/10.1038/s41586-020-2876-6) [Medline](#)
  104. K. Morrill, J. Hekman, X. Li, J. McClure, B. Logan, L. Goodman, M. Gao, Y. Dong, M. Alonso, E. Carmichael, N. Snyder-Mackler, J. Alonso, H. J. Noh, J. Johnson, M. Koltoonian, C. Lieu, K. Megquier, R. Swofford, J. Turner-Maier, M. E. White, Z. Weng, A. Colubri, D. P. Genereux, K. A. Lord, E. K. Karlsson, Associated data files and scripts for “Ancestry-inclusive dog genomics challenges popular breed stereotypes”. Dryad (2022); <https://doi.org/10.5061/dryad.g4f4qfr0>.
  105. K. Morrill, J. Hekman, X. Li, J. McClure, B. Logan, L. Goodman, M. Gao, Y. Dong, M. Alonso, E. Carmichael, N. Snyder-Mackler, J. Alonso, H. J. Noh, J. Johnson, M. Koltoonian, C. Lieu, K. Megquier, R. Swofford, J. Turner-Maier, M. E. White, Z. Weng, A. Colubri, D. P. Genereux, K. A. Lord, E. K. Karlsson, Associated data files and scripts for “Ancestry-inclusive dog genomics challenges popular breed stereotypes”. Zenodo (2022); <https://doi.org/10.5281/zenodo.5808330>.
  106. K. Morrill, Darwin’s Ark - Data release 2022. Terra (2022); <https://app.terra.bio/#workspaces/darwins-ark/Darwins%20Ark%20-%20Data%20Release%202022>.
  107. K. Morrill, J. Hekman, X. Li, J. McClure, B. Logan, L. Goodman, M. Gao, Y. Dong, M. Alonso, E. Carmichael, N. Snyder-Mackler, J. Alonso, H. J. Noh, J. Johnson, M. Koltoonian, C. Lieu, K. Megquier, R. Swofford, J. Turner-Maier, M. E. White, Z. Weng, A. Colubri, D. P. Genereux, K. A. Lord, E. K. Karlsson, Additional figures for “Ancestry-inclusive dog genomics challenges popular breed stereotypes”. FigShare (2022); <https://doi.org/10.6084/m9.figshare.16608793>.

108. R. Trevejo, M. Yang, E. M. Lund, Epidemiology of surgical castration of dogs and cats in the United States. *J. Am. Vet. Med. Assoc.* **238**, 898–904 (2011). [doi:10.2460/javma.238.7.898](https://doi.org/10.2460/javma.238.7.898) [Medline](#)
109. J. Plassais, M. Rimbault, F. J. Williams, B. W. Davis, J. J. Schoenebeck, E. A. Ostrander, Analysis of large versus small dogs reveals three genes on the canine X chromosome associated with body weight, muscling and back fat thickness. *PLOS Genet.* **13**, e1006661 (2017). [doi:10.1371/journal.pgen.1006661](https://doi.org/10.1371/journal.pgen.1006661) [Medline](#)
110. H. E. Salvin, P. D. McGreevy, P. S. Sachdev, M. J. Valenzuela, Growing old gracefully—Behavioral changes associated with “successful aging” in the dog, *Canis familiaris*. *J. Vet. Behav.* **6**, 313–320 (2011). [doi:10.1016/j.jveb.2011.04.004](https://doi.org/10.1016/j.jveb.2011.04.004)
111. G. Raïche, T. A. Walls, D. Magis, M. Riopel, J.-G. Blais, Non-graphical solutions for Cattell’s scree test. *Methodology* **9**, 23–29 (2013). [doi:10.1027/1614-2241/a000051](https://doi.org/10.1027/1614-2241/a000051)
112. F. C. Ceballos, S. Hazelhurst, M. Ramsay, Assessing runs of homozygosity: A comparison of SNP array and whole genome sequence low coverage data. *BMC Genomics* **19**, 106 (2018). [doi:10.1186/s12864-018-4489-0](https://doi.org/10.1186/s12864-018-4489-0) [Medline](#)
113. N. Li, M. Stephens, Modeling linkage disequilibrium and identifying recombination hotspots using single-nucleotide polymorphism data. *Genetics* **165**, 2213–2233 (2003). [doi:10.1093/genetics/165.4.2213](https://doi.org/10.1093/genetics/165.4.2213) [Medline](#)
114. R. Meyermans, W. Gorssen, N. Buys, S. Janssens, How to study runs of homozygosity using PLINK? A guide for analyzing medium density SNP data in livestock and pet species. *BMC Genomics* **21**, 94 (2020). [doi:10.1186/s12864-020-6463-x](https://doi.org/10.1186/s12864-020-6463-x) [Medline](#)
115. R. McQuillan, A.-L. Leutenegger, R. Abdel-Rahman, C. S. Franklin, M. Pericic, L. Barac-Lauc, N. Smolej-Narancic, B. Janicijevic, O. Polasek, A. Tenesa, A. K. Macleod, S. M. Farrington, P. Rudan, C. Hayward, V. Vitart, I. Rudan, S. H. Wild, M. G. Dunlop, A. F. Wright, H. Campbell, J. F. Wilson, Runs of homozygosity in European populations. *Am. J. Hum. Genet.* **83**, 359–372 (2008). [doi:10.1016/j.ajhg.2008.08.007](https://doi.org/10.1016/j.ajhg.2008.08.007) [Medline](#)
116. A. J. Sams, A. R. Boyko, Fine-scale resolution of runs of homozygosity reveal patterns of inbreeding and substantial overlap with recessive disease genotypes in domestic dogs. *G3* **9**, 117–123 (2019). [doi:10.1534/g3.118.200836](https://doi.org/10.1534/g3.118.200836) [Medline](#)
117. A. Manichaikul, J. C. Mychaleckyj, S. S. Rich, K. Daly, M. Sale, W.-M. Chen, Robust relationship inference in genome-wide association studies. *Bioinformatics* **26**, 2867–2873 (2010). [doi:10.1093/bioinformatics/btq559](https://doi.org/10.1093/bioinformatics/btq559) [Medline](#)
118. J. J. Hayward, M. G. Castelhamo, K. C. Oliveira, E. Corey, C. Balkman, T. L. Baxter, M. L. Casal, S. A. Center, M. Fang, S. J. Garrison, S. E. Kalla, P. Korniliev, M. I. Kotlikoff, N. S. Moise, L. M. Shannon, K. W. Simpson, N. B. Sutter, R. J. Todhunter, A. R. Boyko, Complex disease and phenotype mapping in the domestic dog. *Nat. Commun.* **7**, 10460 (2016). [doi:10.1038/ncomms10460](https://doi.org/10.1038/ncomms10460) [Medline](#)
119. A. Auton, Y. Rui Li, J. Kidd, K. Oliveira, J. Nadel, J. K. Holloway, J. J. Hayward, P. E. Cohen, J. M. Greally, J. Wang, C. D. Bustamante, A. R. Boyko, Genetic recombination is targeted towards gene promoter regions in dogs. *PLOS Genet.* **9**, e1003984 (2013). [doi:10.1371/journal.pgen.1003984](https://doi.org/10.1371/journal.pgen.1003984) [Medline](#)
120. D. H. Alexander, J. Novembre, K. Lange, Fast model-based estimation of ancestry in

- unrelated individuals. *Genome Res.* **19**, 1655–1664 (2009). [doi:10.1101/gr.094052.109](https://doi.org/10.1101/gr.094052.109) [Medline](#)
121. L. M. Evans, R. Tahmasbi, S. I. Vrieze, G. R. Abecasis, S. Das, S. Gazal, D. W. Bjelland, T. R. de Candia, M. E. Goddard, B. M. Neale, J. Yang, P. M. Visscher, M. C. Keller, Haplotype Reference Consortium, Comparison of methods that use whole genome data to estimate the heritability and genetic architecture of complex traits. *Nat. Genet.* **50**, 737–745 (2018). [doi:10.1038/s41588-018-0108-x](https://doi.org/10.1038/s41588-018-0108-x) [Medline](#)
  122. P. H. Westfall, S. Stanley Young, *Resampling-Based Multiple Testing: Examples and Methods for p-Value Adjustment* (Wiley, 1993).
  123. B. Phipson, G. K. Smyth, Permutation P-values should never be zero: Calculating exact P-values when permutations are randomly drawn. *Stat. Appl. Genet. Mol. Biol.* **9**, e39 (2010). [doi:10.2202/1544-6115.1585](https://doi.org/10.2202/1544-6115.1585) [Medline](#)
  124. A. Ziyatdinov, M. Vázquez-Santiago, H. Brunel, A. Martinez-Perez, H. Aschard, J. M. Soria, lme4qtl: Linear mixed models with flexible covariance structure for genetic studies of related individuals. *BMC Bioinformatics* **19**, 68 (2018). [doi:10.1186/s12859-018-2057-x](https://doi.org/10.1186/s12859-018-2057-x) [Medline](#)
  125. D. Bates, M. Mächler, B. Bolker, S. Walker, Fitting linear mixed-effects models using lme4. [arXiv:1406.5823](https://arxiv.org/abs/1406.5823) [stat.CO] (2014).
  126. D. Bates, lmer, p-values and all that (2006); <https://stat.ethz.ch/pipermail/r-help/2006-May/094765.html>.
  127. S. Nakagawa, H. Schielzeth, A general and simple method for obtaining  $R^2$  from generalized linear mixed-effects models. *Methods Ecol. Evol.* **4**, 133–142 (2013). [doi:10.1111/j.2041-210x.2012.00261.x](https://doi.org/10.1111/j.2041-210x.2012.00261.x)
  128. B. Langmead, S. L. Salzberg, Fast gapped-read alignment with Bowtie 2. *Nat. Methods* **9**, 357–359 (2012). [doi:10.1038/nmeth.1923](https://doi.org/10.1038/nmeth.1923) [Medline](#)
  129. Y. Zhang, T. Liu, C. A. Meyer, J. Eeckhoute, D. S. Johnson, B. E. Bernstein, C. Nusbaum, R. M. Myers, M. Brown, W. Li, X. S. Liu, Model-based analysis of ChIP-seq (MACS). *Genome Biol.* **9**, R137 (2008). [doi:10.1186/gb-2008-9-9-r137](https://doi.org/10.1186/gb-2008-9-9-r137) [Medline](#)
  130. K. Wang, X. Hu, Y. Peng, An analytical comparison of the principal component method and the mixed effects model for association studies in the presence of cryptic relatedness and population stratification. *Hum. Hered.* **76**, 1–9 (2013). [doi:10.1159/000353345](https://doi.org/10.1159/000353345) [Medline](#)
  131. J. Yang, N. A. Zaitlen, M. E. Goddard, P. M. Visscher, A. L. Price, Advantages and pitfalls in the application of mixed-model association methods. *Nat. Genet.* **46**, 100–106 (2014). [doi:10.1038/ng.2876](https://doi.org/10.1038/ng.2876) [Medline](#)
  132. L. Jiang, Z. Zheng, T. Qi, K. E. Kemper, N. R. Wray, P. M. Visscher, J. Yang, A resource-efficient tool for mixed model association analysis of large-scale data. *Nat. Genet.* **51**, 1749–1755 (2019). [doi:10.1038/s41588-019-0530-8](https://doi.org/10.1038/s41588-019-0530-8) [Medline](#)
  133. E. Demidenko, *Mixed Models: Theory and Applications with R* (Wiley, 2013).

134. L. Ma, G. R. Wiggans, S. Wang, T. S. Sonstegard, J. Yang, B. A. Crooker, J. B. Cole, C. P. Van Tassell, T. J. Lawlor, Y. Da, Effect of sample stratification on dairy GWAS results. *BMC Genomics* **13**, 536 (2012). [doi:10.1186/1471-2164-13-536](https://doi.org/10.1186/1471-2164-13-536) [Medline](#)
135. A.-S. Malaspinas, M. C. Westaway, C. Muller, V. C. Sousa, O. Lao, I. Alves, A. Bergström, G. Athanasiadis, J. Y. Cheng, J. E. Crawford, T. H. Heupink, E. Macholdt, S. Peischl, S. Rasmussen, S. Schiffels, S. Subramanian, J. L. Wright, A. Albrechtsen, C. Barbieri, I. Dupanloup, A. Eriksson, A. Margaryan, I. Moltke, I. Pugach, T. S. Korneliussen, I. P. Levkivskyi, J. V. Moreno-Mayar, S. Ni, F. Racimo, M. Sikora, Y. Xue, F. A. Aghakhanian, N. Brucato, S. Brunak, P. F. Campos, W. Clark, S. Ellingvåg, G. Fourmile, P. Gerbault, D. Injie, G. Koki, M. Leavesley, B. Logan, A. Lynch, E. A. Matisoo-Smith, P. J. McAllister, A. J. Mentzer, M. Metspalu, A. B. Migliano, L. Murcha, M. E. Phipps, W. Pomat, D. Reynolds, F.-X. Ricaut, P. Siba, M. G. Thomas, T. Wales, C. M. Wall, S. J. Oppenheimer, C. Tyler-Smith, R. Durbin, J. Dortch, A. Manica, M. H. Schierup, R. A. Foley, M. M. Lahr, C. Bowern, J. D. Wall, T. Mailund, M. Stoneking, R. Nielsen, M. S. Sandhu, L. Excoffier, D. M. Lambert, E. Willerslev, A genomic history of Aboriginal Australia. *Nature* **538**, 207–214 (2016). [doi:10.1038/nature18299](https://doi.org/10.1038/nature18299) [Medline](#)
136. C.-J. Rubin, M. C. Zody, J. Eriksson, J. R. S. Meadows, E. Sherwood, M. T. Webster, L. Jiang, M. Ingman, T. Sharpe, S. Ka, F. Hallböök, F. Besnier, O. Carlborg, B. Bed'hom, M. Tixier-Boichard, P. Jensen, P. Siegel, K. Lindblad-Toh, L. Andersson, Whole-genome resequencing reveals loci under selection during chicken domestication. *Nature* **464**, 587–591 (2010). [doi:10.1038/nature08832](https://doi.org/10.1038/nature08832) [Medline](#)
137. C. C. Little, *The Inheritance of Coat Color in Dogs* (Comstock Pub. Associates, 1957).
138. M. N. Weedon, G. Lettre, R. M. Freathy, C. M. Lindgren, B. F. Voight, J. R. B. Perry, K. S. Elliott, R. Hackett, C. Guiducci, B. Shields, E. Zeggini, H. Lango, V. Lyssenko, N. J. Timpson, N. P. Burtt, N. W. Rayner, R. Saxena, K. Ardlie, J. H. Tobias, A. R. Ness, S. M. Ring, C. N. A. Palmer, A. D. Morris, L. Peltonen, V. Salomaa, G. Davey Smith, L. C. Groop, A. T. Hattersley, M. I. McCarthy, J. N. Hirschhorn, T. M. Frayling, Diabetes Genetics Initiative, Wellcome Trust Case Control Consortium, A common variant of *HMGA2* is associated with adult and childhood height in the general population. *Nat. Genet.* **39**, 1245–1250 (2007). [doi:10.1038/ng2121](https://doi.org/10.1038/ng2121) [Medline](#)
139. U. Sovio, A. J. Bennett, I. Y. Millwood, J. Molitor, P. F. O'Reilly, N. J. Timpson, M. Kaakinen, J. Laitinen, J. Haukka, D. Pillas, I. Tzoulaki, J. Molitor, C. Hoggart, L. J. M. Coin, J. Whittaker, A. Pouta, A.-L. Hartikainen, N. B. Freimer, E. Widen, L. Peltonen, P. Elliott, M. I. McCarthy, M.-R. Jarvelin, Genetic determinants of height growth assessed longitudinally from infancy to adulthood in the northern Finland birth cohort 1966. *PLOS Genet.* **5**, e1000409 (2009). [doi:10.1371/journal.pgen.1000409](https://doi.org/10.1371/journal.pgen.1000409) [Medline](#)
140. J. Metzger, R. Schrimpf, U. Philipp, O. Distl, Expression levels of *LCORL* are associated with body size in horses. *PLOS ONE* **8**, e56497 (2013). [doi:10.1371/journal.pone.0056497](https://doi.org/10.1371/journal.pone.0056497) [Medline](#)
141. J. Tetens, P. Widmann, C. Kühn, G. Thaller, A genome-wide association study indicates *LCORL/NCAPG* as a candidate locus for withers height in German Warmblood horses. *Anim. Genet.* **44**, 467–471 (2013). [doi:10.1111/age.12031](https://doi.org/10.1111/age.12031) [Medline](#)

142. J. E. Pryce, B. J. Hayes, S. Bolormaa, M. E. Goddard, Polymorphic regions affecting human height also control stature in cattle. *Genetics* **187**, 981–984 (2011).  
[doi:10.1534/genetics.110.123943](https://doi.org/10.1534/genetics.110.123943) [Medline](#)
143. A. C. Bouwman, H. D. Daetwyler, A. J. Chamberlain, C. H. Ponce, M. Sargolzaei, F. S. Schenkel, G. Sahana, A. Govignon-Gion, S. Boitard, M. Dolezal, H. Pausch, R. F. Brøndum, P. J. Bowman, B. Thomsen, B. Guldbrandsen, M. S. Lund, B. Servin, D. J. Garrick, J. Reecy, J. Vilkki, A. Bagnato, M. Wang, J. L. Hoff, R. D. Schnabel, J. F. Taylor, A. A. E. Vinkhuyzen, F. Panitz, C. Bendixen, L.-E. Holm, B. Gredler, C. Hozé, M. Boussaha, M.-P. Sanchez, D. Rocha, A. Capitan, T. Tribout, A. Barbat, P. Croiseau, C. Drögemüller, V. Jagannathan, C. Vander Jagt, J. J. Crowley, A. Bieber, D. C. Purfield, D. P. Berry, R. Emmerling, K.-U. Götz, M. Frischknecht, I. Russ, J. Sölkner, C. P. Van Tassell, R. Fries, P. Stothard, R. F. Veerkamp, D. Boichard, M. E. Goddard, B. J. Hayes, Meta-analysis of genome-wide association studies for cattle stature identifies common genes that regulate body size in mammals. *Nat. Genet.* **50**, 362–367 (2018).  
[doi:10.1038/s41588-018-0056-5](https://doi.org/10.1038/s41588-018-0056-5) [Medline](#)
144. E. Gadelha Pereira Fontenele, M. E. Amaral de Moraes, C. Brasil d’Alva, D. P. Pinheiro, S. Aguiar Sales Pinheiro Landim, F. A. de Sousa Barros, E. Barbosa Trarbach, B. Bilharinho de Mendonca, A. A. Lima Jorge, Association study of GWAS-derived loci with height in Brazilian children: Importance of *MAP3K3*, *MMP24* and *IGF1R* polymorphisms for height variation. *Horm. Res. Paediatr.* **84**, 248–253 (2015).  
[doi:10.1159/000437324](https://doi.org/10.1159/000437324) [Medline](#)
145. M. D. Mavalli, D. J. DiGirolamo, Y. Fan, R. C. Riddle, K. S. Campbell, T. van Groen, S. J. Frank, M. A. Sperling, K. A. Esser, M. M. Bamman, T. L. Clemens, Distinct growth hormone receptor signaling modes regulate skeletal muscle development and insulin sensitivity in mice. *J. Clin. Invest.* **120**, 4007–4020 (2010). [doi:10.1172/JCI42447](https://doi.org/10.1172/JCI42447)  
[Medline](#)
146. Y. Cao, X. Song, H. Shan, J. Jiang, P. Xiong, J. Wu, F. Shi, Y. Jiang, Genome-wide association study of body weights in Hu sheep and population verification of related single-nucleotide polymorphisms. *Front. Genet.* **11**, 588 (2020).  
[doi:10.3389/fgene.2020.00588](https://doi.org/10.3389/fgene.2020.00588) [Medline](#)
147. S. M. Schmutz, T. G. Berryere, D. L. Dreger, *MITF* and white spotting in dogs: A population study. *J. Hered.* **100**, S66–S74 (2009). [doi:10.1093/jhered/esp029](https://doi.org/10.1093/jhered/esp029)
148. I. Baranowska Körberg, E. Sundström, J. R. S. Meadows, G. Rosengren Pielberg, U. Gustafson, Å. Hedhammar, E. K. Karlsson, J. Seddon, A. Söderberg, C. Vilà, X. Zhang, M. Åkesson, K. Lindblad-Toh, G. Andersson, L. Andersson, A simple repeat polymorphism in the *MITF-M* promoter is a key regulator of white spotting in dogs. *PLOS ONE* **9**, e104363 (2014). [doi:10.1371/journal.pone.0104363](https://doi.org/10.1371/journal.pone.0104363) [Medline](#)
149. S. Hofstetter, F. Seefried, I. M. Häfliger, V. Jagannathan, T. Leeb, C. Drögemüller, A non-coding regulatory variant in the 5'-region of the *MITF* gene is associated with white-spotted coat in Brown Swiss cattle. *Anim. Genet.* **50**, 27–32 (2019).  
[doi:10.1111/age.12751](https://doi.org/10.1111/age.12751) [Medline](#)
150. G. Wang, J. Liao, M. Tang, S. Yu, Genetic variation in the *MITF* promoter affects skin colour and transcriptional activity in black-boned chickens. *Br. Poult. Sci.* **59**, 21–27 (2018). [doi:10.1080/00071668.2017.1379053](https://doi.org/10.1080/00071668.2017.1379053) [Medline](#)

151. J. M. Paris, A. Letko, I. M. Häfliger, P. Ammann, C. Drögemüller, Ear type in sheep is associated with the *MSRB3* locus. *Anim. Genet.* **51**, 968–972 (2020). [doi:10.1111/age.12994](https://doi.org/10.1111/age.12994) [Medline](#)
152. C. Chen, C. Liu, X. Xiong, S. Fang, H. Yang, Z. Zhang, J. Ren, Y. Guo, L. Huang, Copy number variation in the *MSRB3* gene enlarges porcine ear size through a mechanism involving miR-584-5p. *Genet. Sel. Evol.* **50**, 72 (2018). [doi:10.1186/s12711-018-0442-6](https://doi.org/10.1186/s12711-018-0442-6) [Medline](#)
153. L. Zhang, J. Liang, W. Luo, X. Liu, H. Yan, K. Zhao, H. Shi, Y. Zhang, L. Wang, L. Wang, Genome-wide scan reveals *LEMD3* and *WIFI* on SSC5 as the candidates for porcine ear size. *PLOS ONE* **9**, e102085 (2014). [doi:10.1371/journal.pone.0102085](https://doi.org/10.1371/journal.pone.0102085) [Medline](#)
154. J. Liang, N. Li, L.-C. Zhang, L.-G. Wang, X. Liu, K.-B. Zhao, H. Yan, L. Pu, Y.-B. Zhang, H.-B. Shi, Q. Zhang, L.-X. Wang, Porcine *LEM domain-containing 3*: Molecular cloning, functional characterization, and polymorphism associated with ear size. *J. Integr. Agric.* **15**, 1321–1329 (2016). [doi:10.1016/S2095-3119\(15\)61173-X](https://doi.org/10.1016/S2095-3119(15)61173-X)
155. D. J. E. Housley, P. J. Venta, The long and the short of it: Evidence that *FGF5* is a major determinant of canine ‘hair’-itability. *Anim. Genet.* **37**, 309–315 (2006). [doi:10.1111/j.1365-2052.2006.01448.x](https://doi.org/10.1111/j.1365-2052.2006.01448.x) [Medline](#)
156. C. Dierks, S. Mömke, U. Philipp, O. Distl, Allelic heterogeneity of *FGF5* mutations causes the long-hair phenotype in dogs. *Anim. Genet.* **44**, 425–431 (2013). [doi:10.1111/age.12010](https://doi.org/10.1111/age.12010) [Medline](#)
157. C. Drögemüller, S. Rüfenacht, B. Wichert, T. Leeb, Mutations within the *FGF5* gene are associated with hair length in cats. *Anim. Genet.* **38**, 218–221 (2007). [doi:10.1111/j.1365-2052.2007.01590.x](https://doi.org/10.1111/j.1365-2052.2007.01590.x) [Medline](#)
158. H. G. Parker, K. Chase, E. Cadieu, K. G. Lark, E. A. Ostrander, An insertion in the *RSPO2* gene correlates with improper coat in the Portuguese water dog. *J. Hered.* **101**, 612–617 (2010). [doi:10.1093/jhered/esq068](https://doi.org/10.1093/jhered/esq068) [Medline](#)
159. T. Kawakami, M. K. Jensen, A. Slavney, P. E. Deane, A. Milano, V. Raghavan, B. Ford, E. T. Chu, A. J. Sams, A. R. Boyko, R-locus for roaned coat is associated with a tandem duplication in an intronic region of *USH2A* in dogs and also contributes to Dalmatian spotting. *PLOS ONE* **16**, e0248233 (2021). [doi:10.1371/journal.pone.0248233](https://doi.org/10.1371/journal.pone.0248233) [Medline](#)
160. L. A. Clark, J. M. Wahl, C. A. Rees, K. E. Murphy, Retrotransposon insertion in *SILV* is responsible for merle patterning of the domestic dog. *Proc. Natl. Acad. Sci. U.S.A.* **103**, 1376–1381 (2006). [doi:10.1073/pnas.0506940103](https://doi.org/10.1073/pnas.0506940103) [Medline](#)
161. B. C. Ballif, C. J. Ramirez, C. R. Carl, K. Sundin, M. Krug, A. Zahand, L. G. Shaffer, H. Flores-Smith, The *PMEL* gene and merle in the domestic dog: A continuum of insertion lengths leads to a spectrum of coat color variations in Australian shepherds and related breeds. *Cytogenet. Genome Res.* **156**, 22–34 (2018). [doi:10.1159/000491408](https://doi.org/10.1159/000491408) [Medline](#)
162. Z. Pelles, A. Gáspárdy, L. Zöldág, X. Lénárt, N. Ninausz, L. Varga, P. Zenke, Merle allele variations in the Mudi dog breed and their effects on phenotypes. *Acta Vet. Hung.* **67**, 159–173 (2019). [doi:10.1556/004.2019.018](https://doi.org/10.1556/004.2019.018) [Medline](#)
163. Y. Jin, S. A. Birlea, P. R. Fain, C. M. Mailloux, S. L. Riccardi, K. Gowan, P. J. Holland, D. C. Bennett, M. R. Wallace, W. T. McCormack, E. H. Kemp, D. J. Gawkrödger, A. P.

- Weetman, M. Picardo, G. Leone, A. Taïeb, T. Jouary, K. Ezzedine, N. van Geel, J. Lambert, A. Overbeck, R. A. Spritz, Common variants in *FOXP1* are associated with generalized vitiligo. *Nat. Genet.* **42**, 576–578 (2010). [doi:10.1038/ng.602](https://doi.org/10.1038/ng.602) [Medline](#)
164. E. Leishman, J. M. Howard, G. E. Garcia, Q. Miao, A. T. Ku, J. D. Dekker, H. Tucker, H. Nguyen, Foxp1 maintains hair follicle stem cell quiescence through regulation of Fgf18. *Development* **140**, 3809–3818 (2013). [doi:10.1242/dev.097477](https://doi.org/10.1242/dev.097477) [Medline](#)
165. Y. Bian, G. Wei, X. Song, L. Yuan, H. Chen, T. Ni, D. Lu, Global downregulation of pigmentation-associated genes in human premature hair graying. *Exp. Ther. Med.* **18**, 1155–1163 (2019). [doi:10.3892/etm.2019.7663](https://doi.org/10.3892/etm.2019.7663) [Medline](#)
166. E. J. Cargill, T. R. Famula, R. D. Schnabel, G. M. Strain, K. E. Murphy, The color of a Dalmatian's spots: Linkage evidence to support the *TYRP1* gene. *BMC Vet. Res.* **1**, 1 (2005). [doi:10.1186/1746-6148-1-1](https://doi.org/10.1186/1746-6148-1-1) [Medline](#)
167. H. E. Wright, E. Schofield, C. S. Mellersh, L. M. Burmeister, A novel *TYRP1* variant is associated with liver and tan coat colour in Lancashire heblers. *Anim. Genet.* **50**, 783 (2019). [doi:10.1111/age.12839](https://doi.org/10.1111/age.12839) [Medline](#)
168. L. V. Monteagudo, M. T. Tejedor, The *b<sup>c</sup>* allele of *TYRP1* is causative for the recessive brown (liver) colour in German Shepherd dogs. *Anim. Genet.* **46**, 588–589 (2015). [doi:10.1111/age.12337](https://doi.org/10.1111/age.12337) [Medline](#)
169. S. Rieder, S. Taourit, D. Mariat, B. Langlois, G. Guérin, Mutations in the agouti (*ASIP*), the extension (*MC1R*), and the brown (*TYRP1*) loci and their association to coat color phenotypes in horses (*Equus caballus*). *Mamm. Genome* **12**, 450–455 (2001). [doi:10.1007/s003350020017](https://doi.org/10.1007/s003350020017) [Medline](#)
